# Supplementary material (part 2 of 2)
Source: ML conference proceedings conference paper supplement (https://proceedings.neurips.cc/paper_files/paper/2021/hash/ebb71045453f38676c40deb9864f811d-Abstract.html)

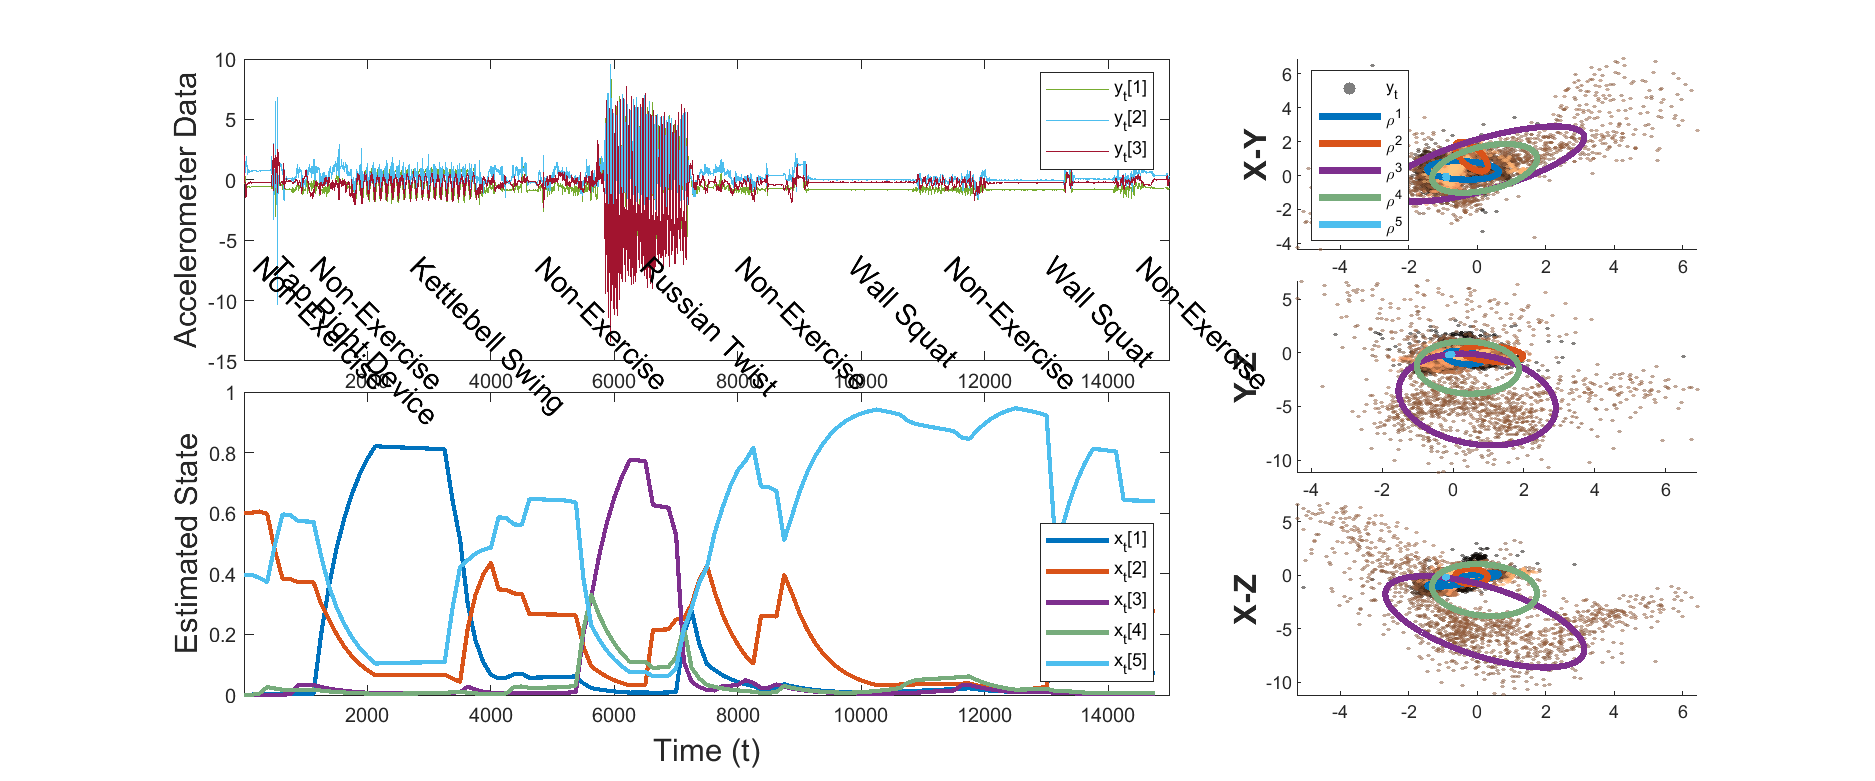

Supplement: Supplementary file 1 [file ebb71045453f38676c40deb9864f811d-Supplemental.zip › Supplement/MSR_GT_Plots/subj075_1.png]

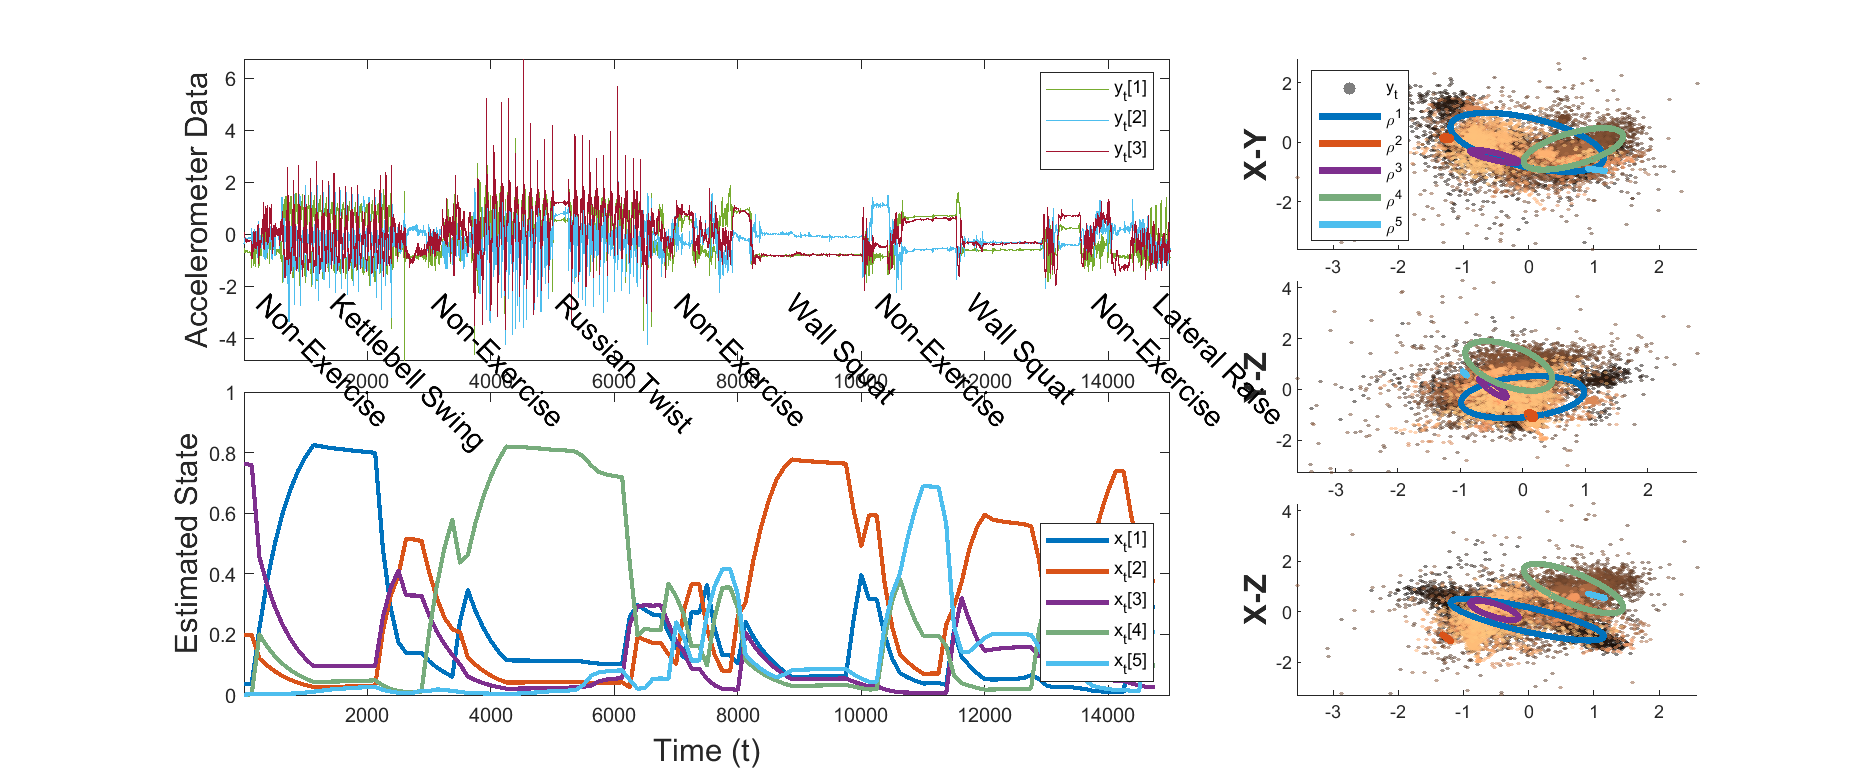

Supplement: Supplementary file 1 [file ebb71045453f38676c40deb9864f811d-Supplemental.zip › Supplement/MSR_GT_Plots/subj076_1.png]

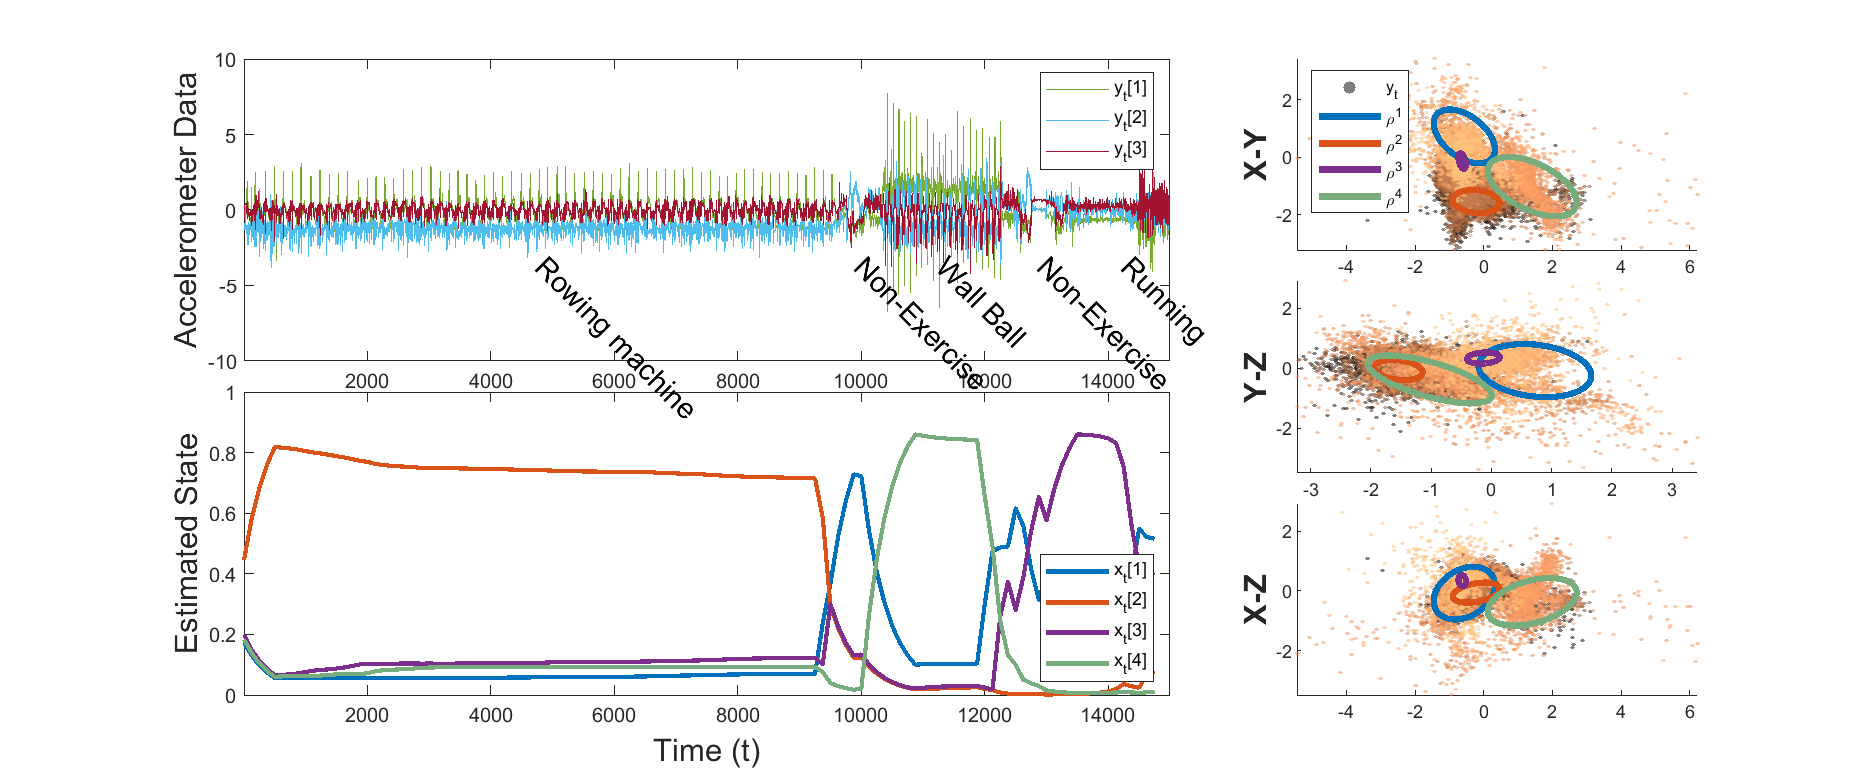

Supplement: Supplementary file 1 [file ebb71045453f38676c40deb9864f811d-Supplemental.zip › Supplement/MSR_GT_Plots/subj076_2.png]

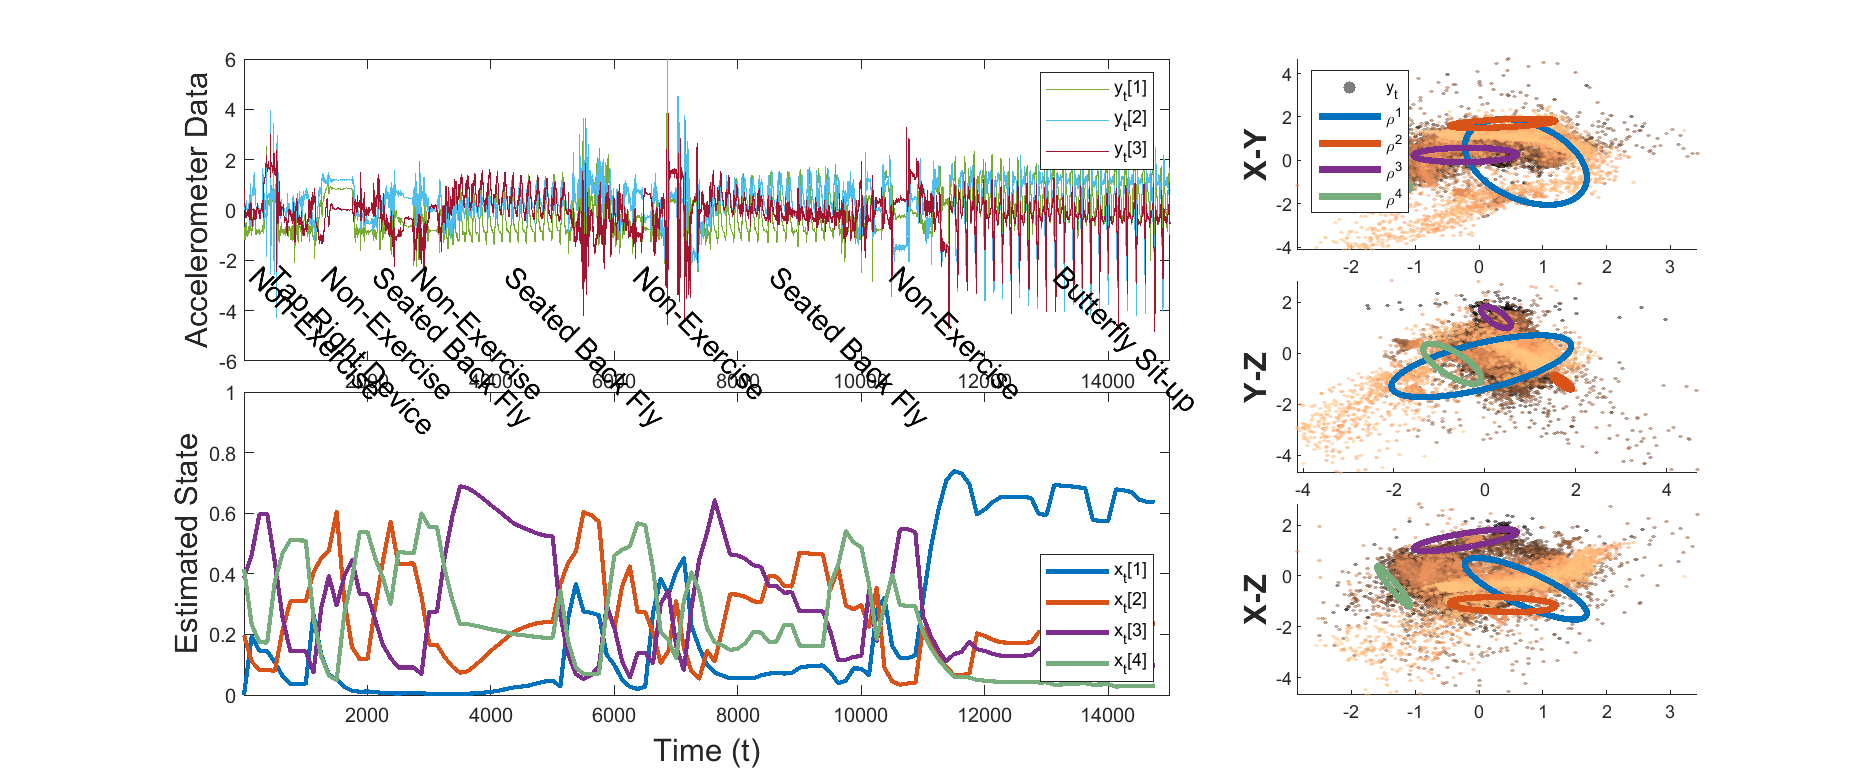

Supplement: Supplementary file 1 [file ebb71045453f38676c40deb9864f811d-Supplemental.zip › Supplement/MSR_GT_Plots/subj077_1.png]

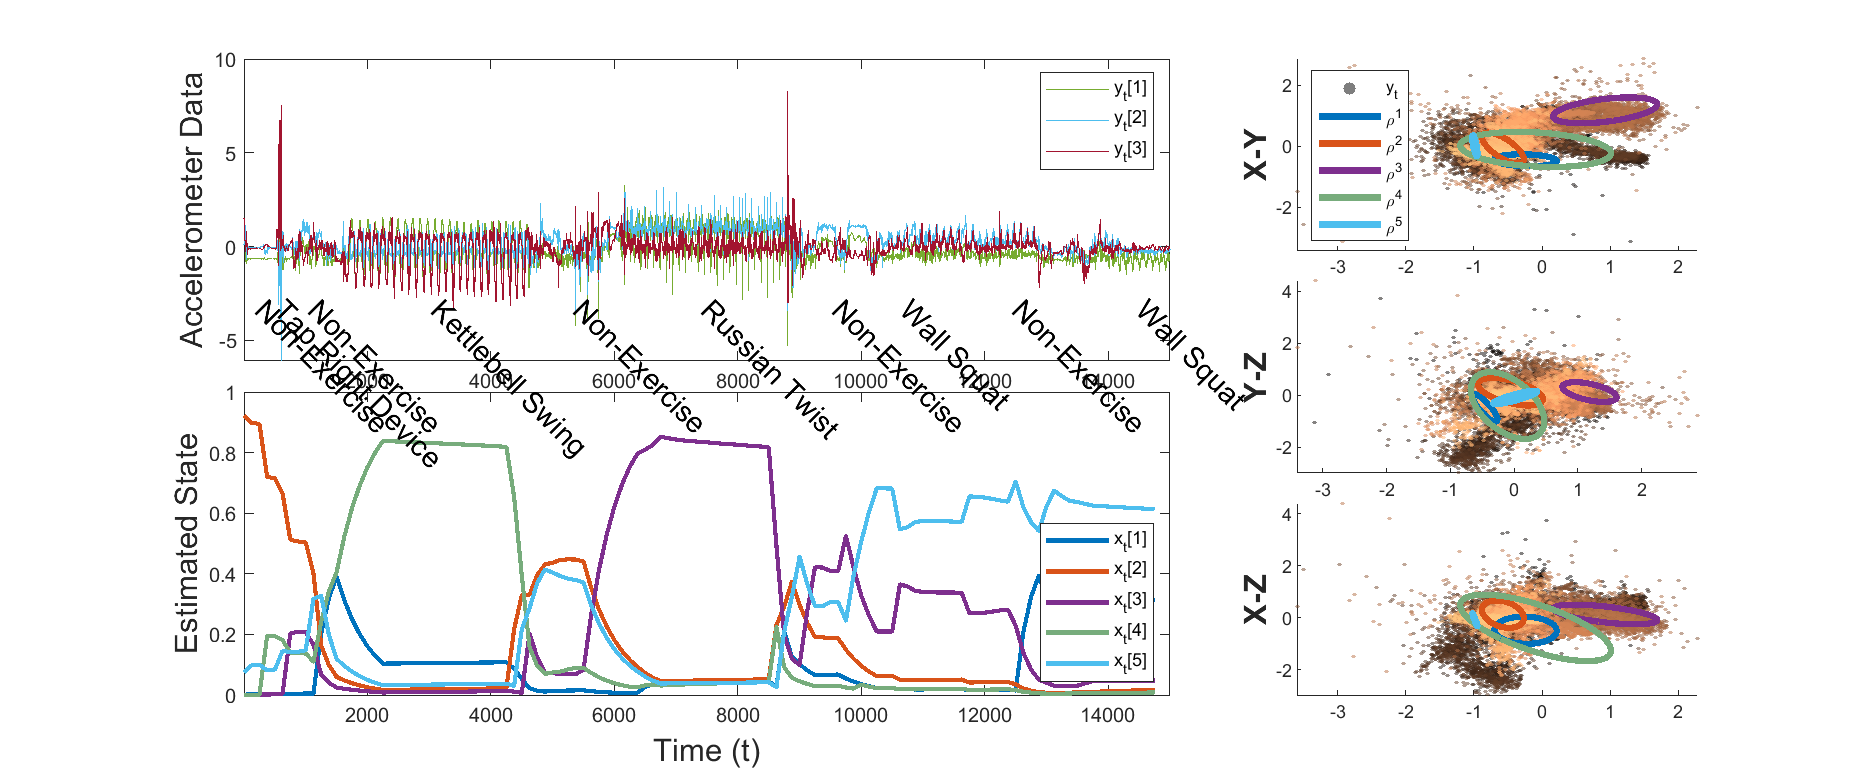

Supplement: Supplementary file 1 [file ebb71045453f38676c40deb9864f811d-Supplemental.zip › Supplement/MSR_GT_Plots/subj078_1.png]

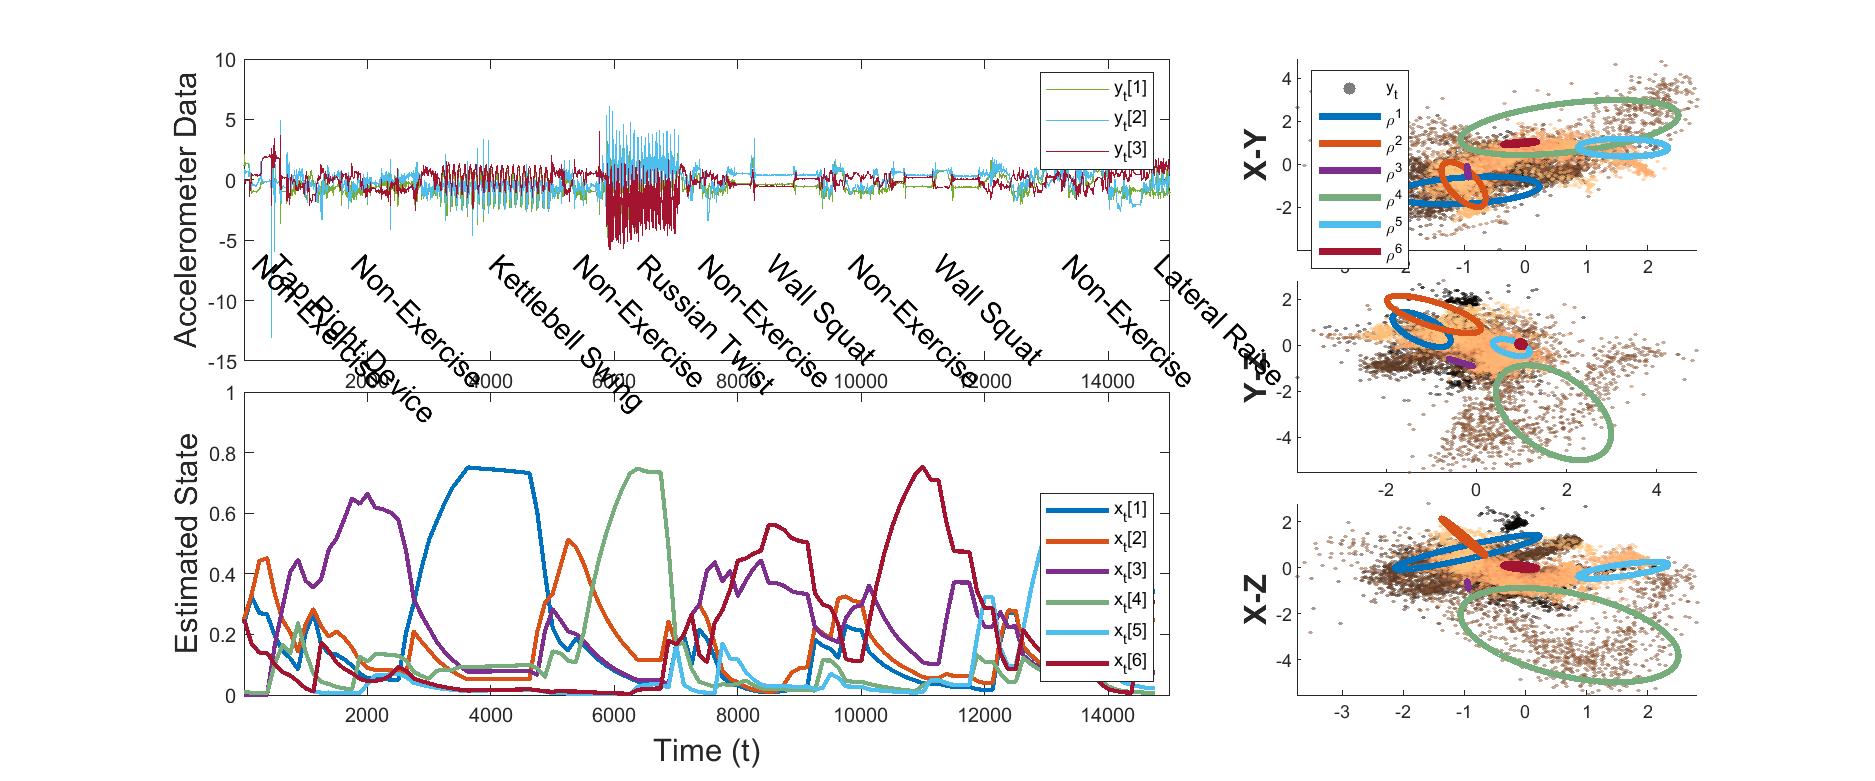

Supplement: Supplementary file 1 [file ebb71045453f38676c40deb9864f811d-Supplemental.zip › Supplement/MSR_GT_Plots/subj079_1.png]

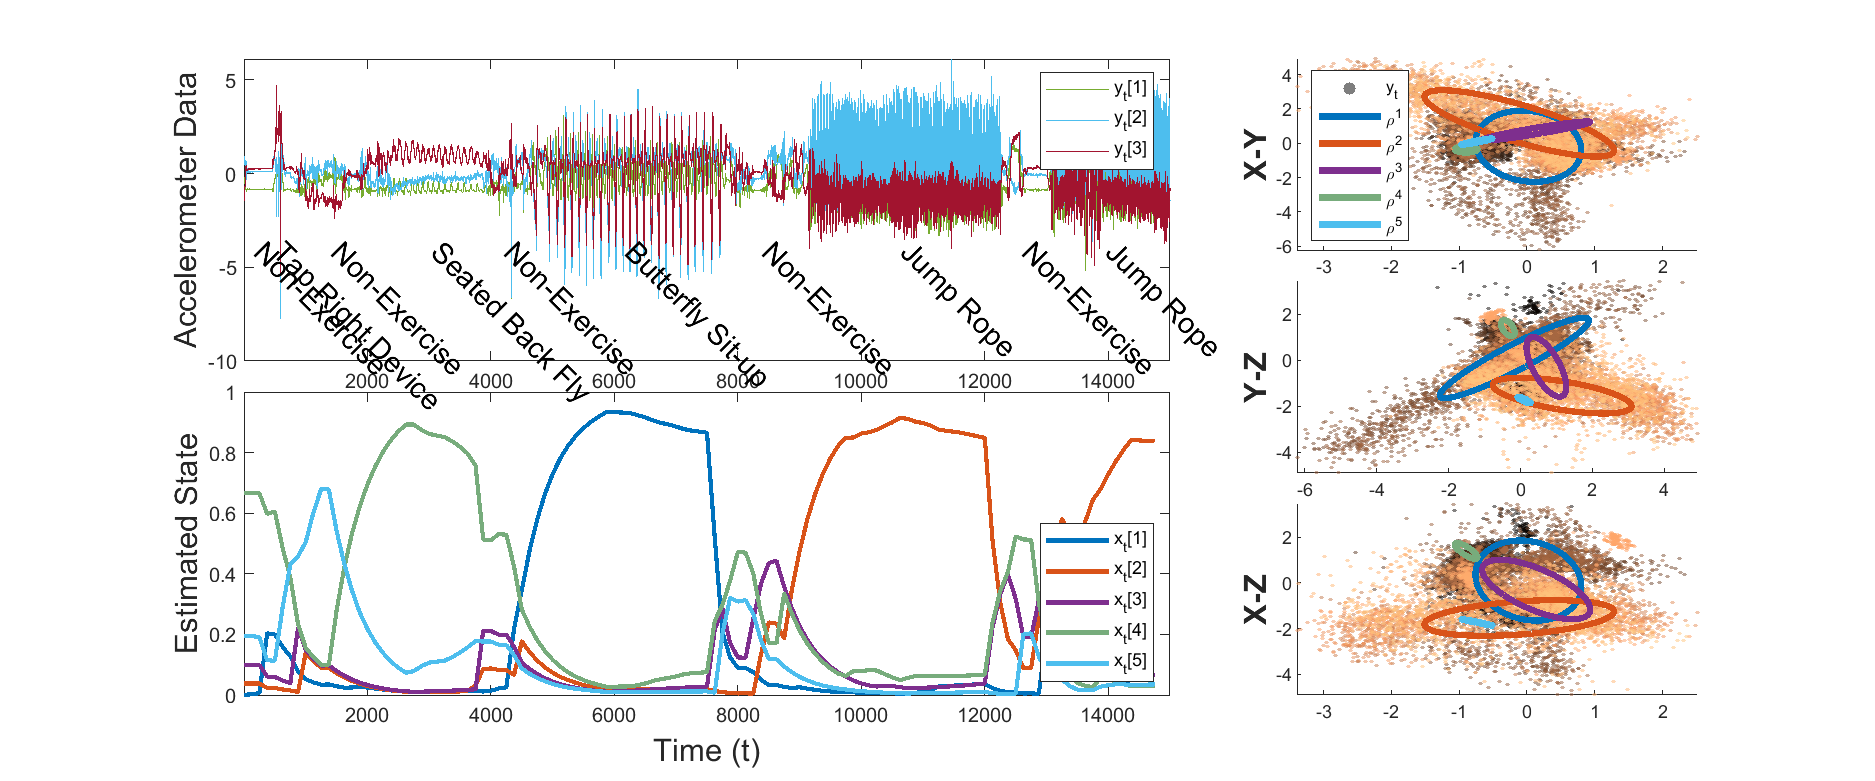

Supplement: Supplementary file 1 [file ebb71045453f38676c40deb9864f811d-Supplemental.zip › Supplement/MSR_GT_Plots/subj080_1.png]

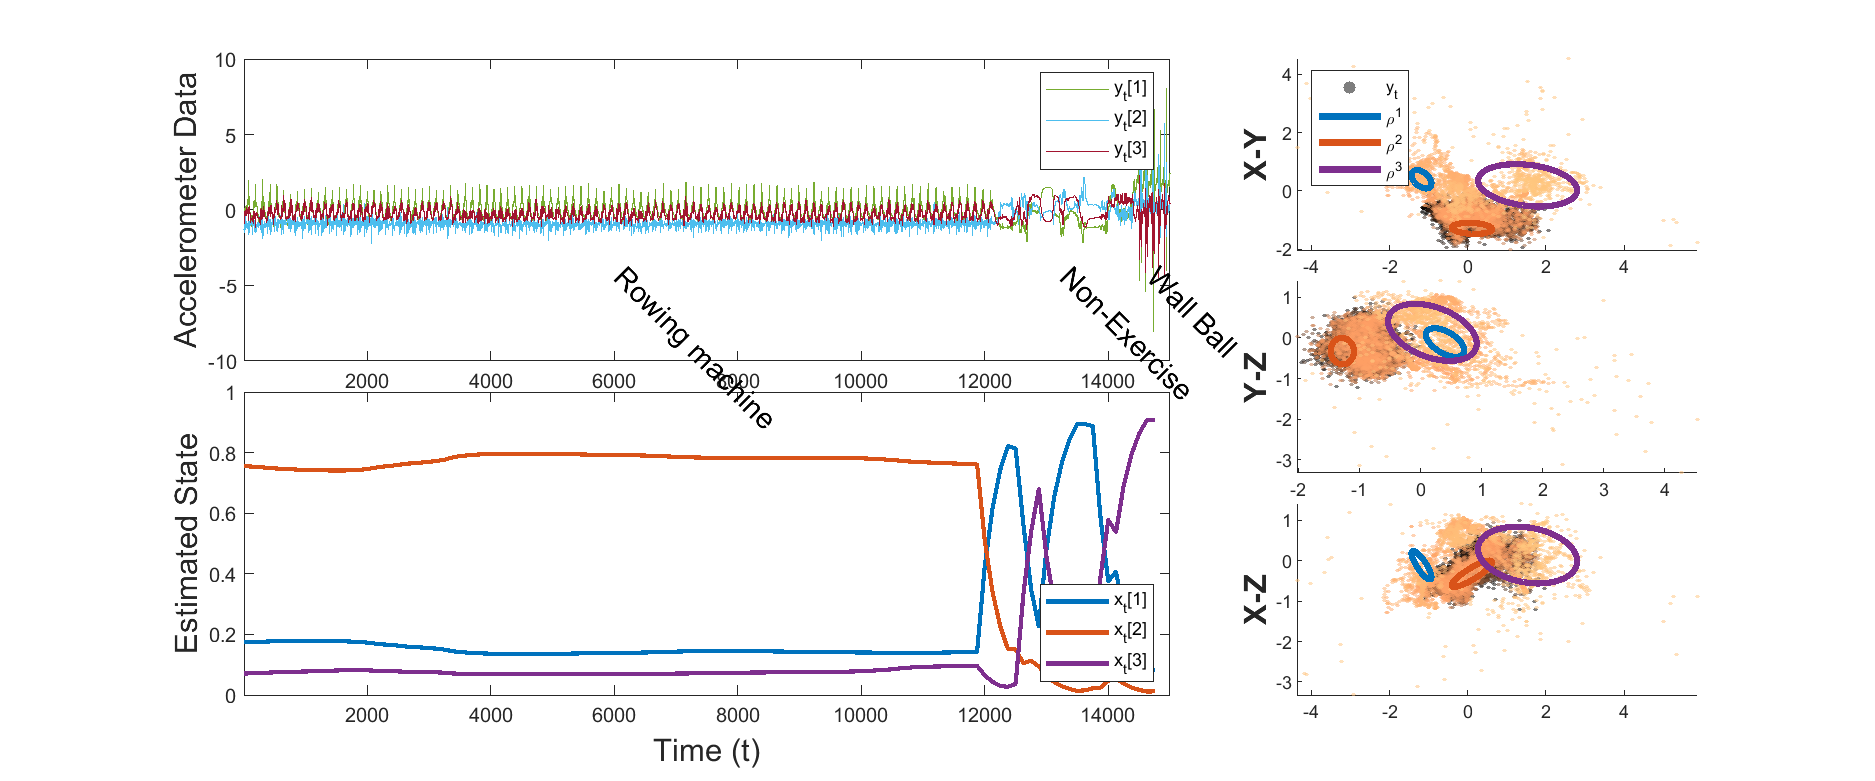

Supplement: Supplementary file 1 [file ebb71045453f38676c40deb9864f811d-Supplemental.zip › Supplement/MSR_GT_Plots/subj080_2.png]

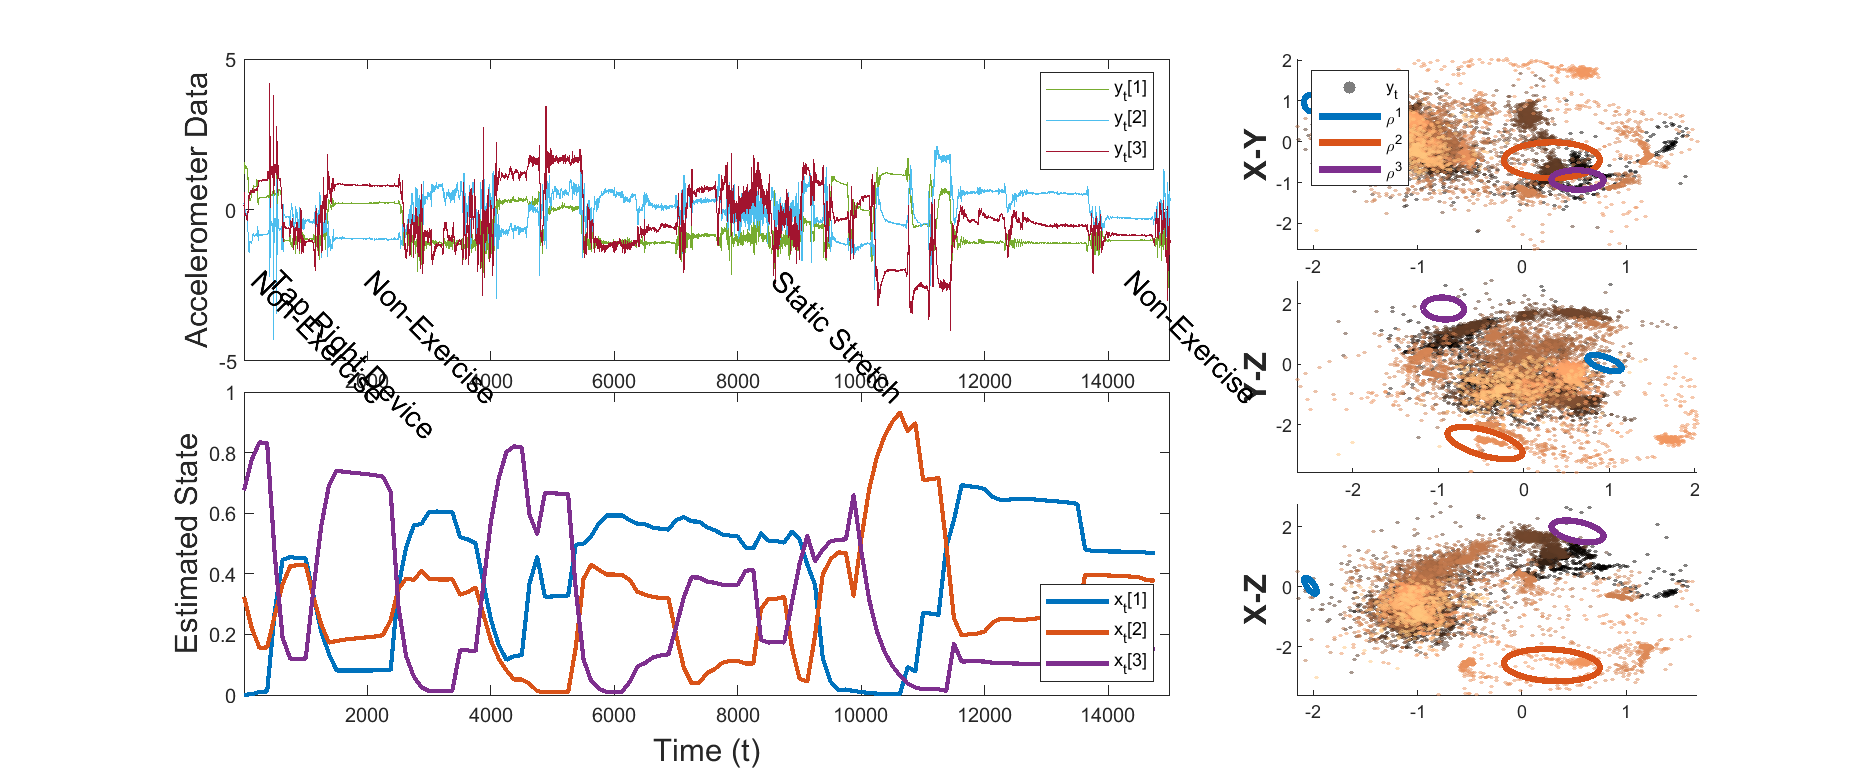

Supplement: Supplementary file 1 [file ebb71045453f38676c40deb9864f811d-Supplemental.zip › Supplement/MSR_GT_Plots/subj081_1.png]

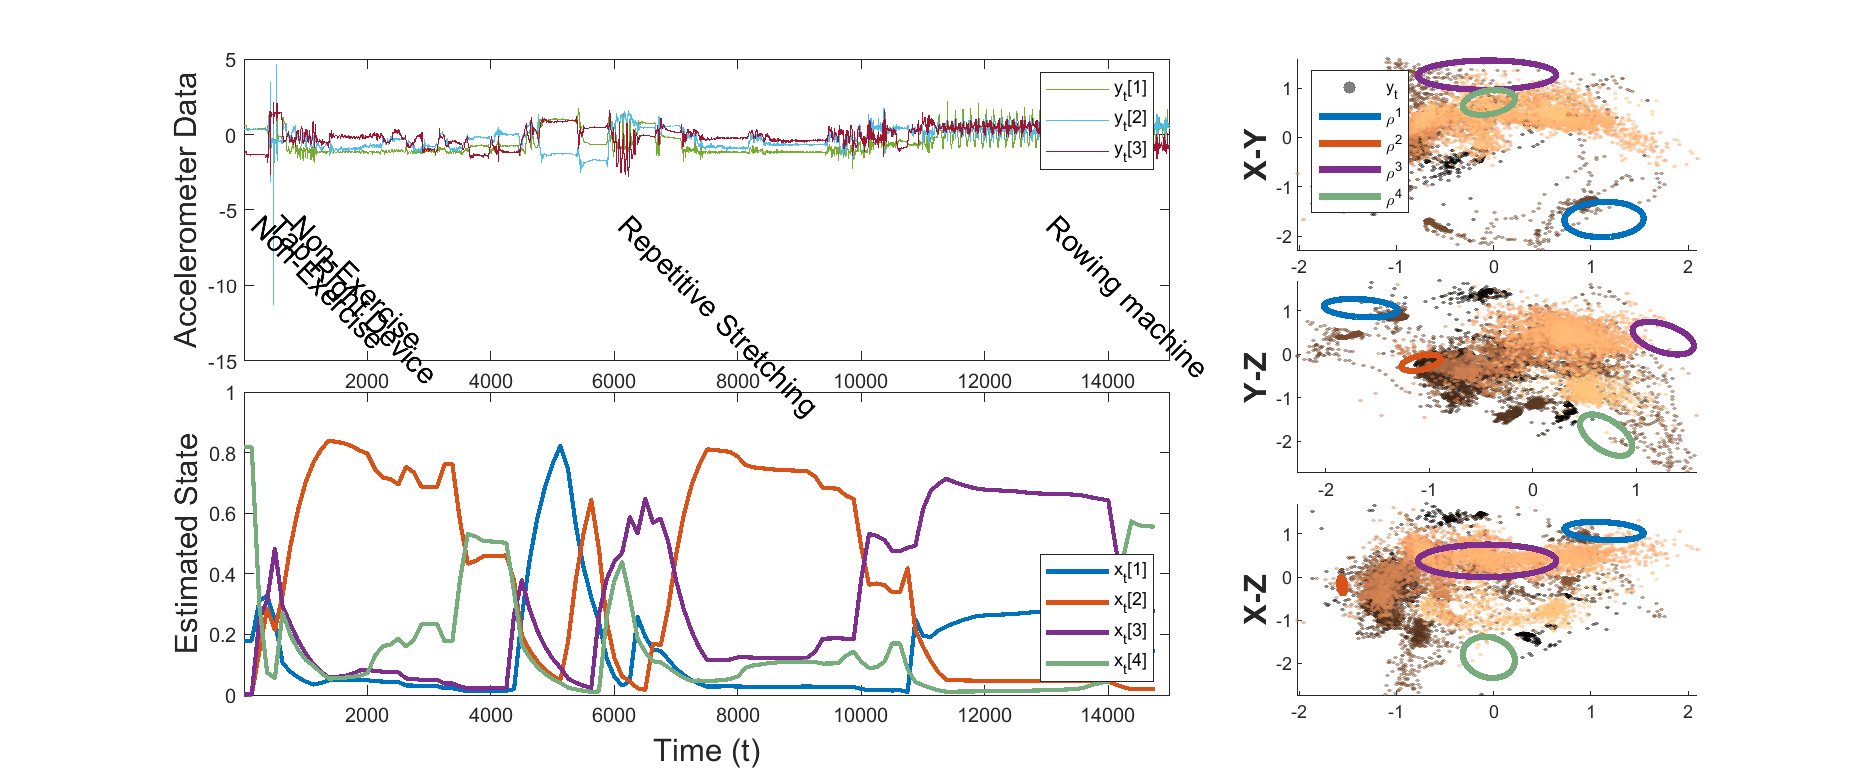

Supplement: Supplementary file 1 [file ebb71045453f38676c40deb9864f811d-Supplemental.zip › Supplement/MSR_GT_Plots/subj081_2.png]

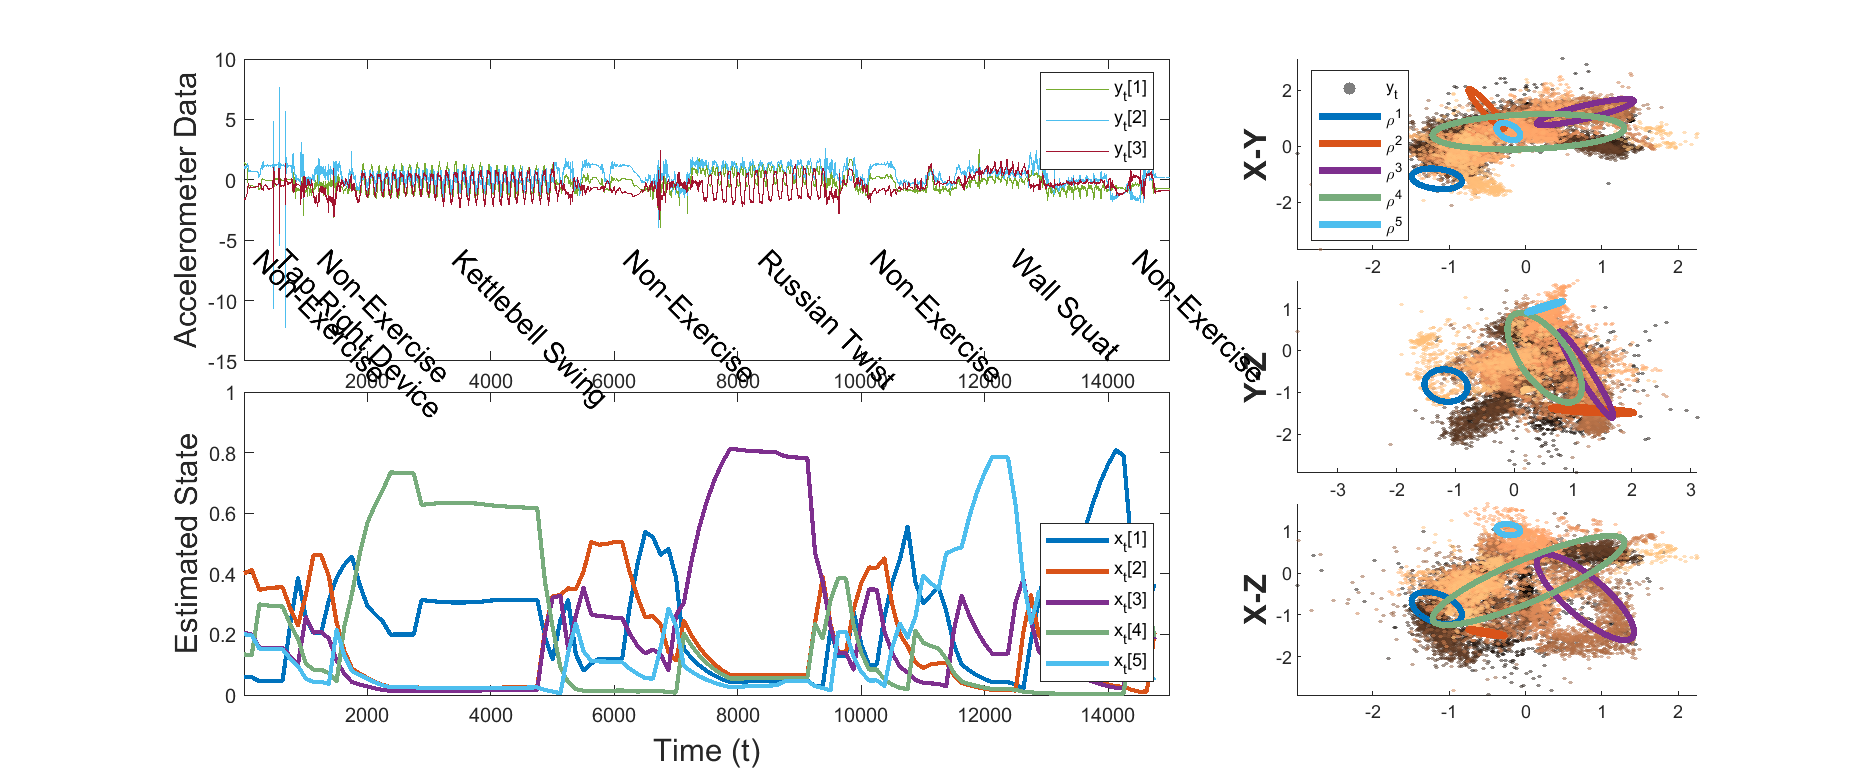

Supplement: Supplementary file 1 [file ebb71045453f38676c40deb9864f811d-Supplemental.zip › Supplement/MSR_GT_Plots/subj082_1.png]

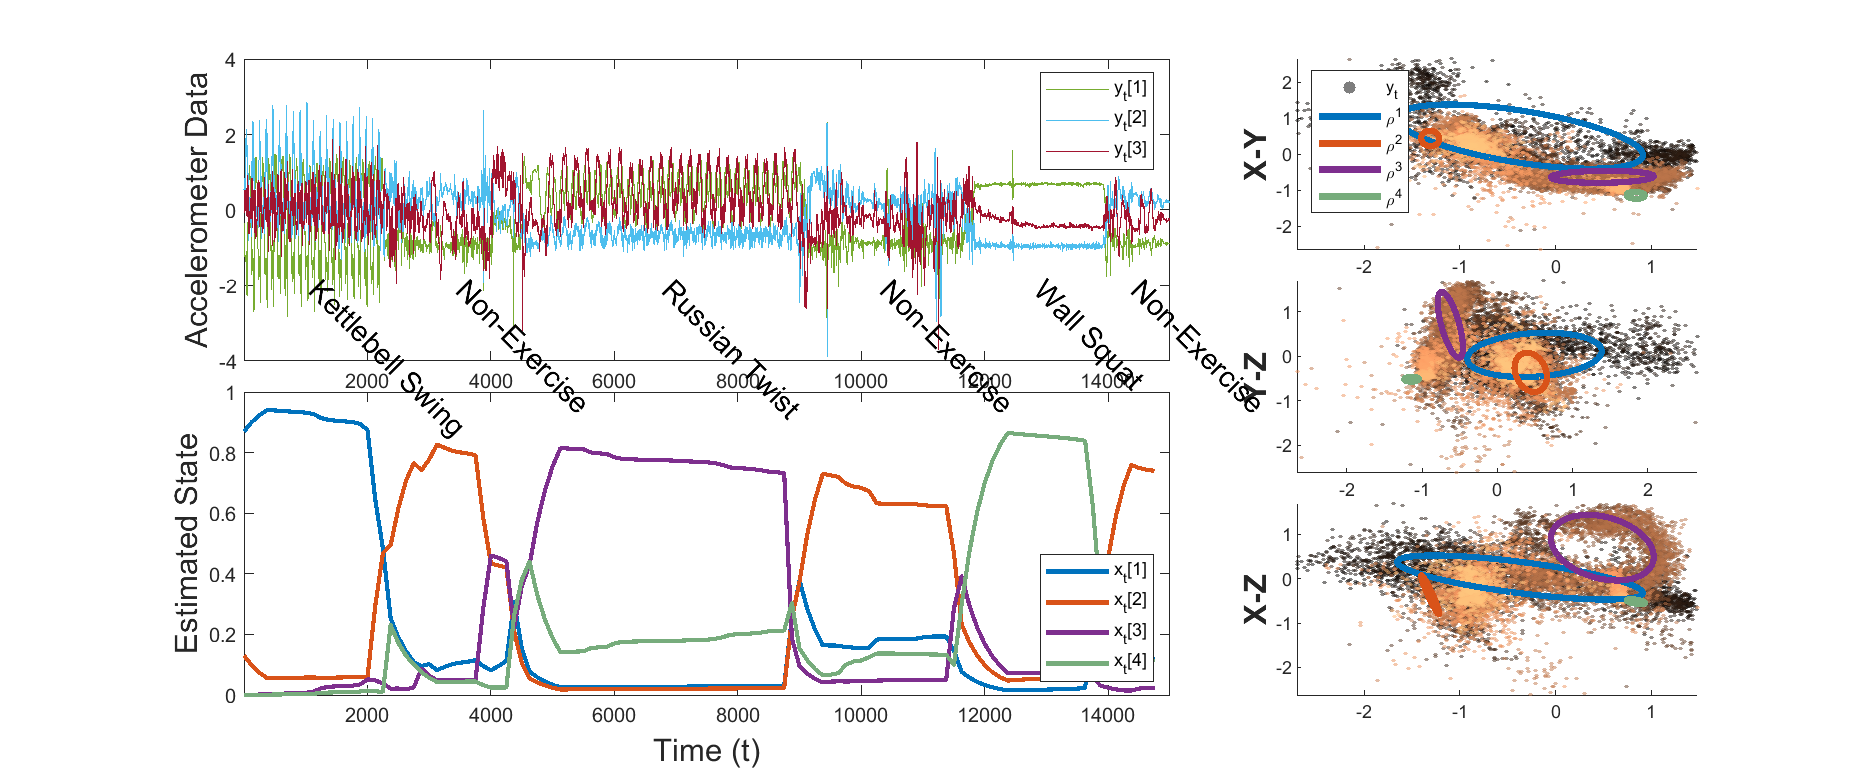

Supplement: Supplementary file 1 [file ebb71045453f38676c40deb9864f811d-Supplemental.zip › Supplement/MSR_GT_Plots/subj083_1.png]

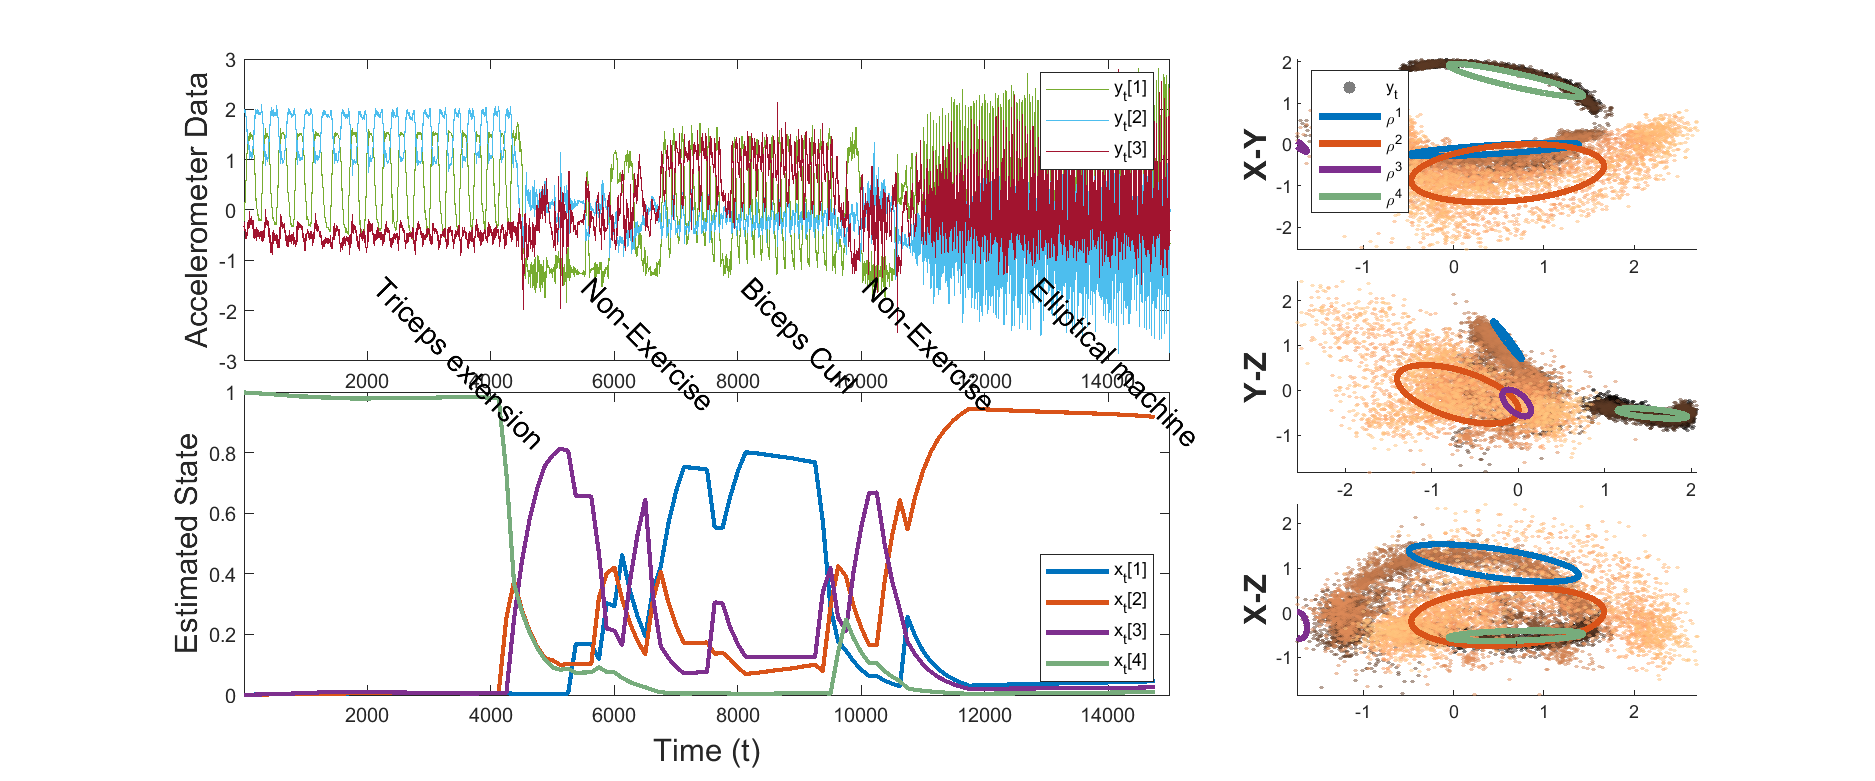

Supplement: Supplementary file 1 [file ebb71045453f38676c40deb9864f811d-Supplemental.zip › Supplement/MSR_GT_Plots/subj083_2.png]

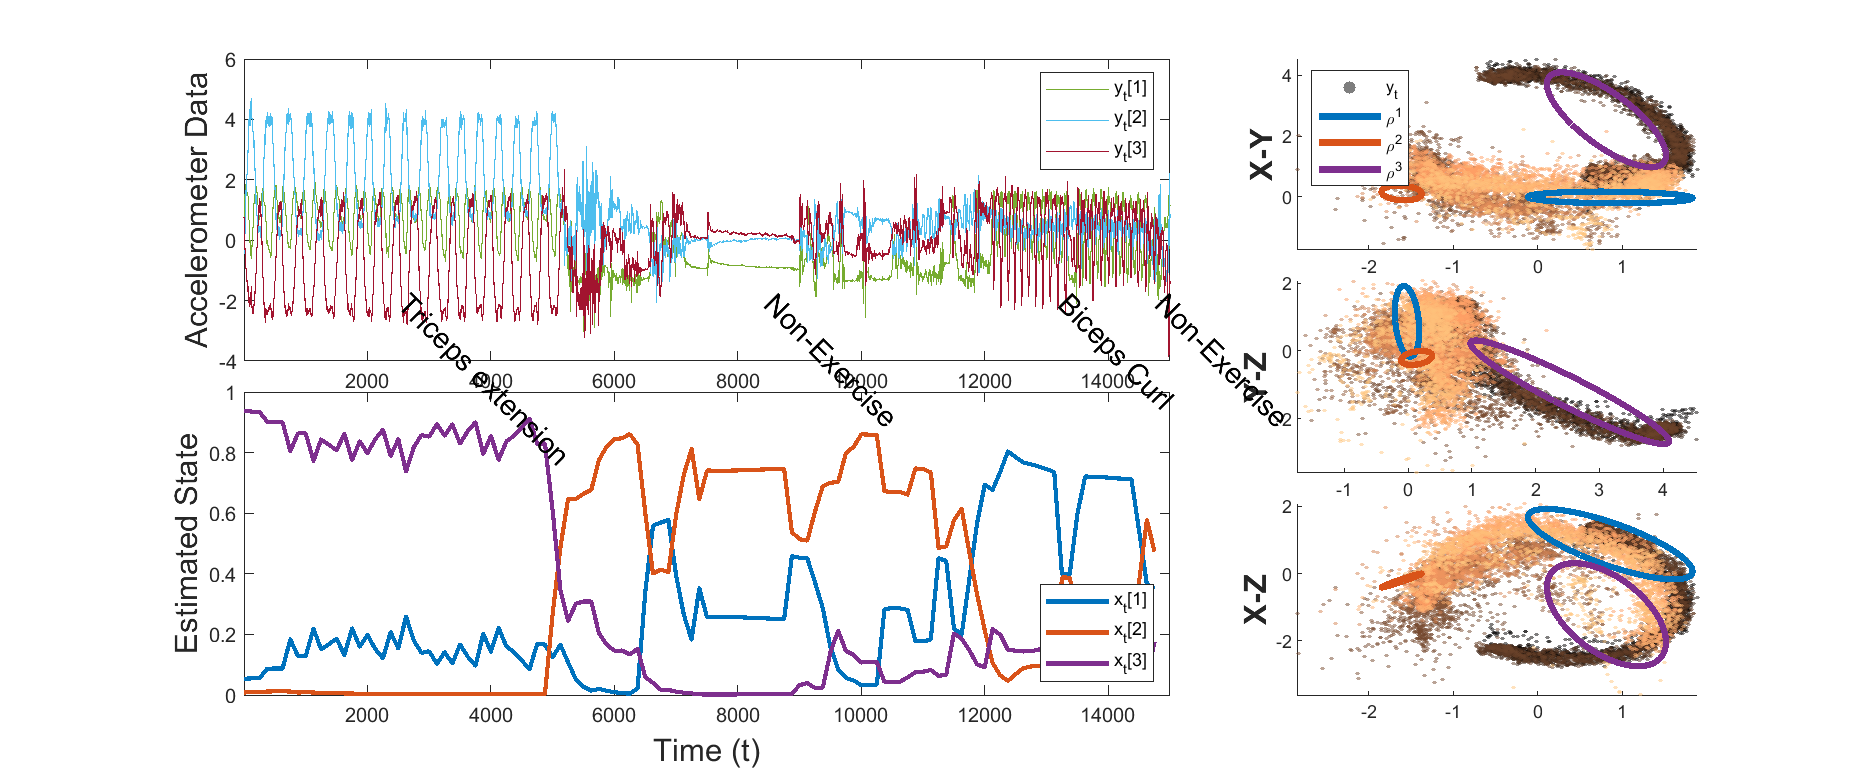

Supplement: Supplementary file 1 [file ebb71045453f38676c40deb9864f811d-Supplemental.zip › Supplement/MSR_GT_Plots/subj084_1.png]

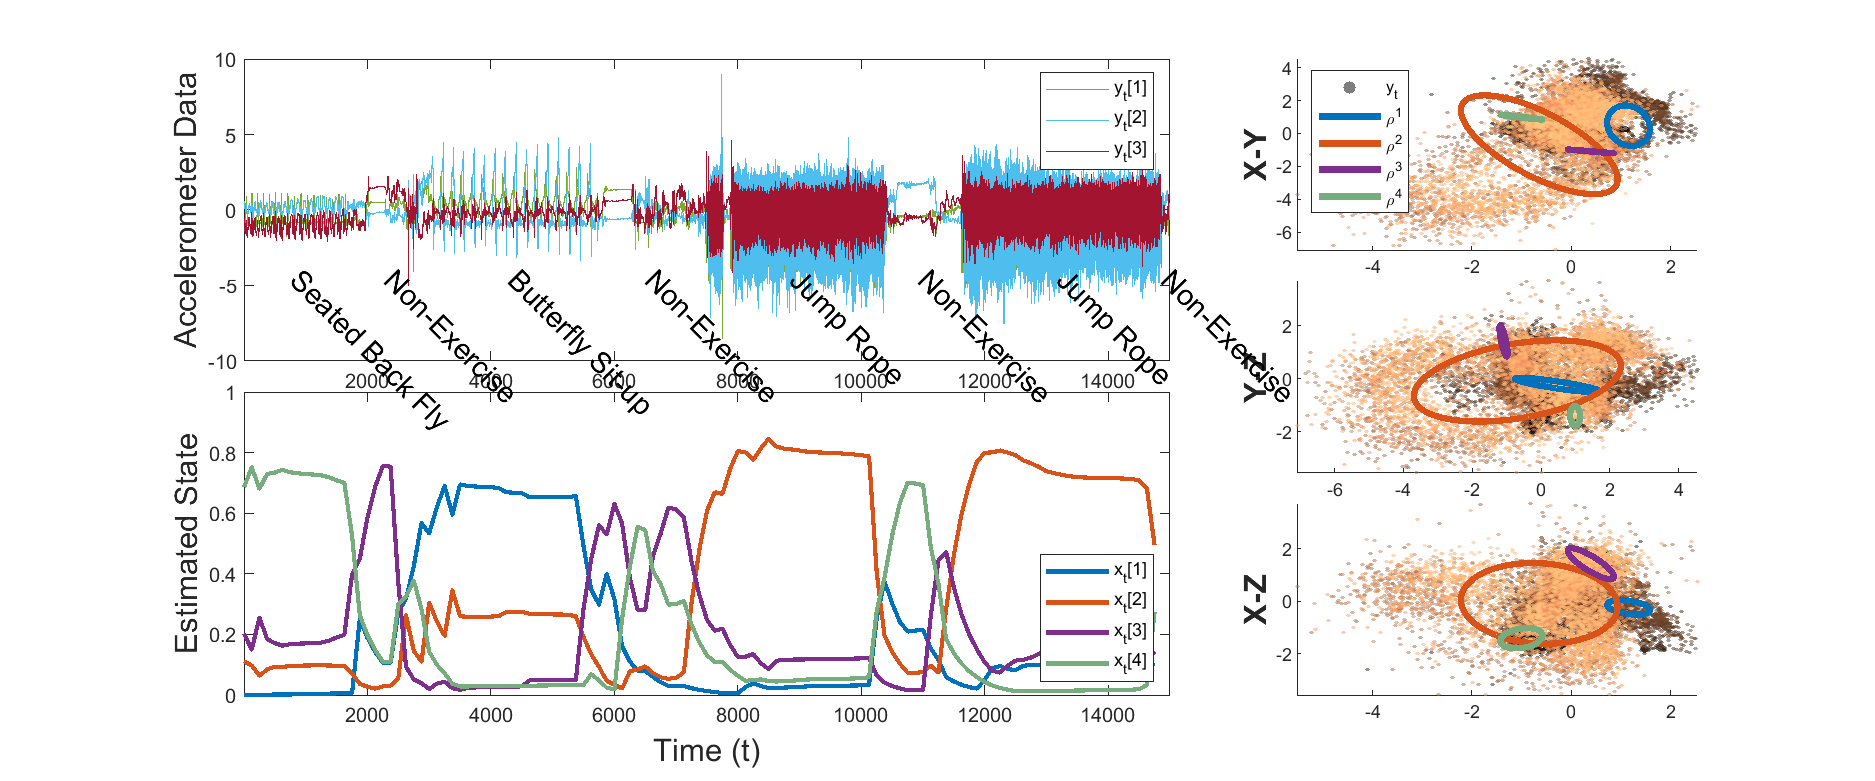

Supplement: Supplementary file 1 [file ebb71045453f38676c40deb9864f811d-Supplemental.zip › Supplement/MSR_GT_Plots/subj085_1.png]

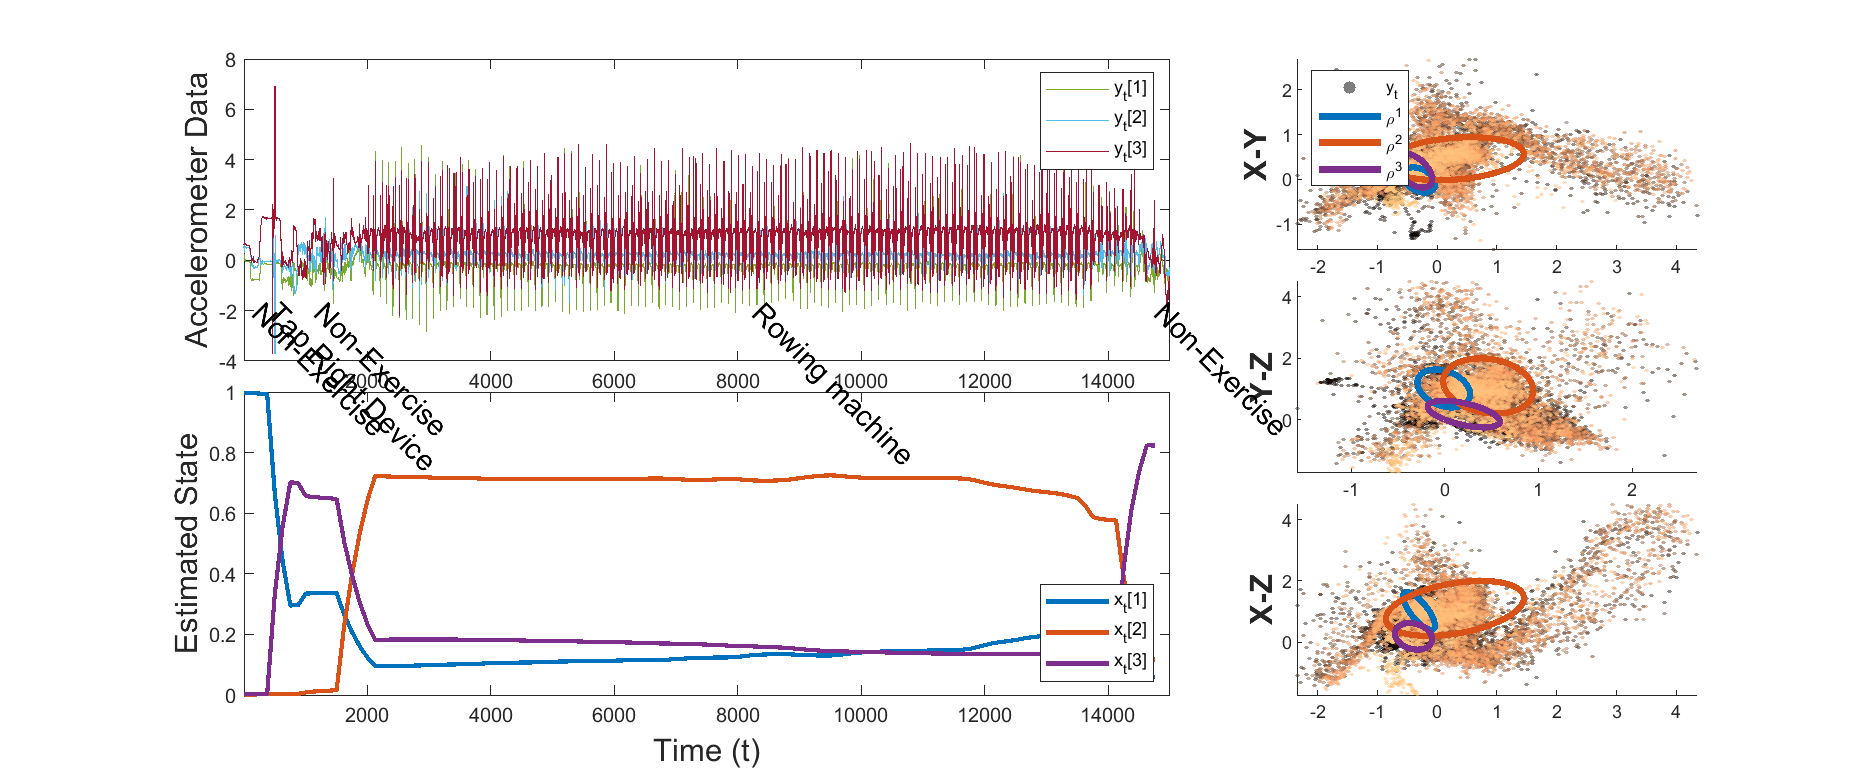

Supplement: Supplementary file 1 [file ebb71045453f38676c40deb9864f811d-Supplemental.zip › Supplement/MSR_GT_Plots/subj086_1.png]

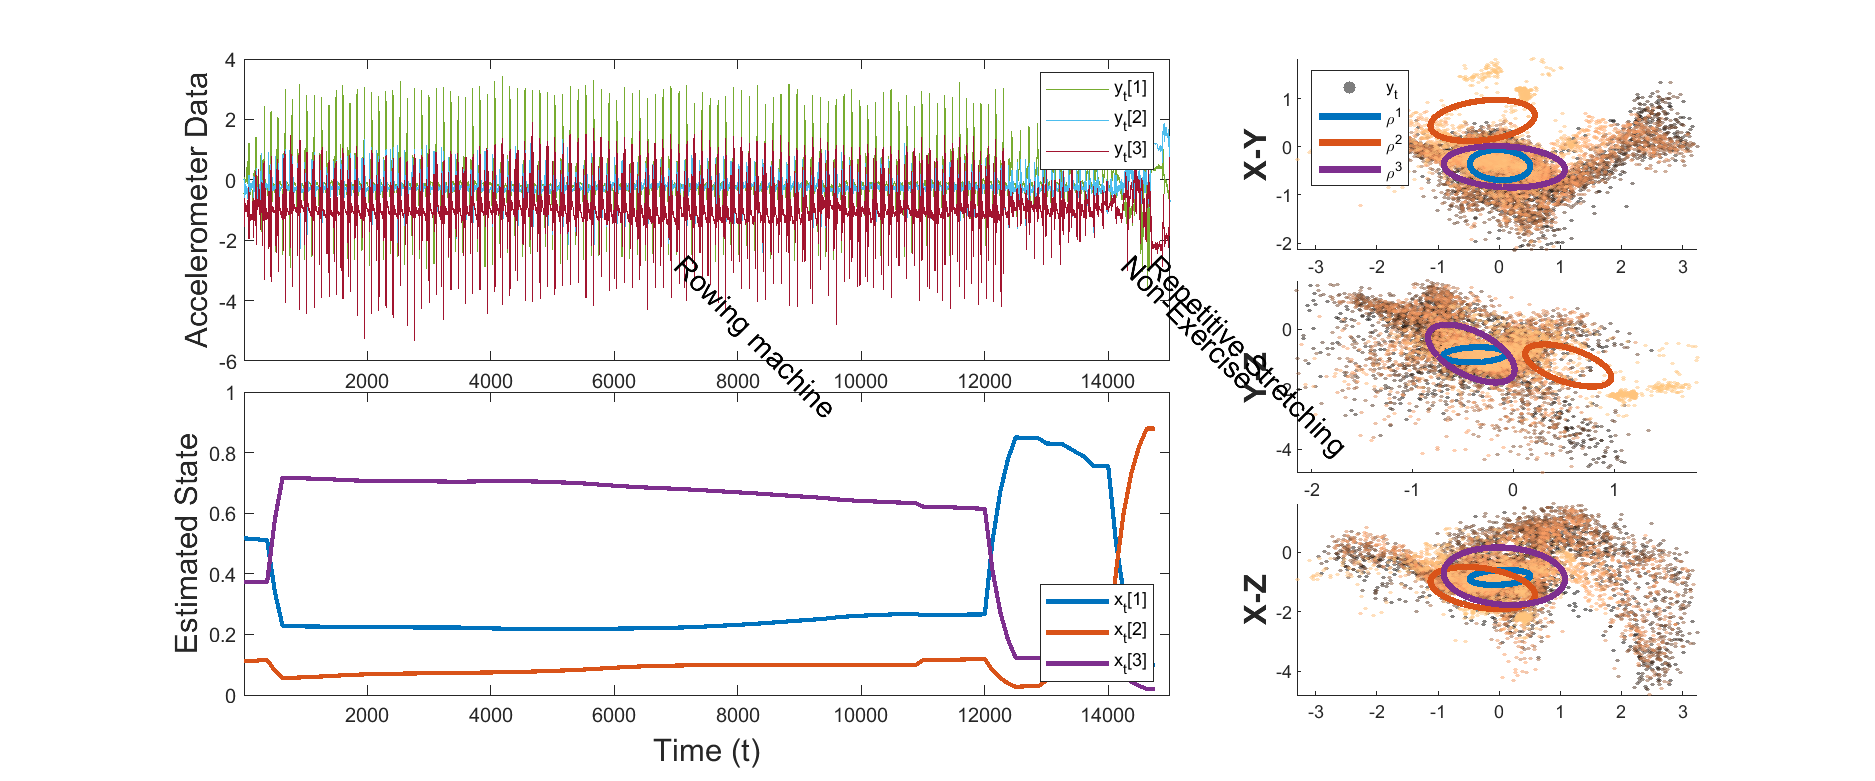

Supplement: Supplementary file 1 [file ebb71045453f38676c40deb9864f811d-Supplemental.zip › Supplement/MSR_GT_Plots/subj086_2.png]

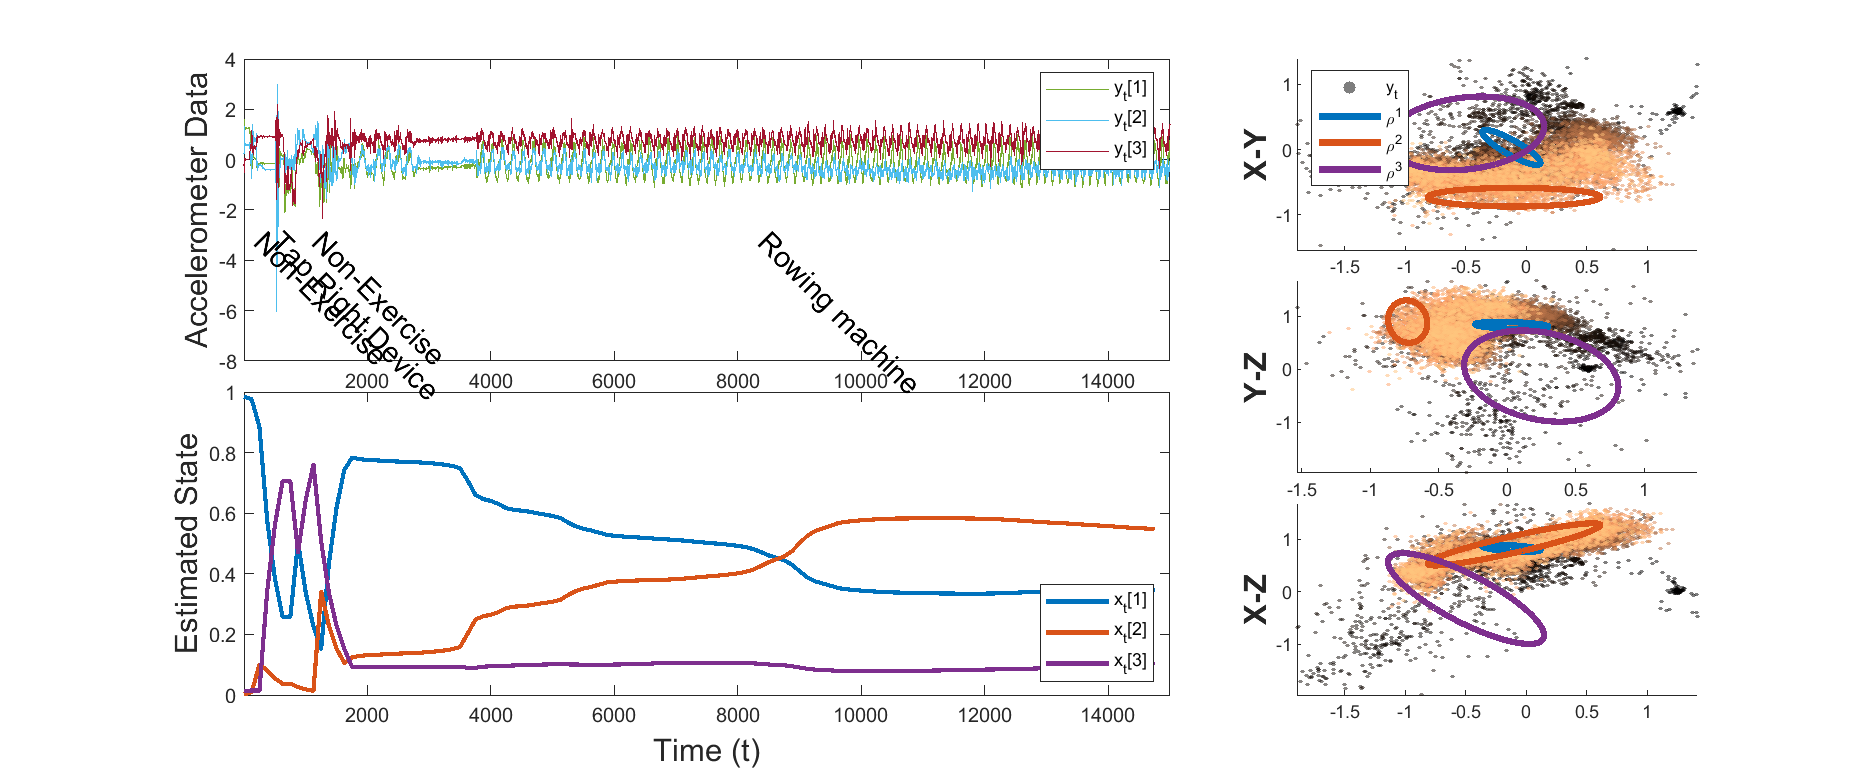

Supplement: Supplementary file 1 [file ebb71045453f38676c40deb9864f811d-Supplemental.zip › Supplement/MSR_GT_Plots/subj087_1.png]

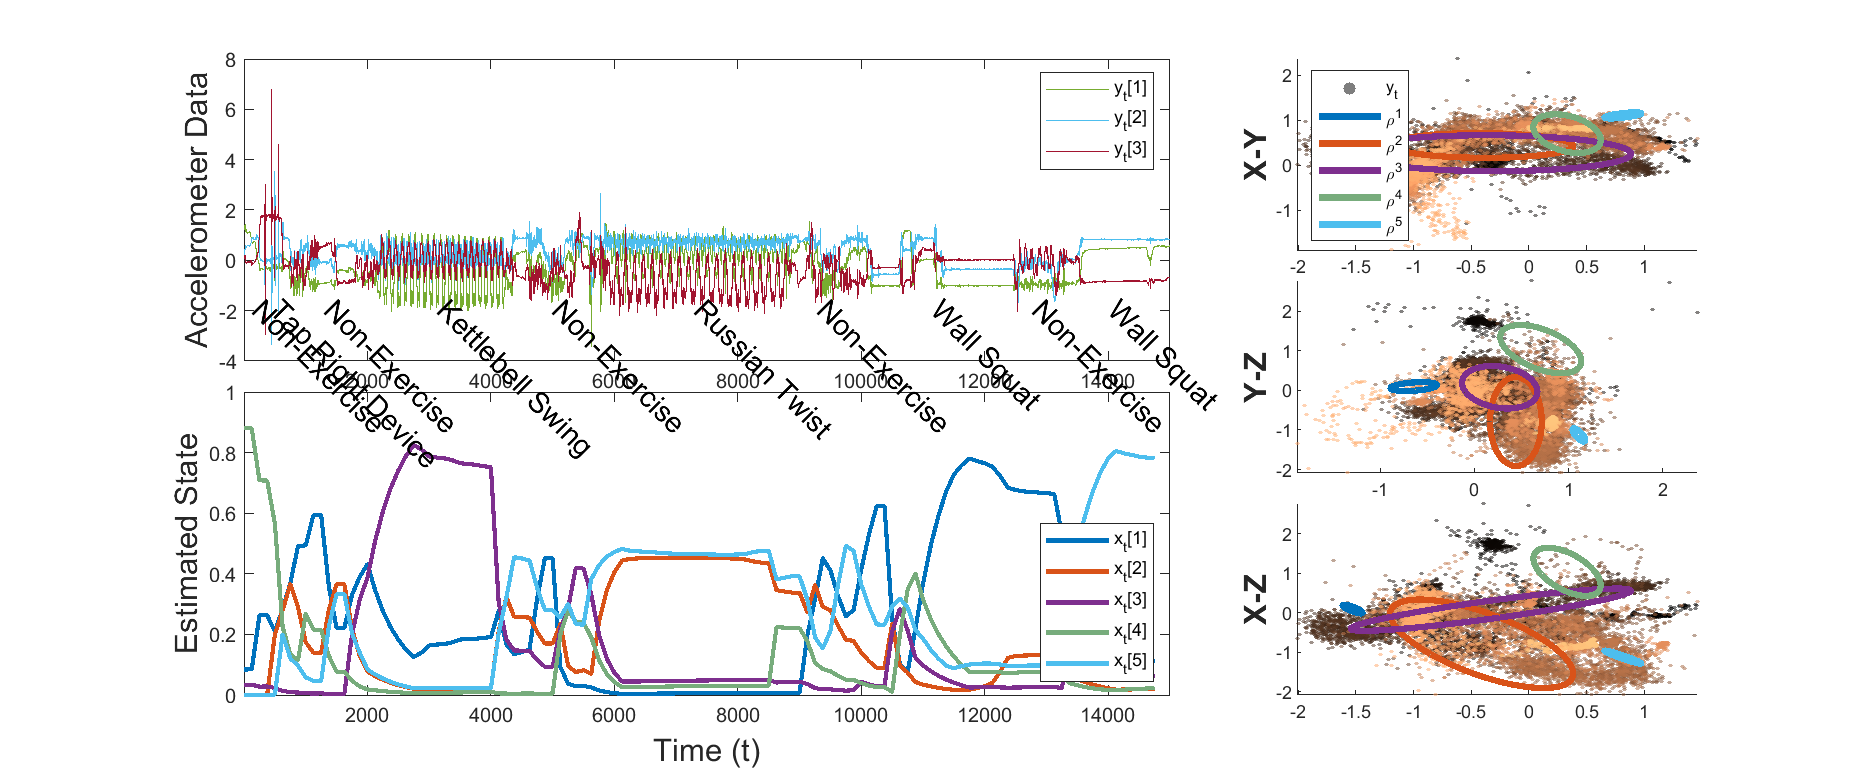

Supplement: Supplementary file 1 [file ebb71045453f38676c40deb9864f811d-Supplemental.zip › Supplement/MSR_GT_Plots/subj088_1.png]

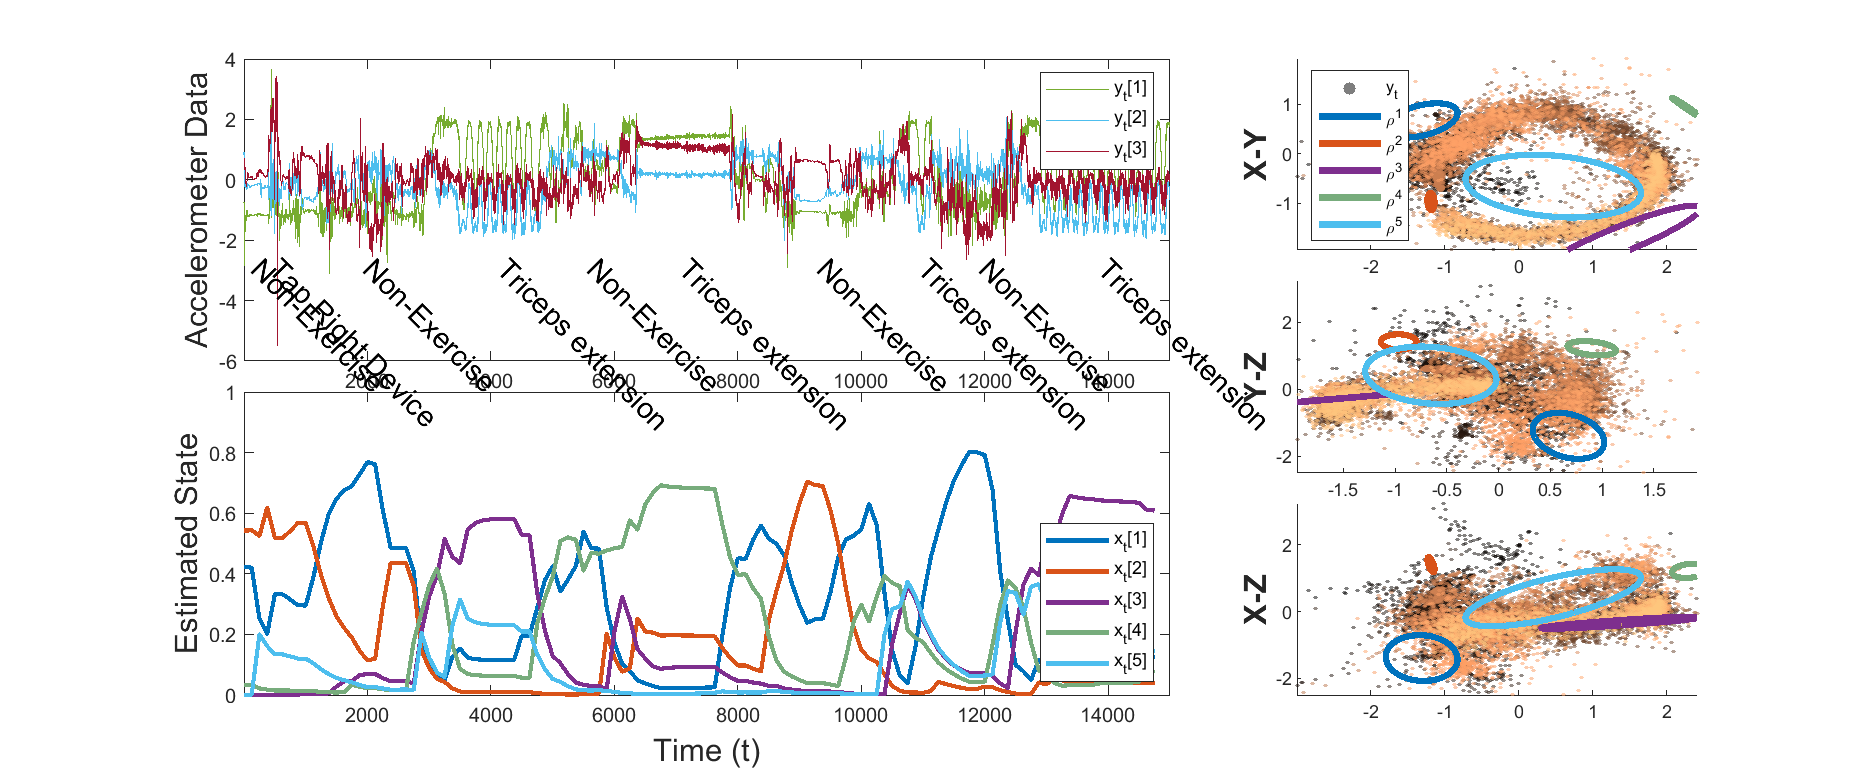

Supplement: Supplementary file 1 [file ebb71045453f38676c40deb9864f811d-Supplemental.zip › Supplement/MSR_GT_Plots/subj089_1.png]

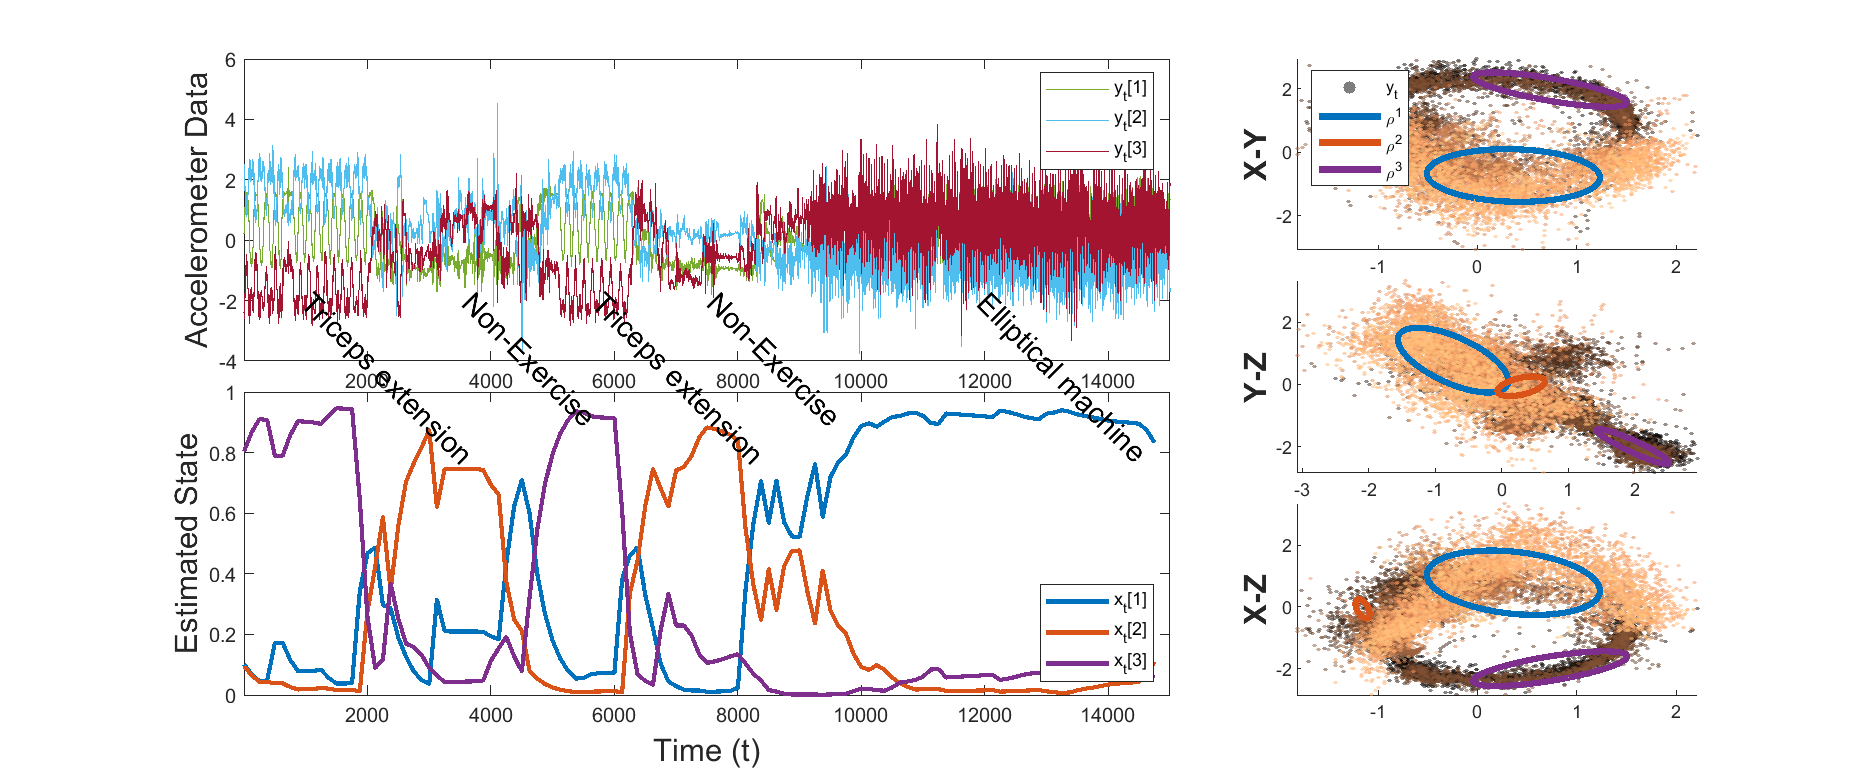

Supplement: Supplementary file 1 [file ebb71045453f38676c40deb9864f811d-Supplemental.zip › Supplement/MSR_GT_Plots/subj089_2.png]

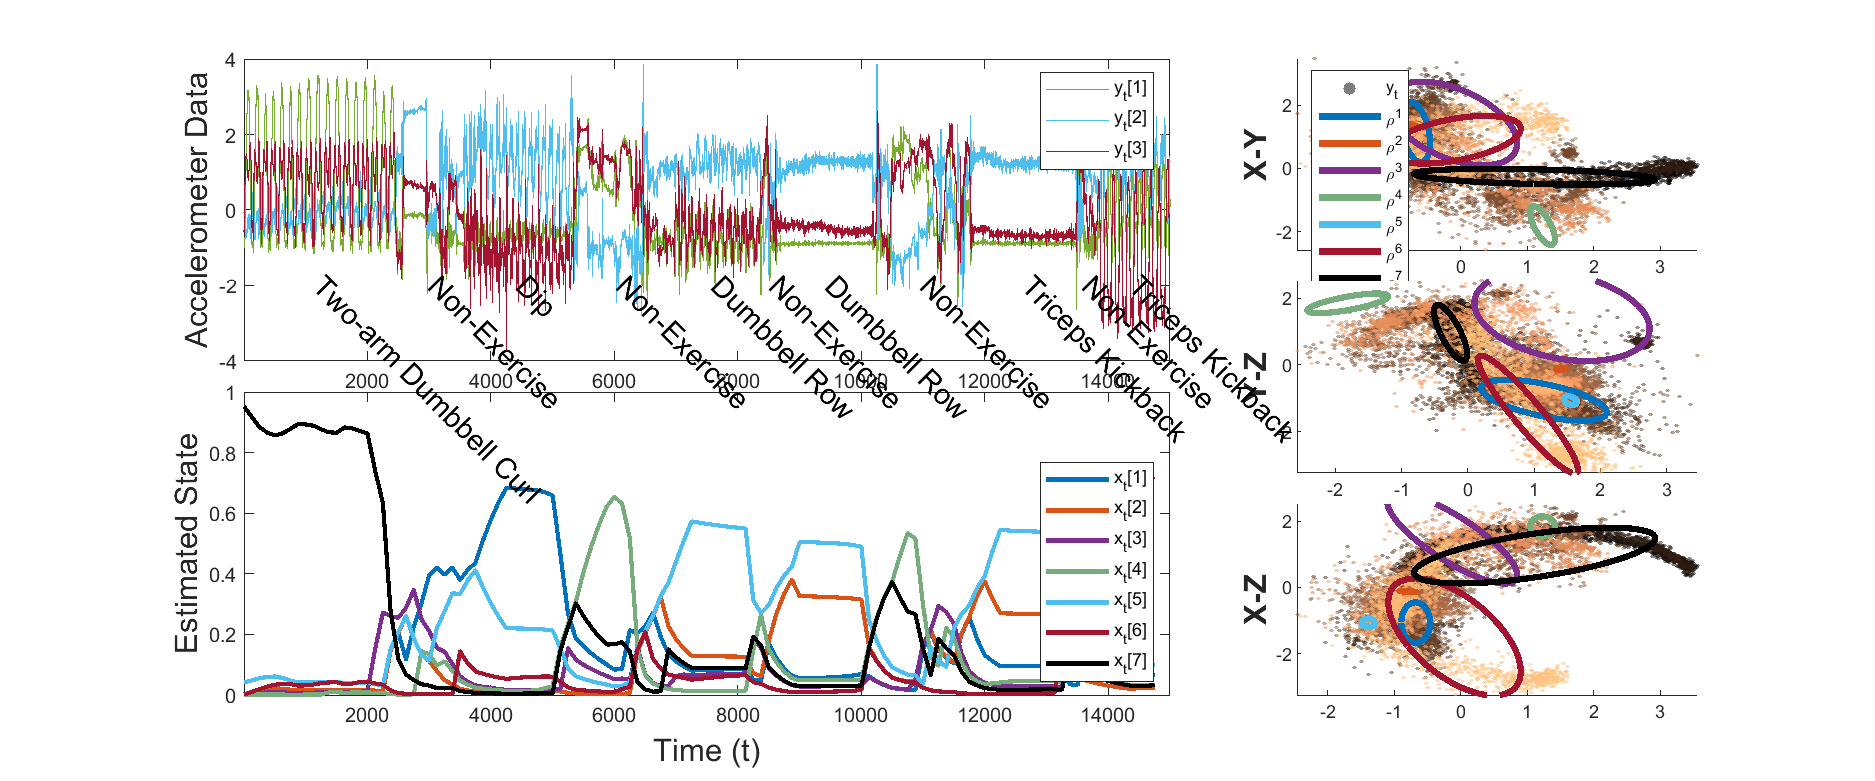

Supplement: Supplementary file 1 [file ebb71045453f38676c40deb9864f811d-Supplemental.zip › Supplement/MSR_GT_Plots/subj090_1.png]

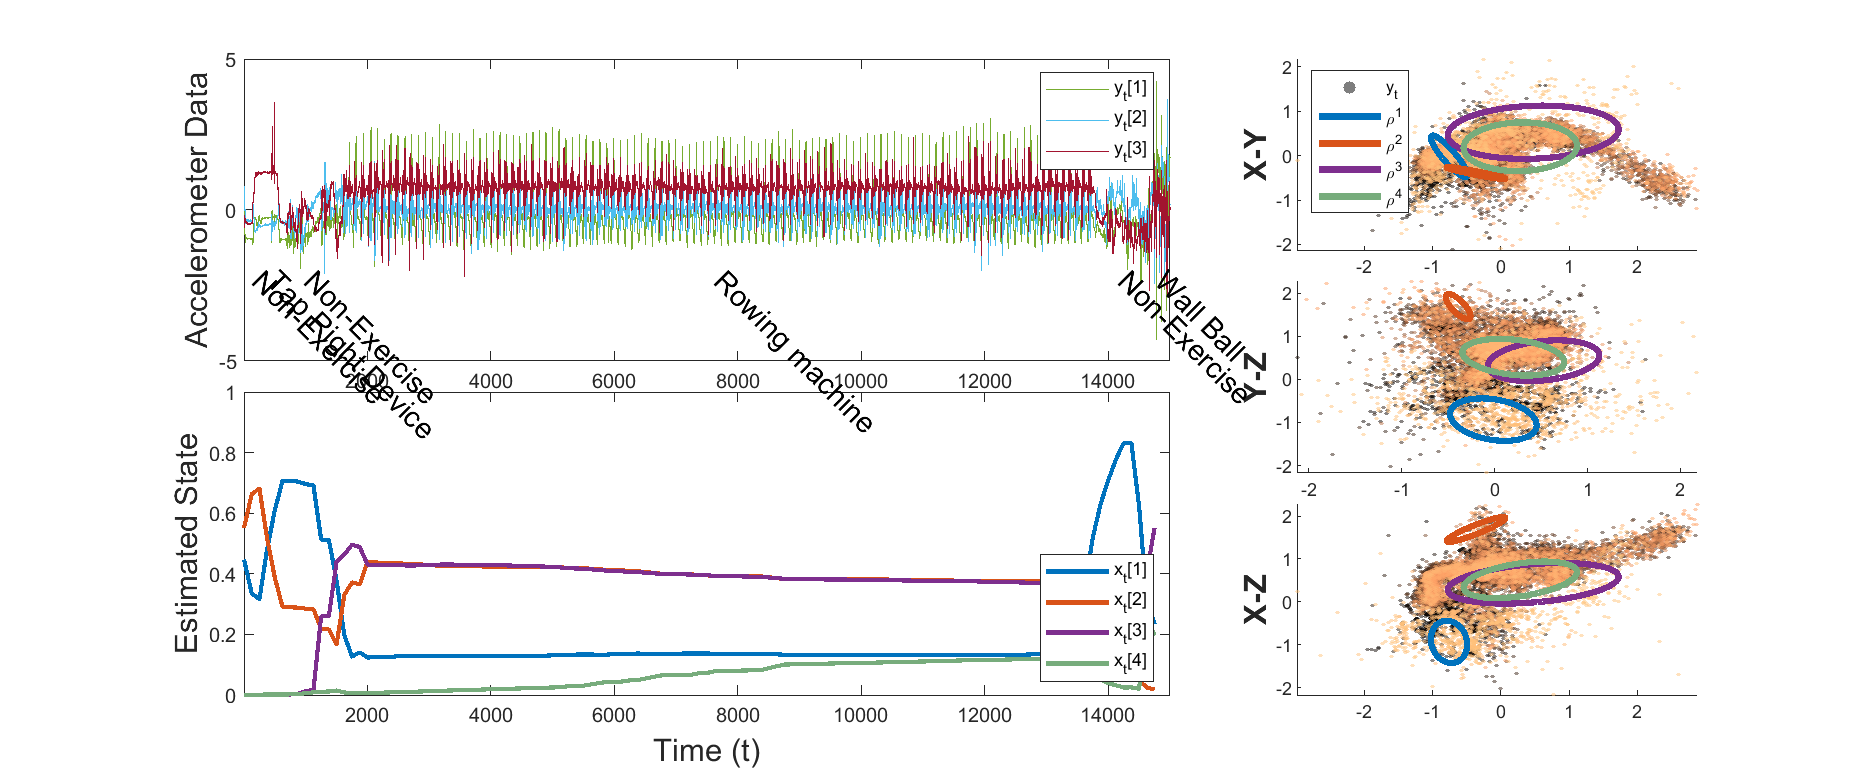

Supplement: Supplementary file 1 [file ebb71045453f38676c40deb9864f811d-Supplemental.zip › Supplement/MSR_GT_Plots/subj091_1.png]

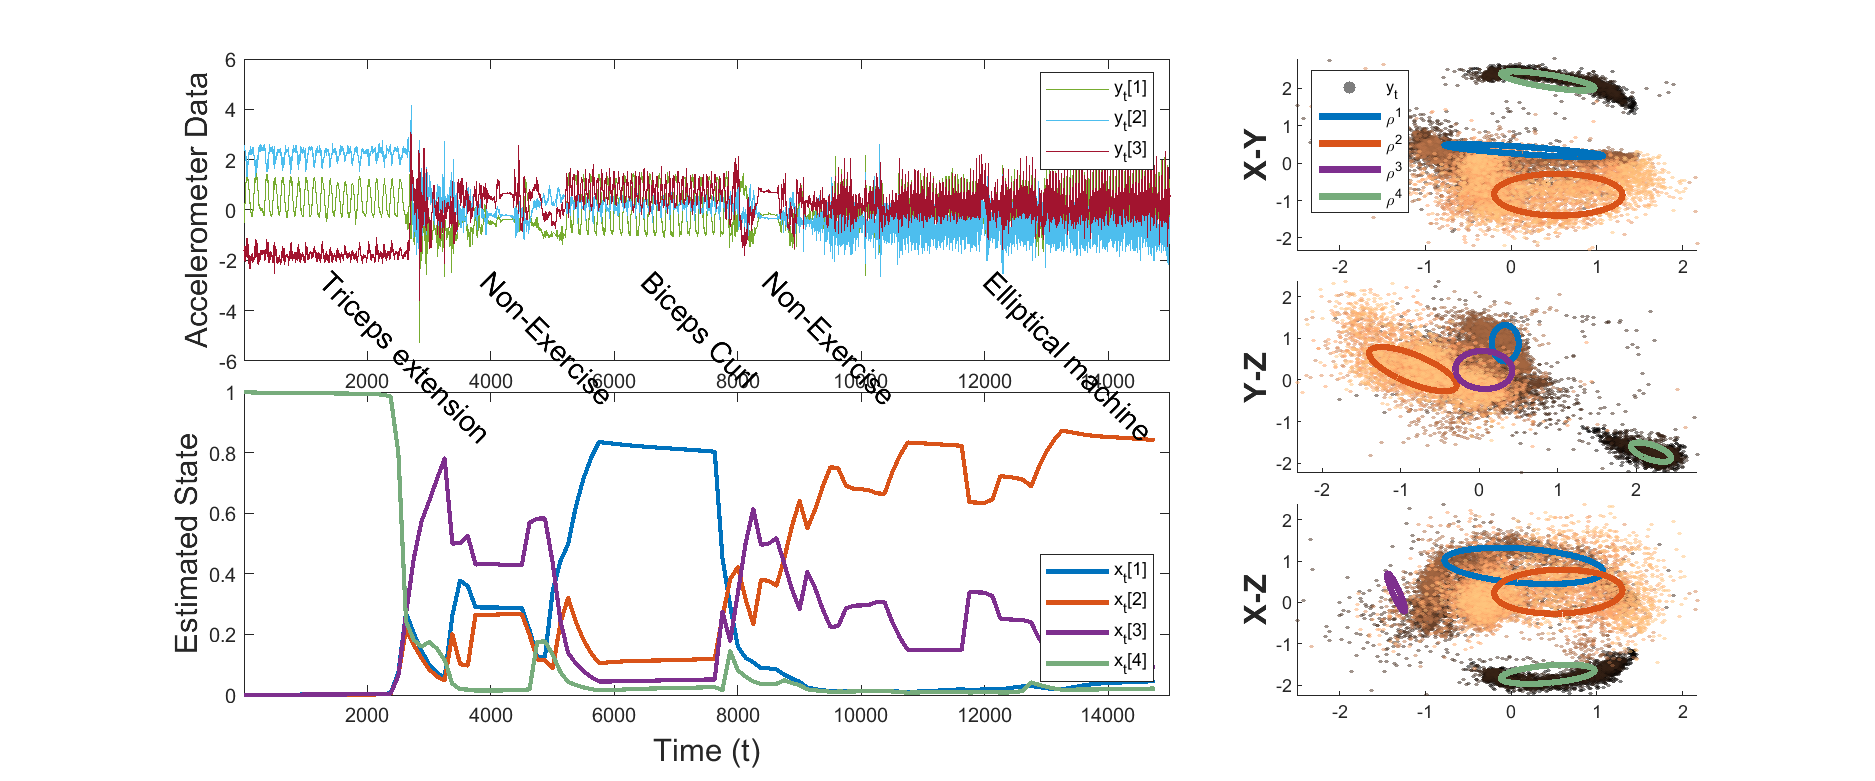

Supplement: Supplementary file 1 [file ebb71045453f38676c40deb9864f811d-Supplemental.zip › Supplement/MSR_GT_Plots/subj092_1.png]

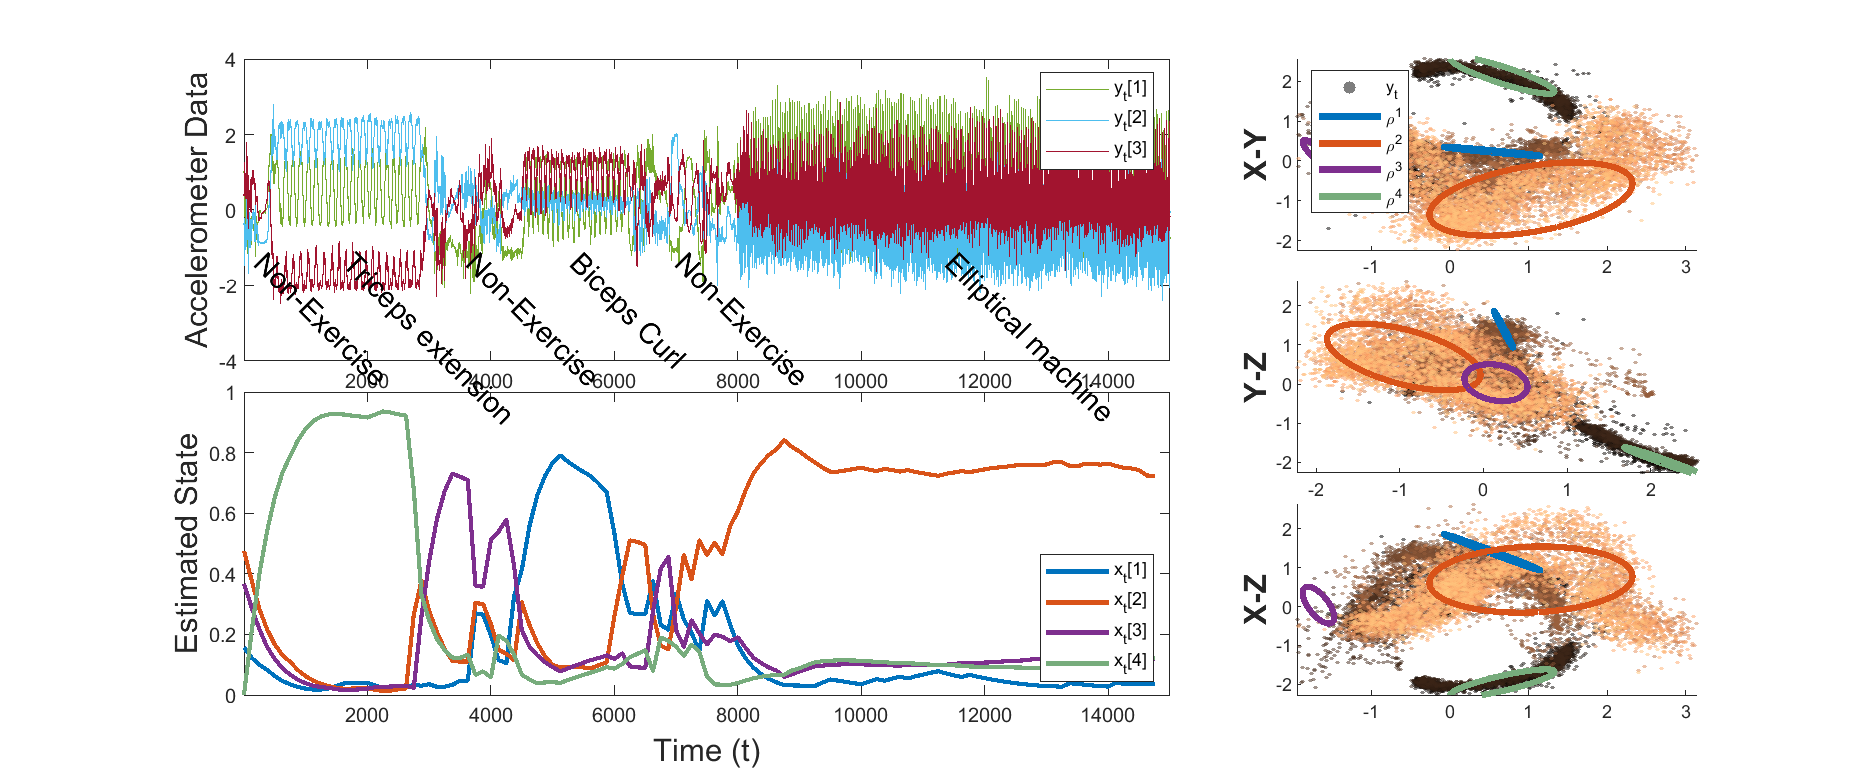

Supplement: Supplementary file 1 [file ebb71045453f38676c40deb9864f811d-Supplemental.zip › Supplement/MSR_GT_Plots/subj093_1.png]

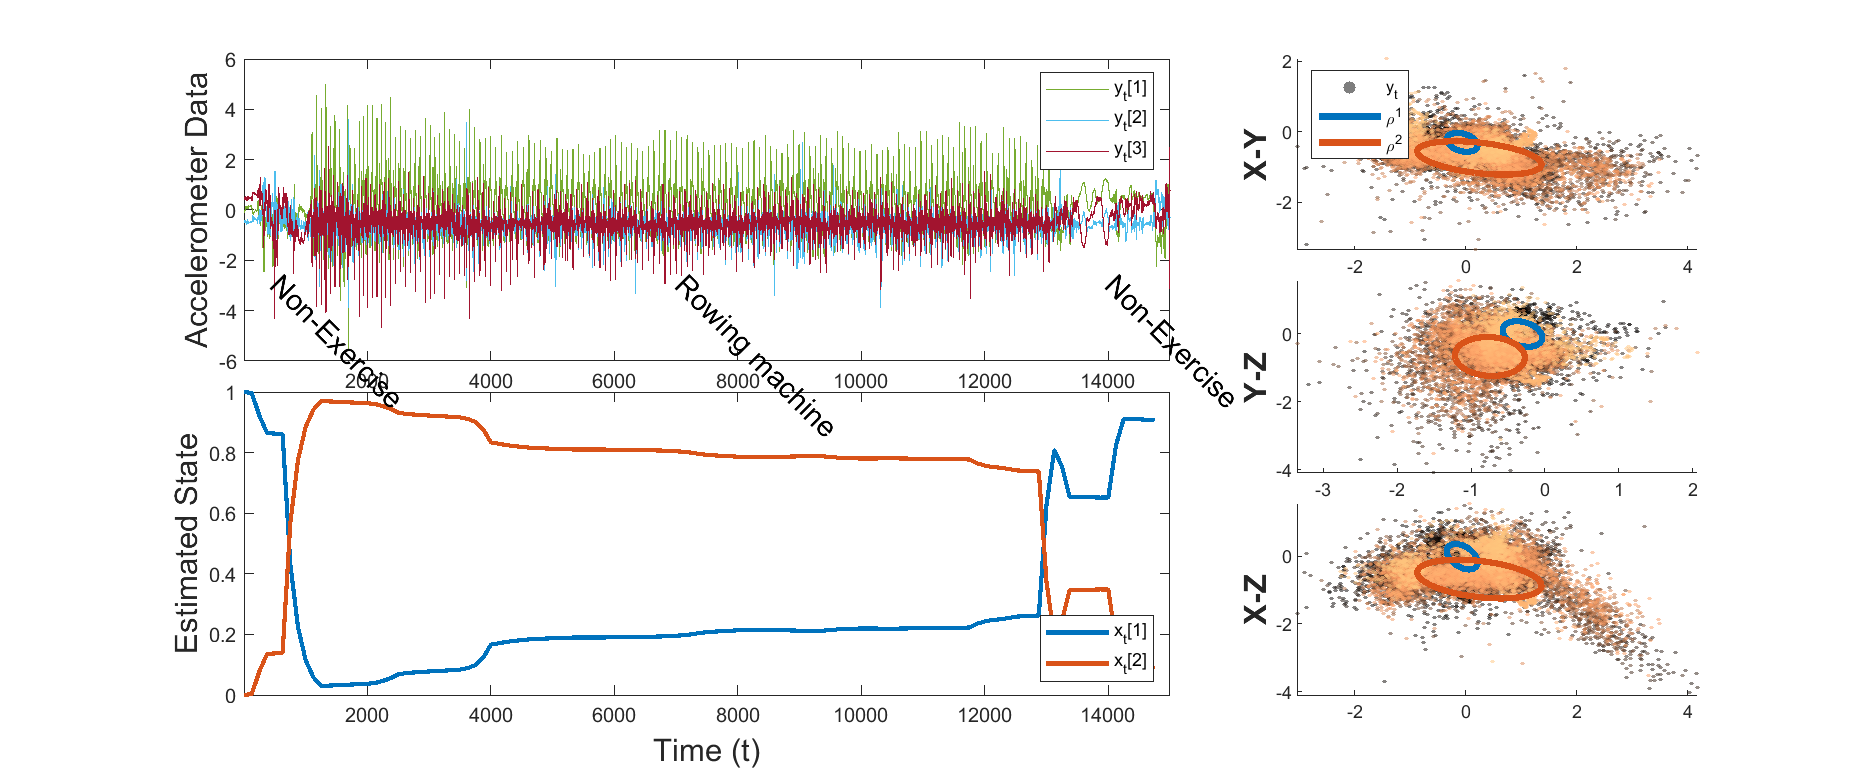

Supplement: Supplementary file 1 [file ebb71045453f38676c40deb9864f811d-Supplemental.zip › Supplement/MSR_GT_Plots/subj094_1.png]

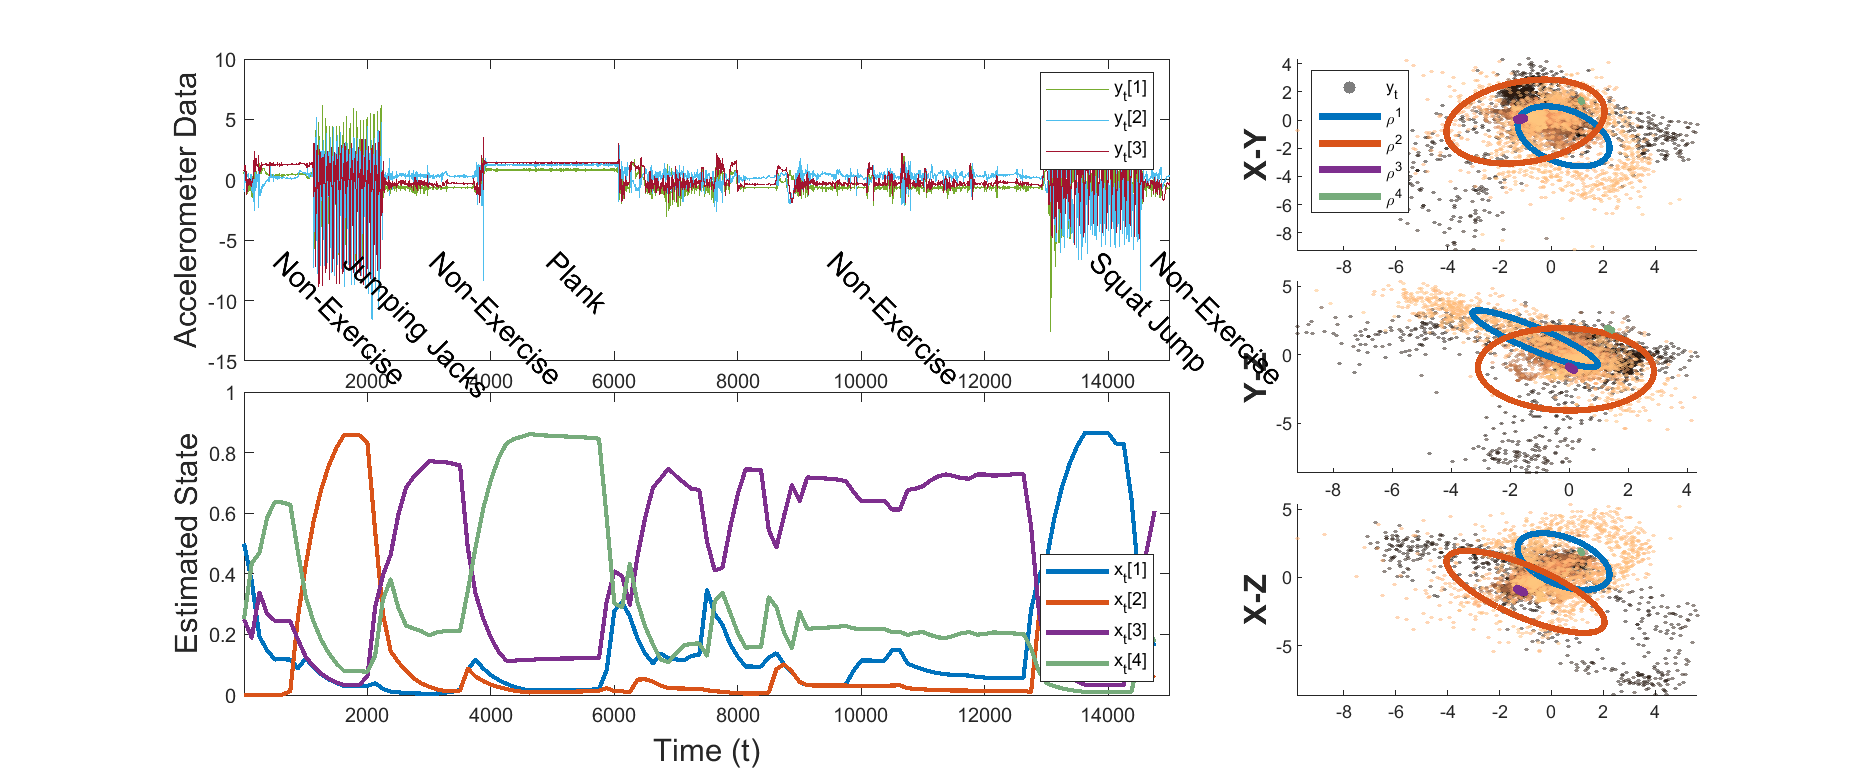

Supplement: Supplementary file 1 [file ebb71045453f38676c40deb9864f811d-Supplemental.zip › Supplement/MSR_Plots/subj001_1.png]

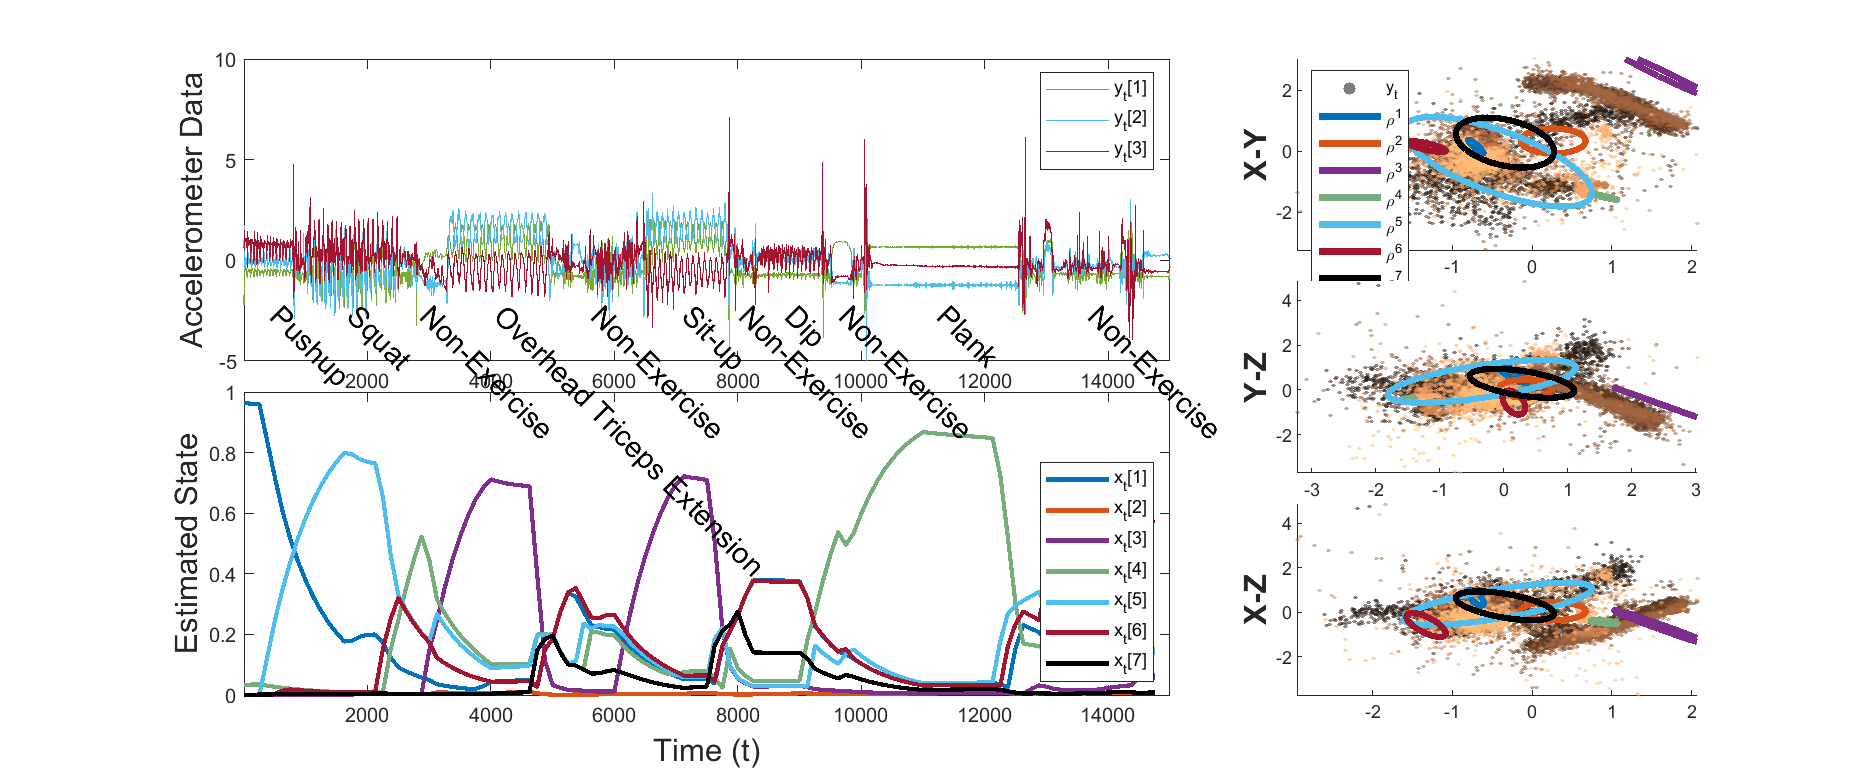

Supplement: Supplementary file 1 [file ebb71045453f38676c40deb9864f811d-Supplemental.zip › Supplement/MSR_Plots/subj001_2.png]

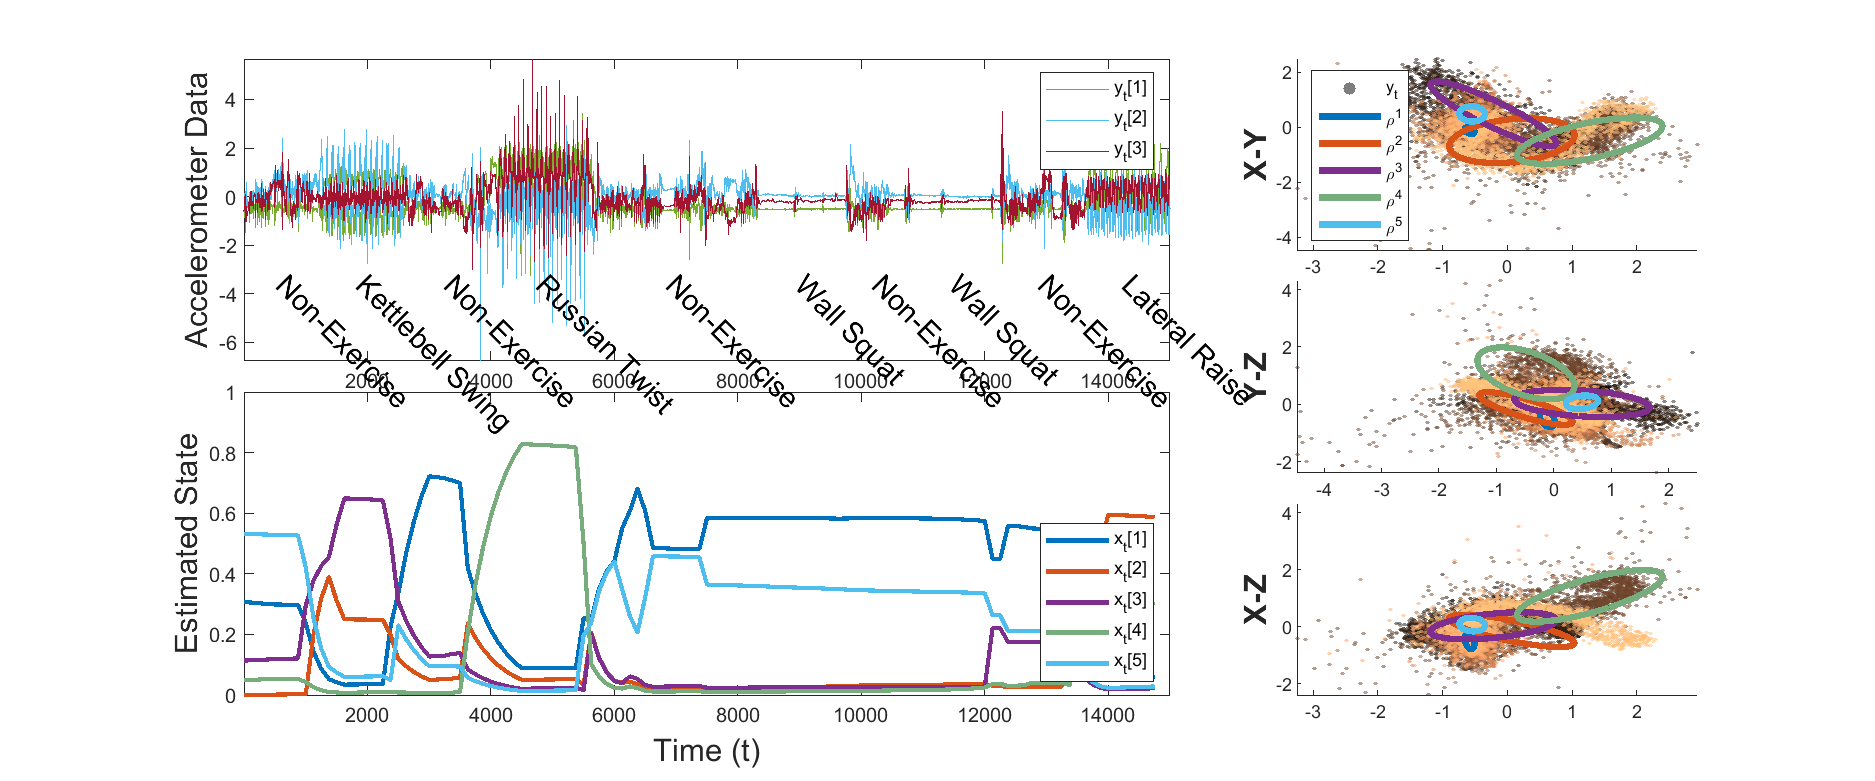

Supplement: Supplementary file 1 [file ebb71045453f38676c40deb9864f811d-Supplemental.zip › Supplement/MSR_Plots/subj001_3.png]

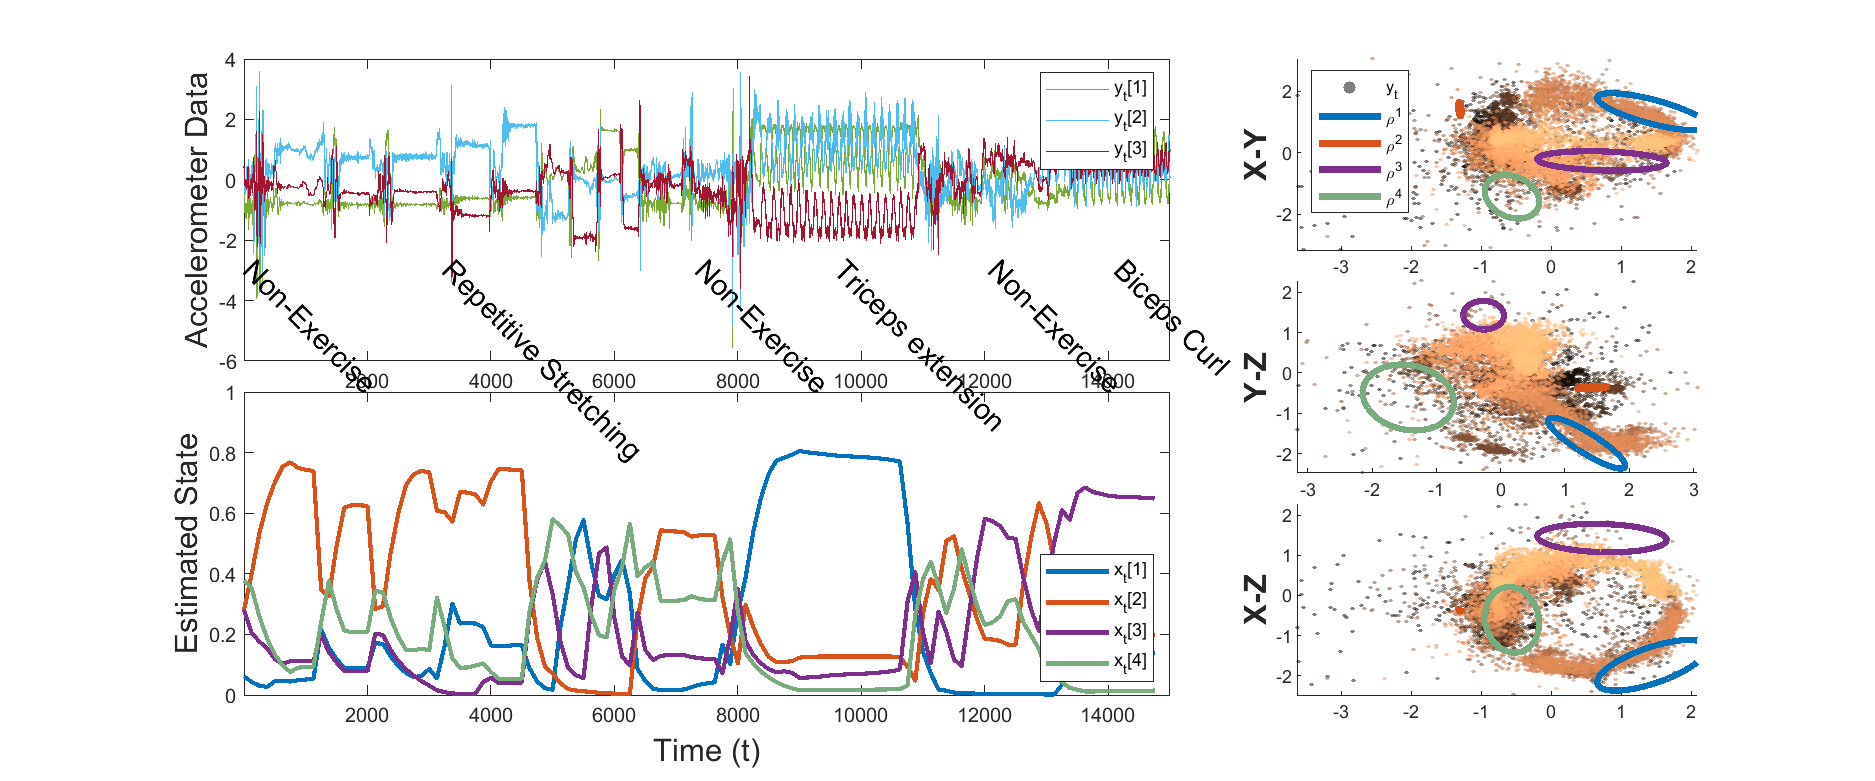

Supplement: Supplementary file 1 [file ebb71045453f38676c40deb9864f811d-Supplemental.zip › Supplement/MSR_Plots/subj001_4.png]

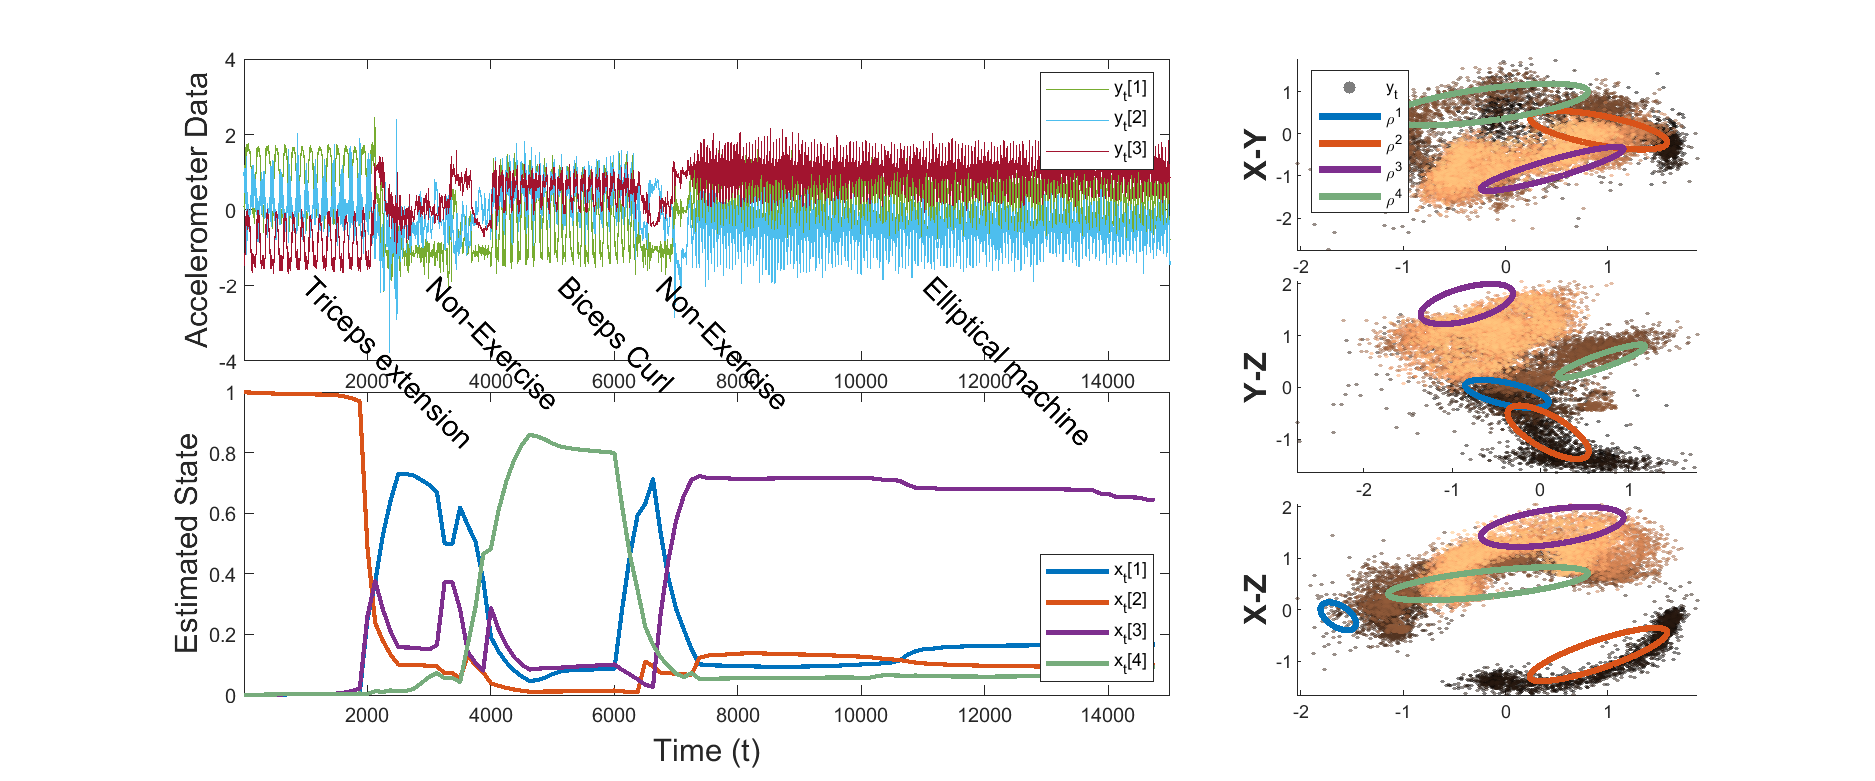

Supplement: Supplementary file 1 [file ebb71045453f38676c40deb9864f811d-Supplemental.zip › Supplement/MSR_Plots/subj001_5.png]

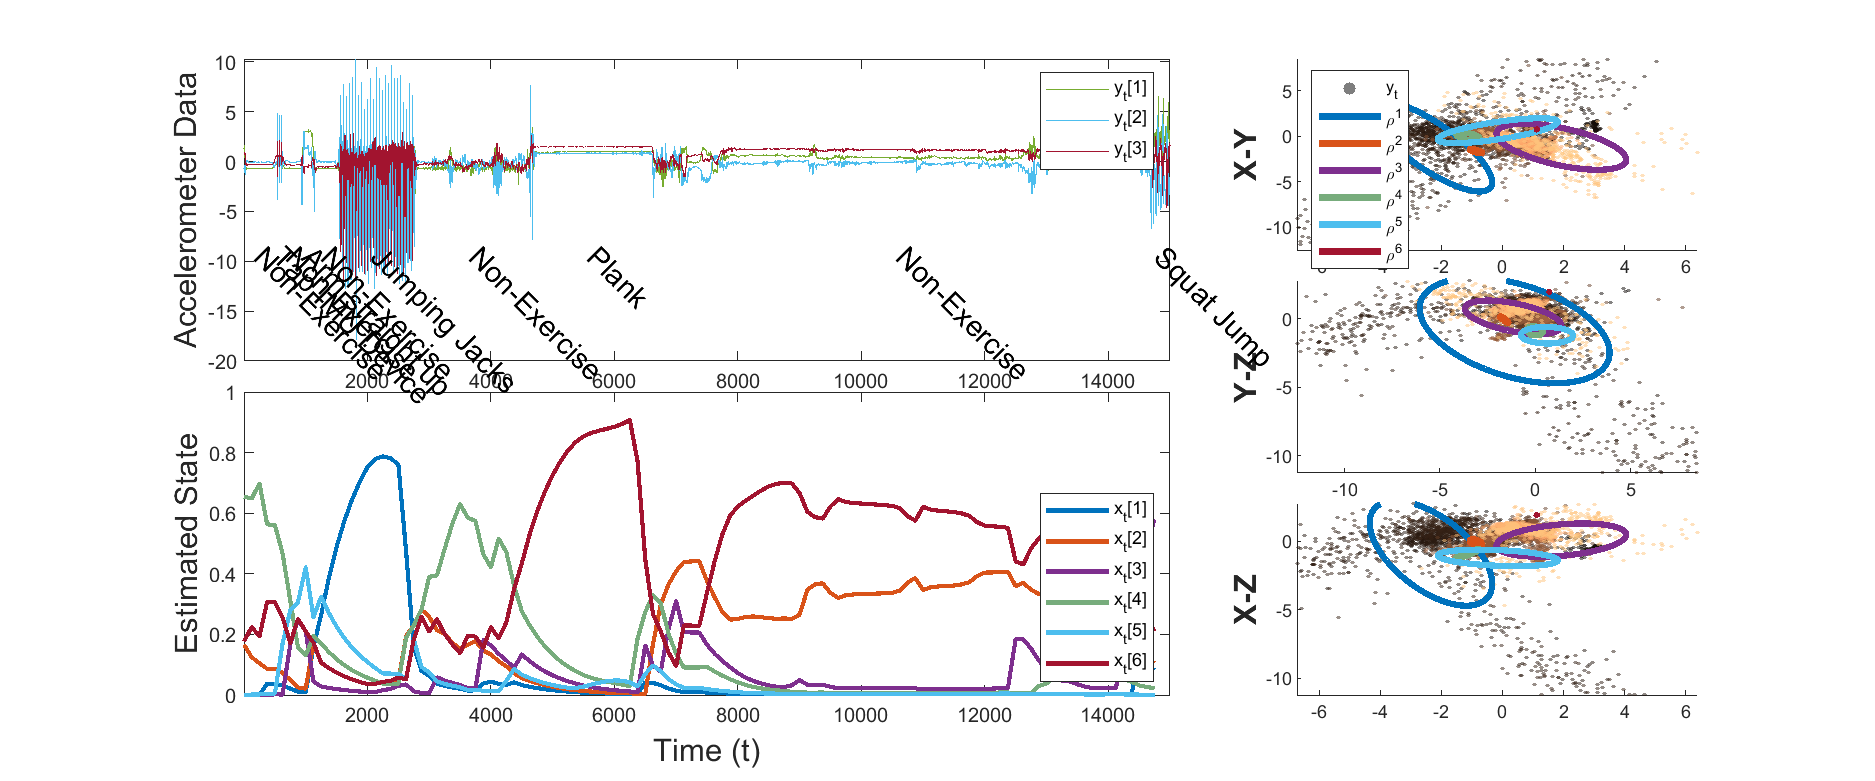

Supplement: Supplementary file 1 [file ebb71045453f38676c40deb9864f811d-Supplemental.zip › Supplement/MSR_Plots/subj002_1.png]

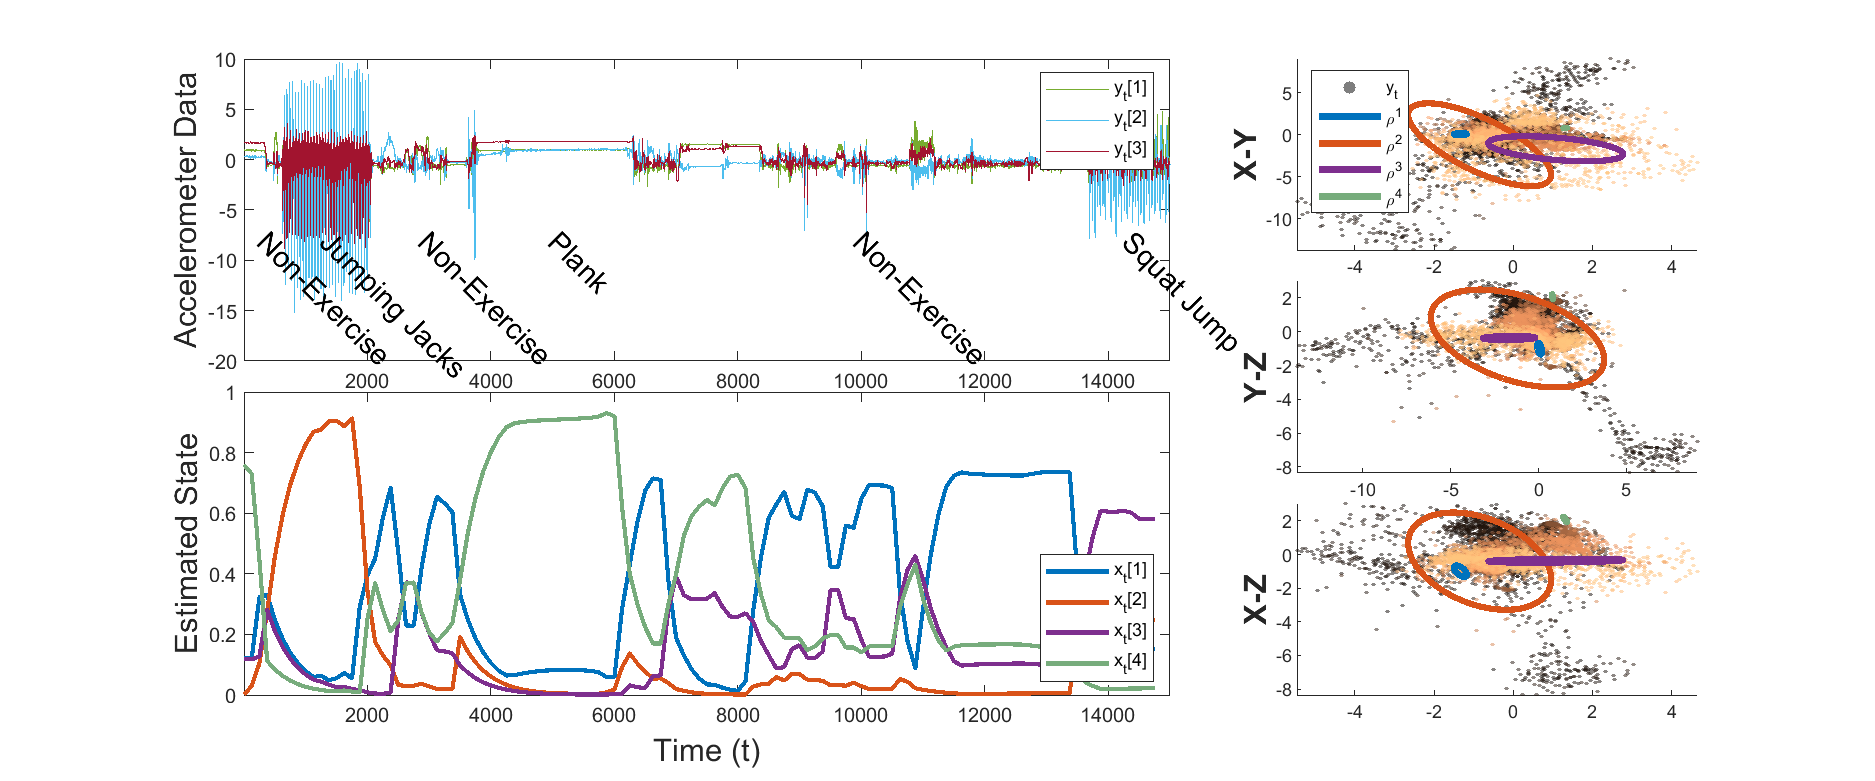

Supplement: Supplementary file 1 [file ebb71045453f38676c40deb9864f811d-Supplemental.zip › Supplement/MSR_Plots/subj003_1.png]

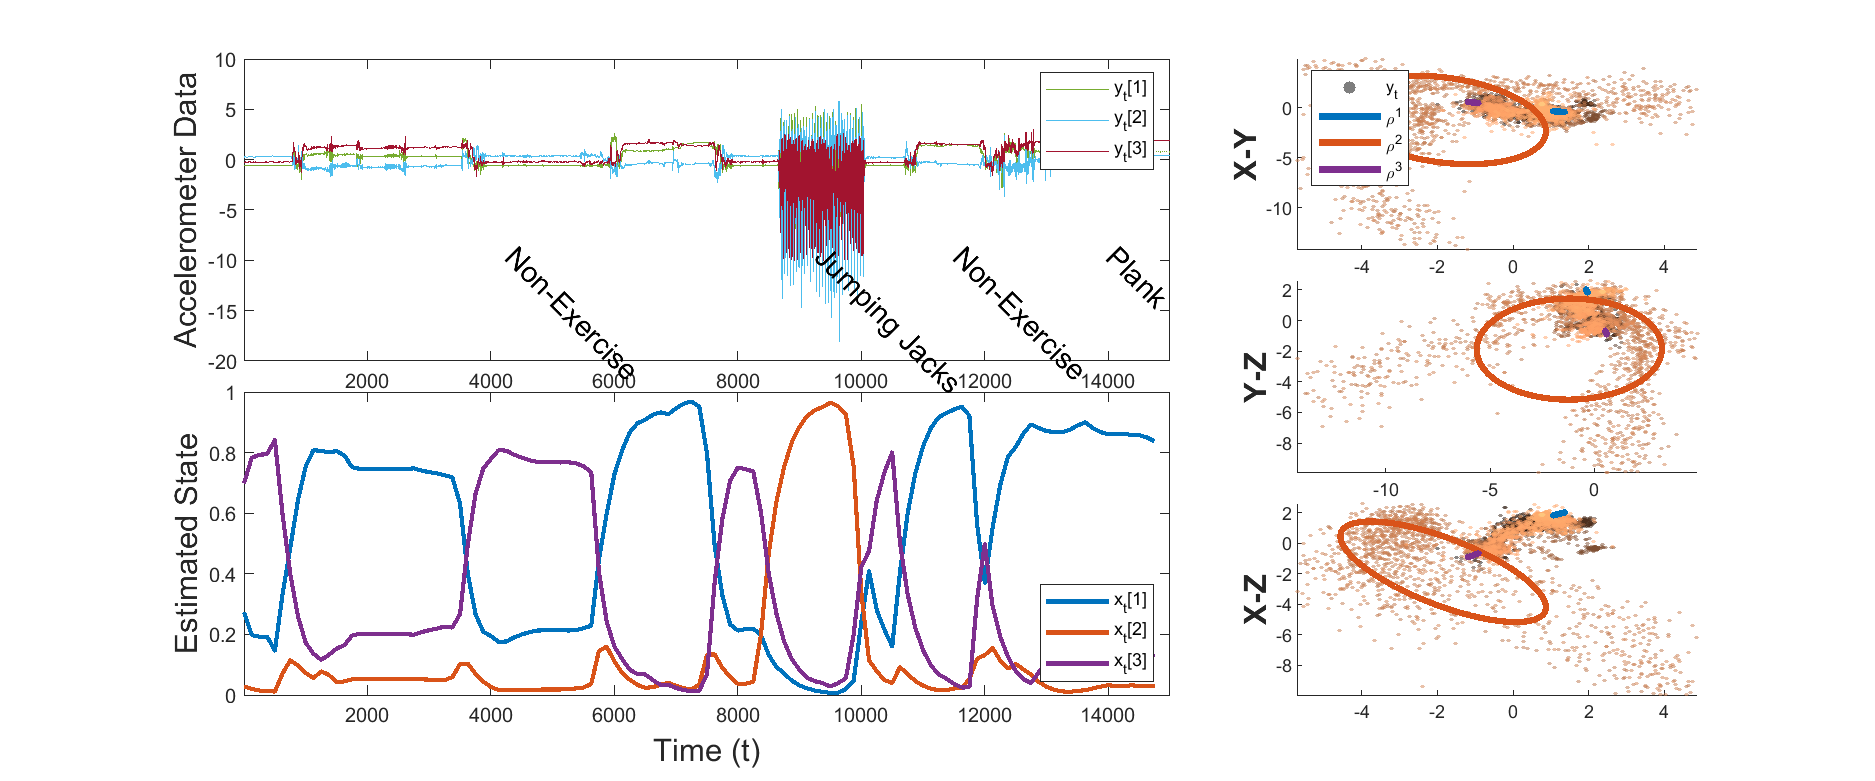

Supplement: Supplementary file 1 [file ebb71045453f38676c40deb9864f811d-Supplemental.zip › Supplement/MSR_Plots/subj004_1.png]

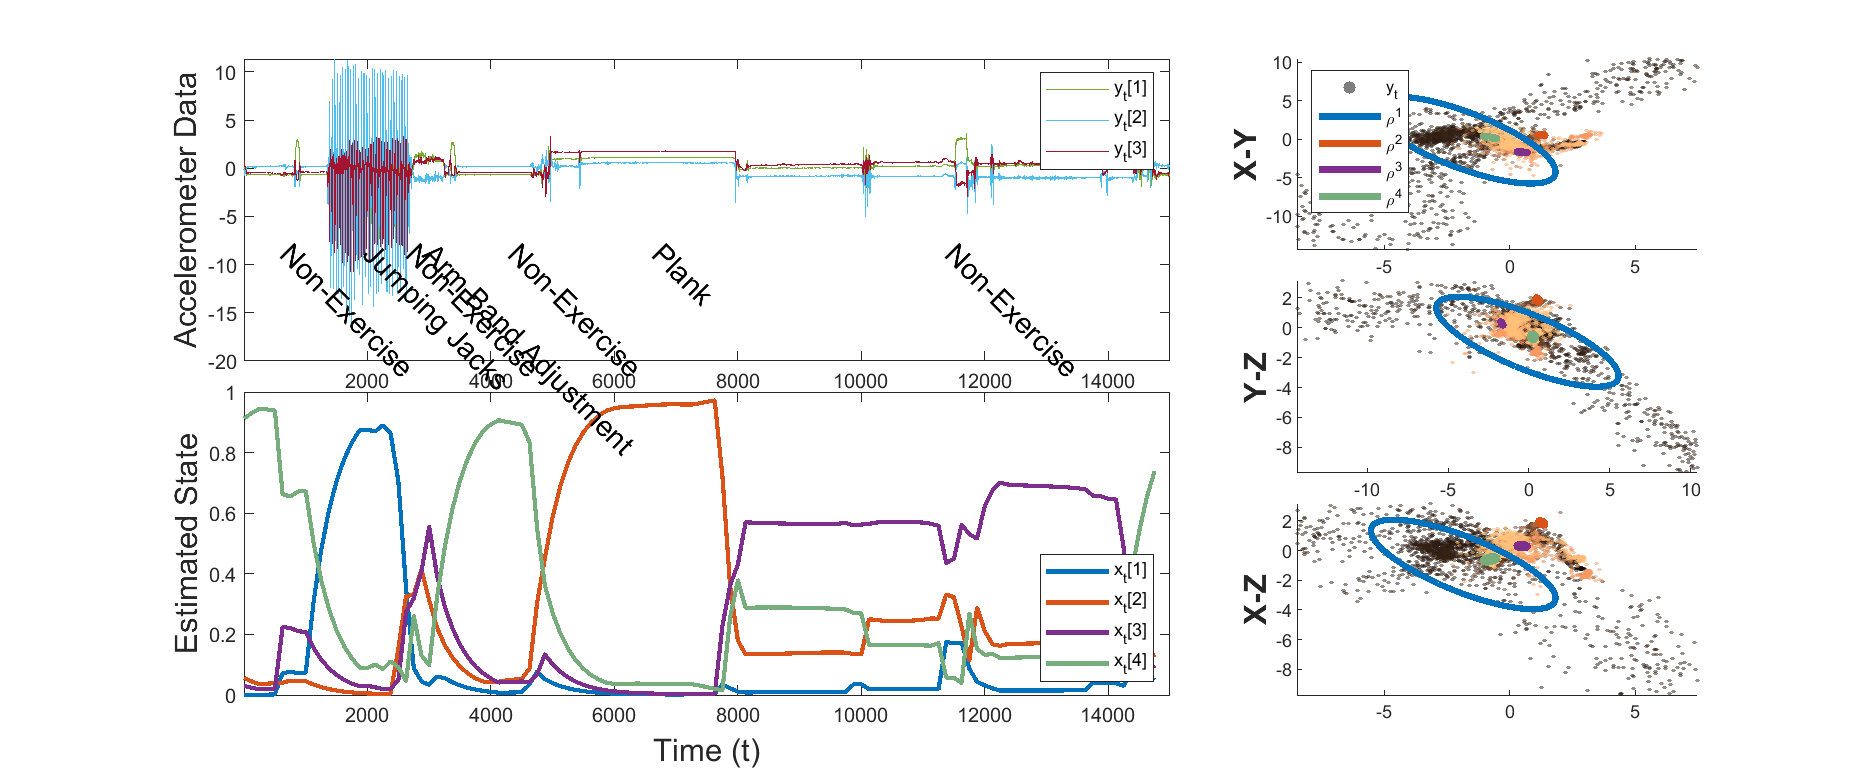

Supplement: Supplementary file 1 [file ebb71045453f38676c40deb9864f811d-Supplemental.zip › Supplement/MSR_Plots/subj005_1.png]

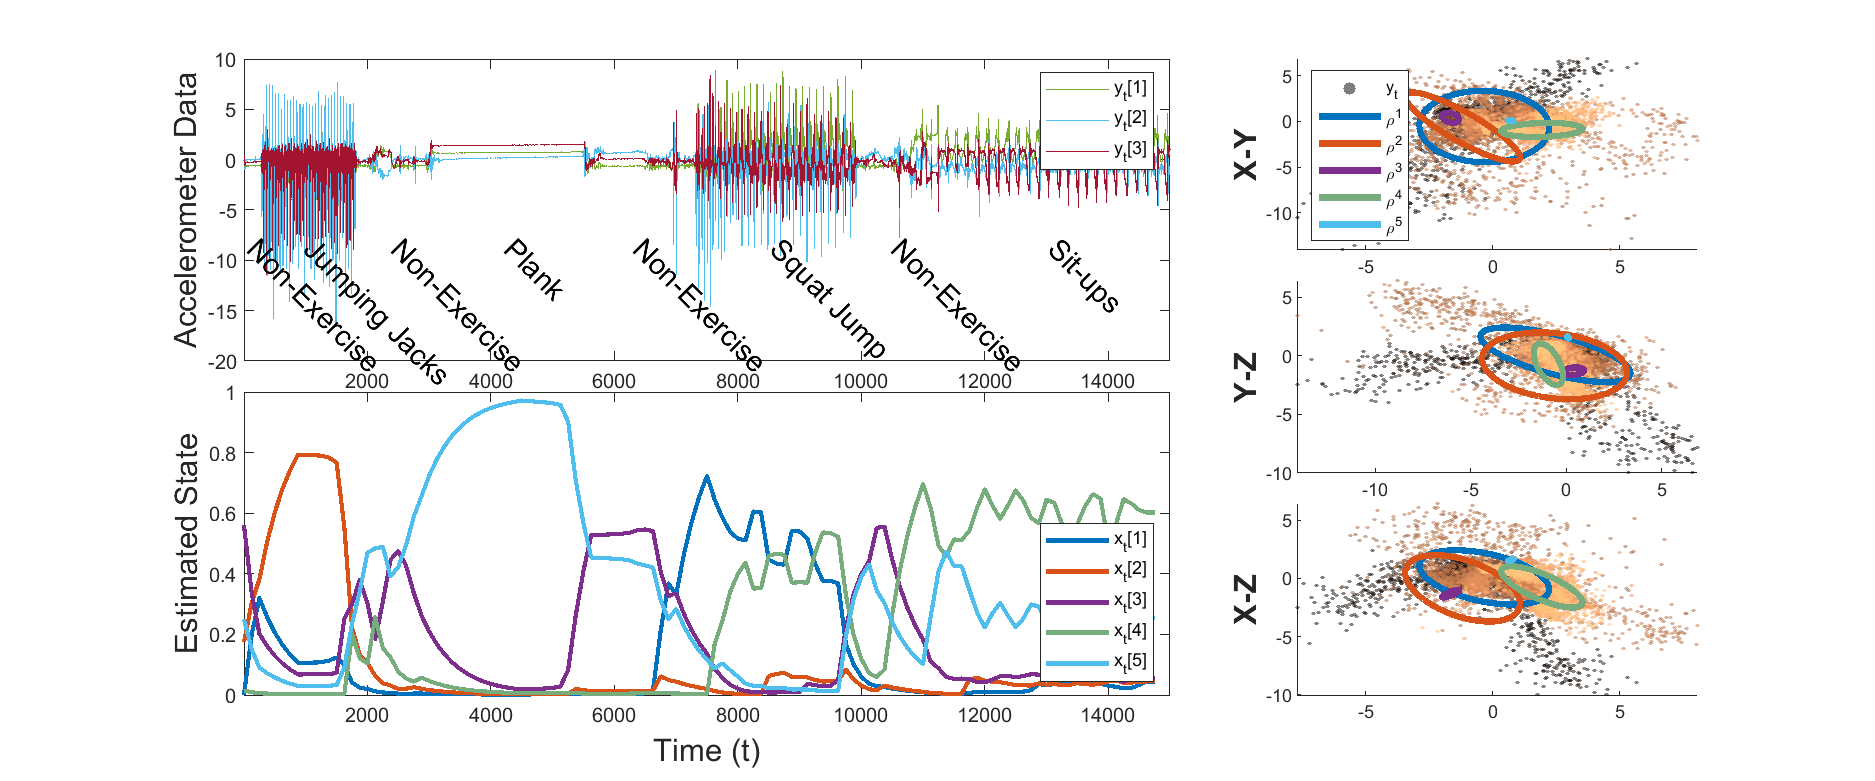

Supplement: Supplementary file 1 [file ebb71045453f38676c40deb9864f811d-Supplemental.zip › Supplement/MSR_Plots/subj006_1.png]

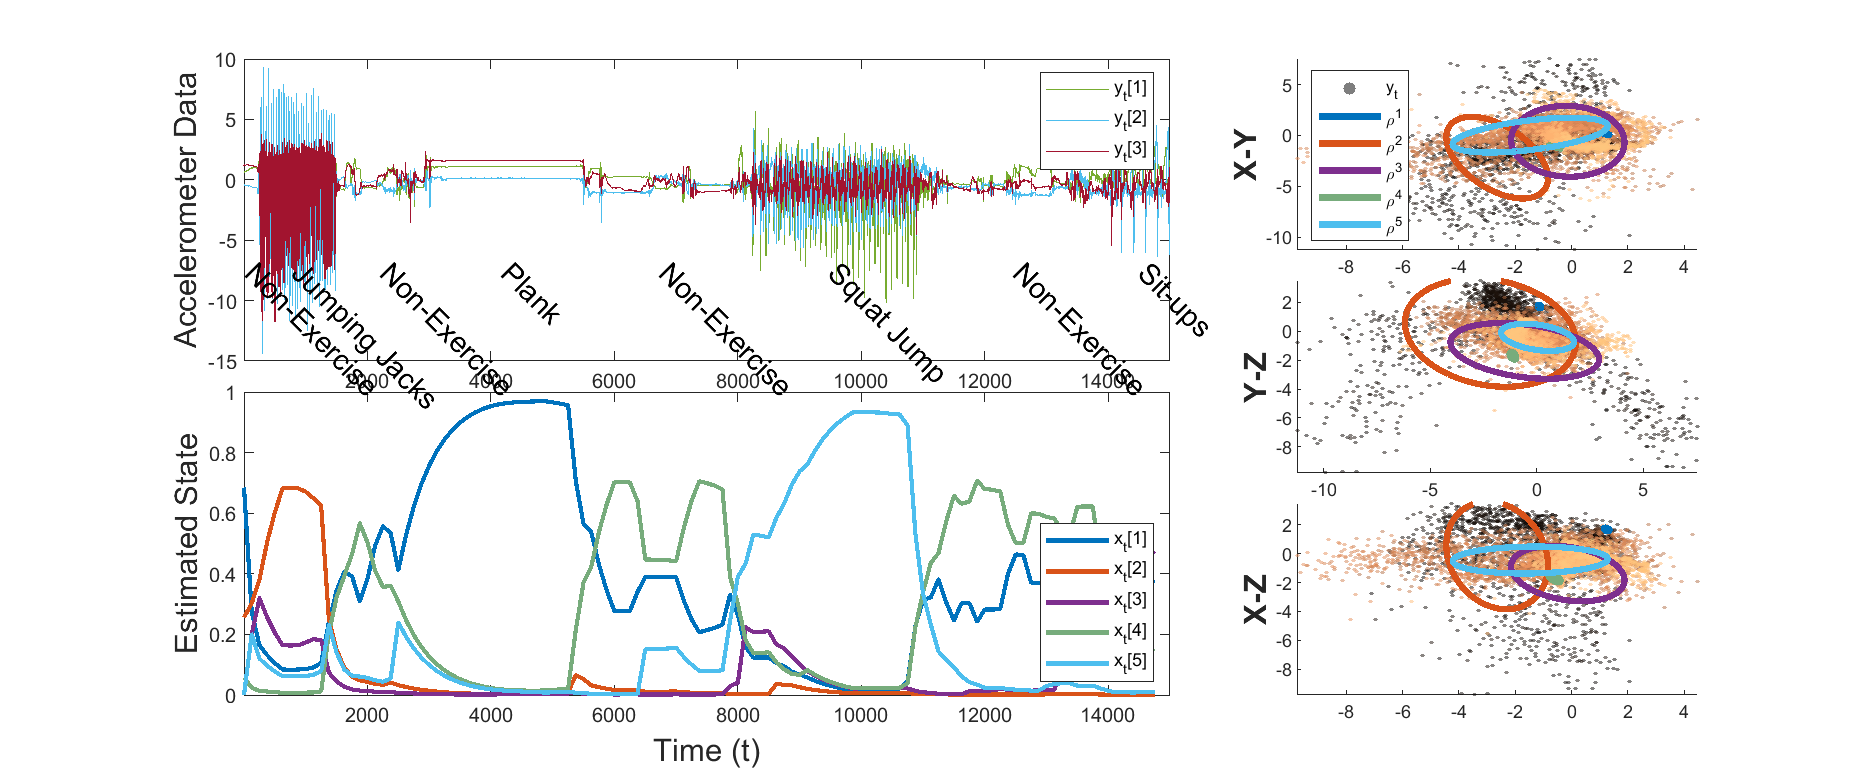

Supplement: Supplementary file 1 [file ebb71045453f38676c40deb9864f811d-Supplemental.zip › Supplement/MSR_Plots/subj007_1.png]

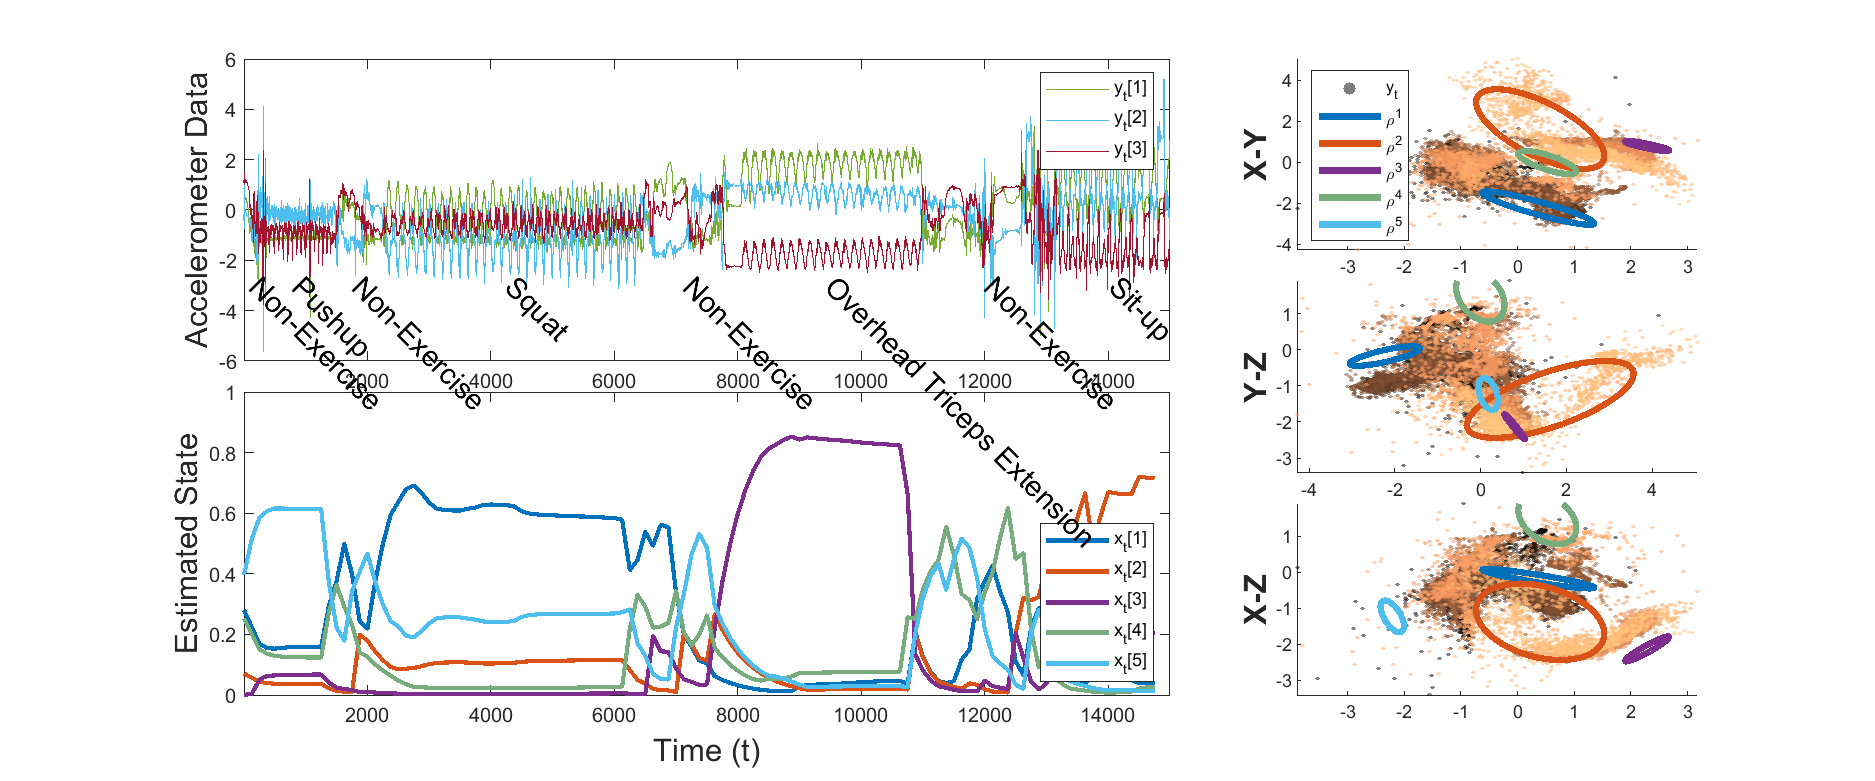

Supplement: Supplementary file 1 [file ebb71045453f38676c40deb9864f811d-Supplemental.zip › Supplement/MSR_Plots/subj007_2.png]

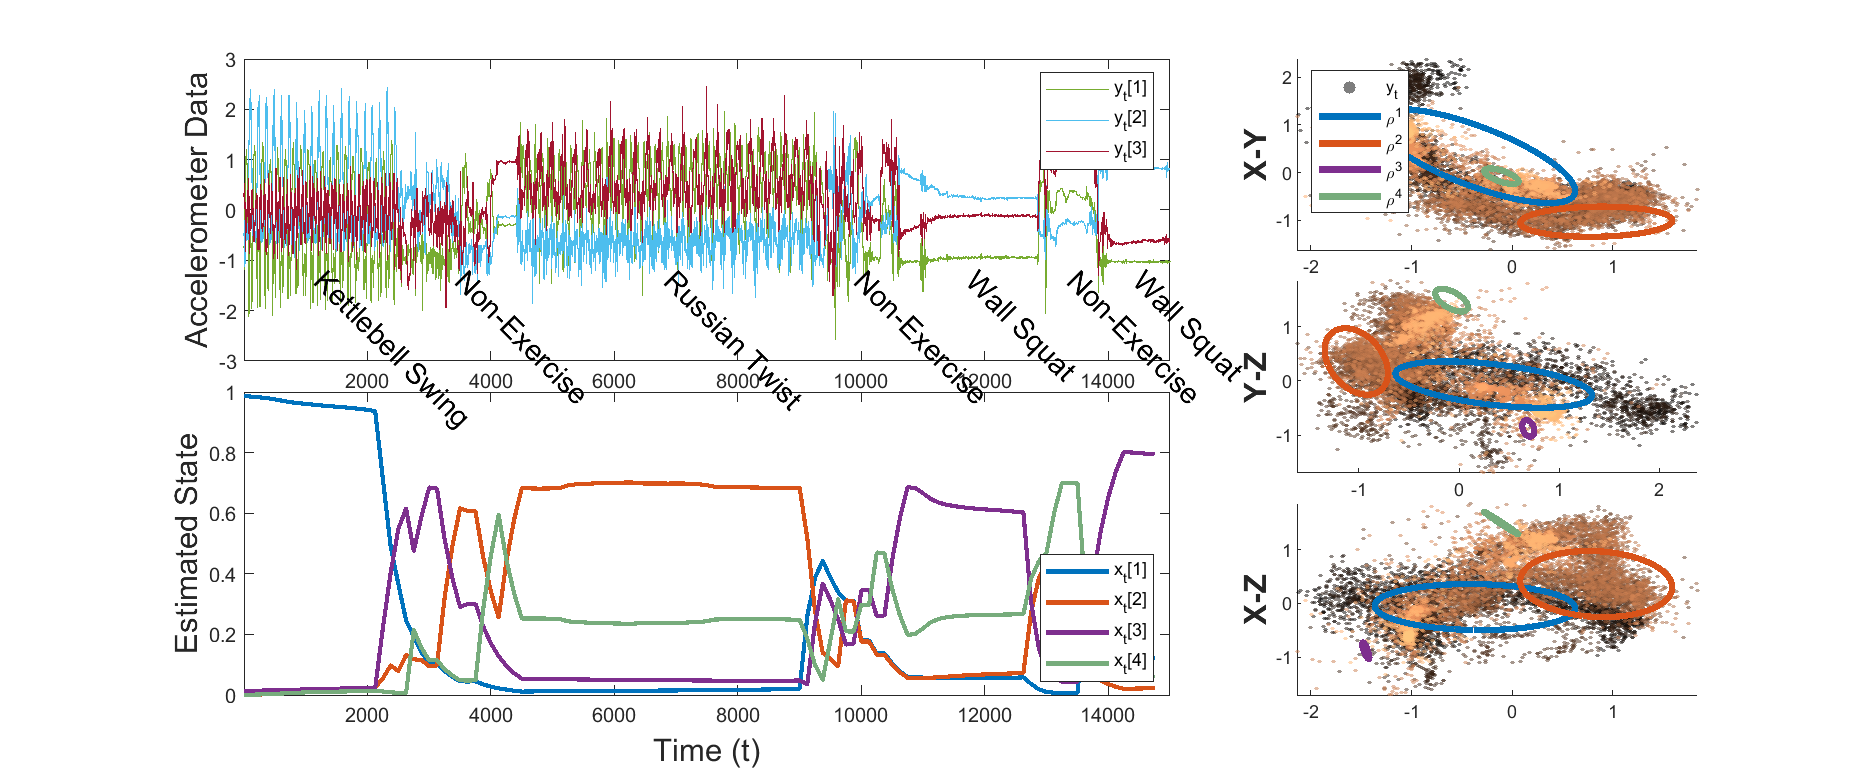

Supplement: Supplementary file 1 [file ebb71045453f38676c40deb9864f811d-Supplemental.zip › Supplement/MSR_Plots/subj007_3.png]

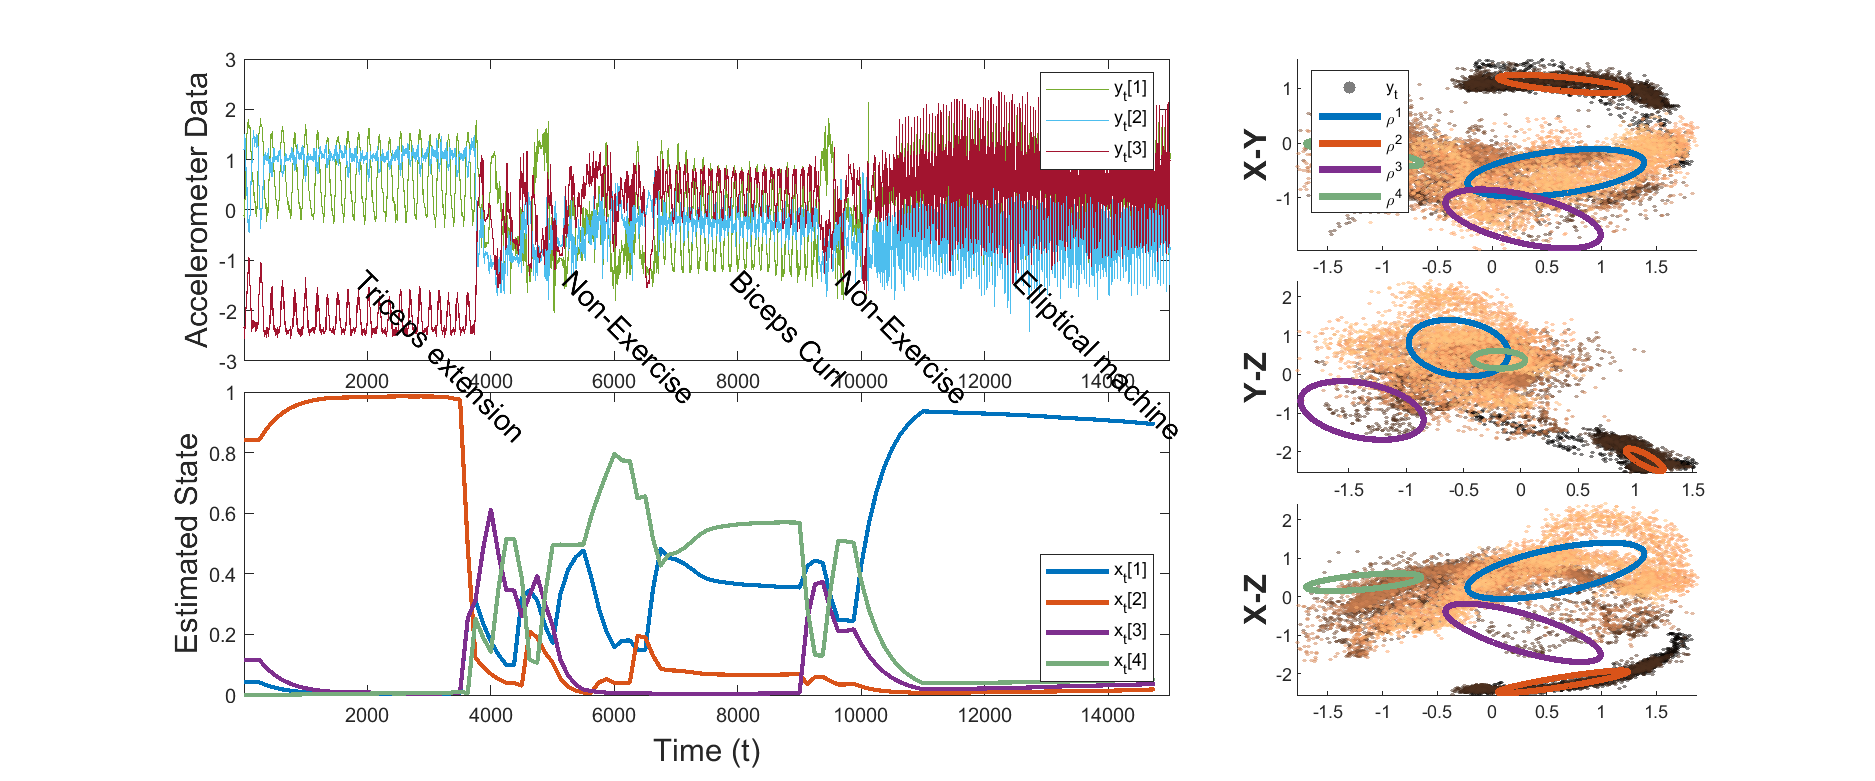

Supplement: Supplementary file 1 [file ebb71045453f38676c40deb9864f811d-Supplemental.zip › Supplement/MSR_Plots/subj007_4.png]

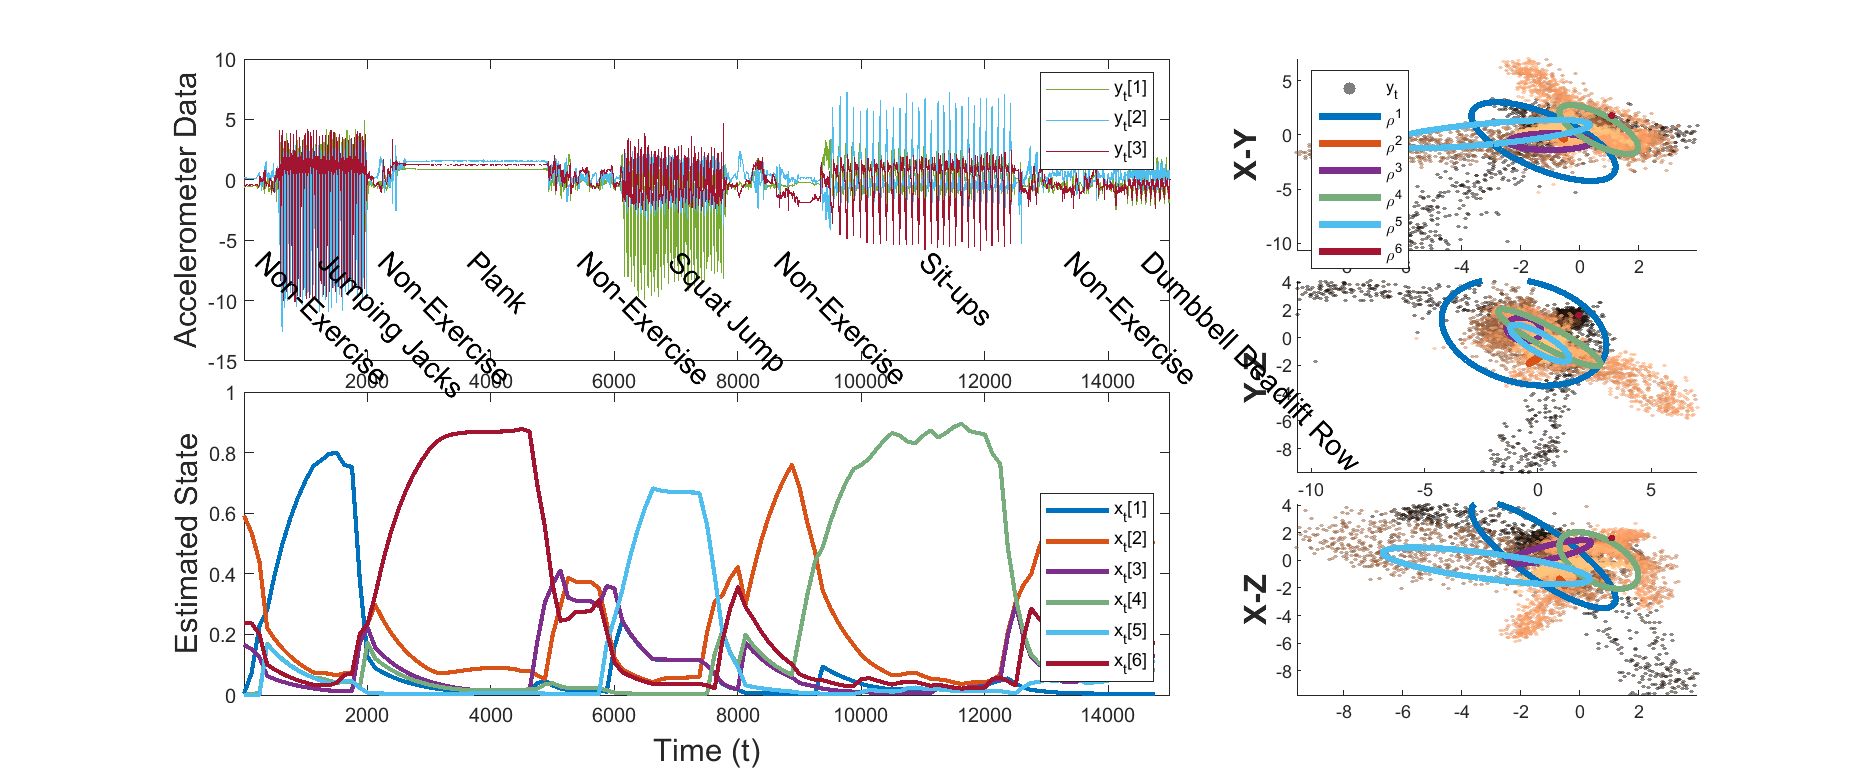

Supplement: Supplementary file 1 [file ebb71045453f38676c40deb9864f811d-Supplemental.zip › Supplement/MSR_Plots/subj008_1.png]

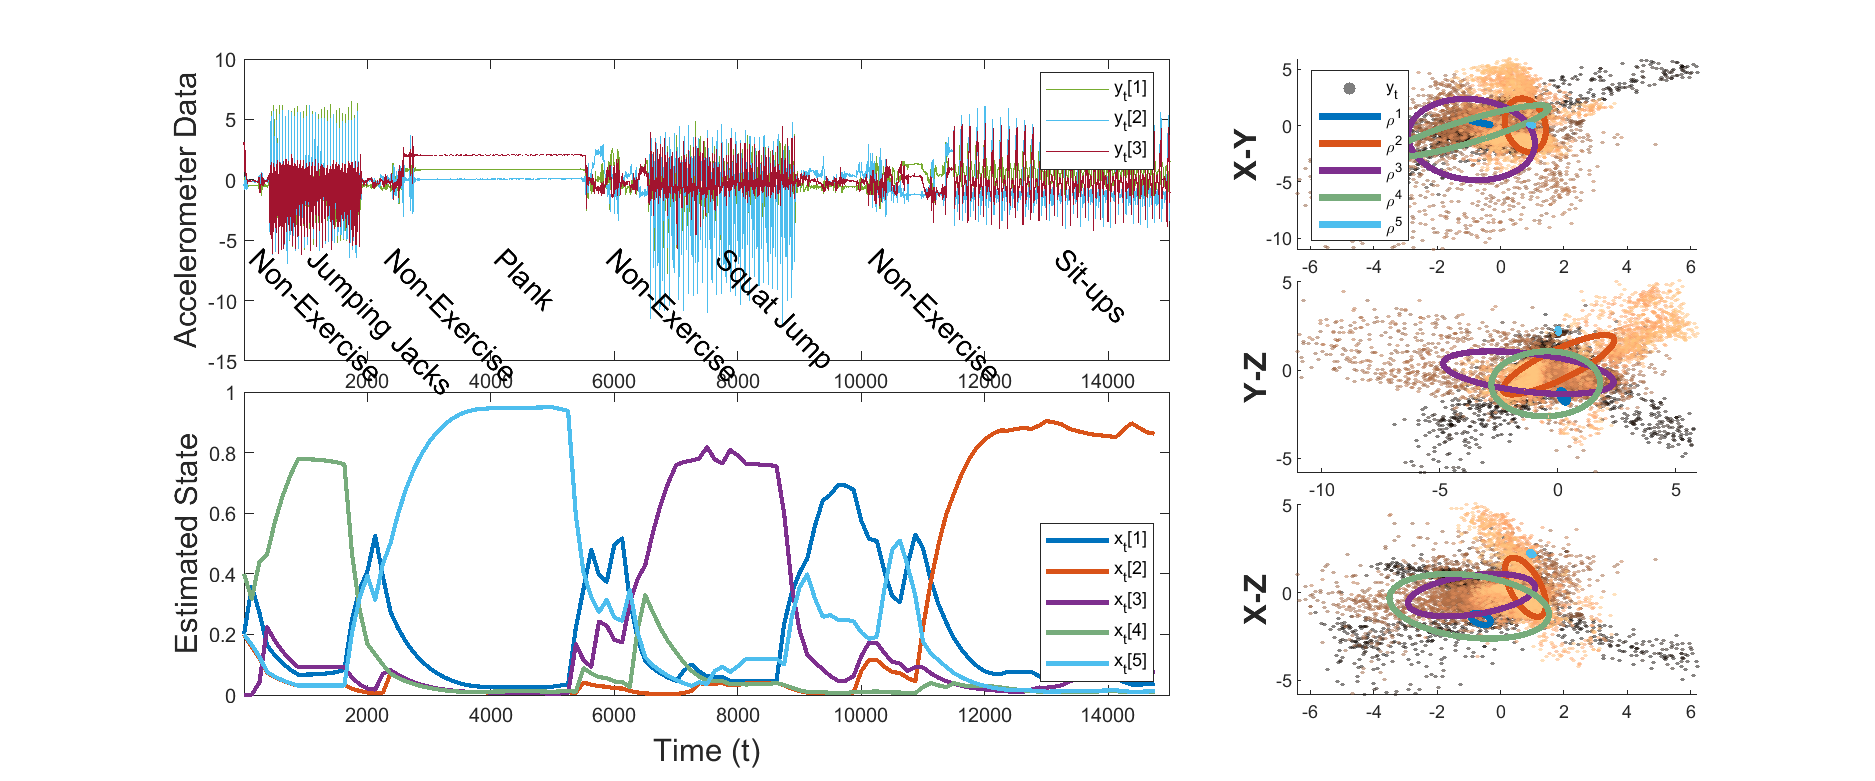

Supplement: Supplementary file 1 [file ebb71045453f38676c40deb9864f811d-Supplemental.zip › Supplement/MSR_Plots/subj009_1.png]

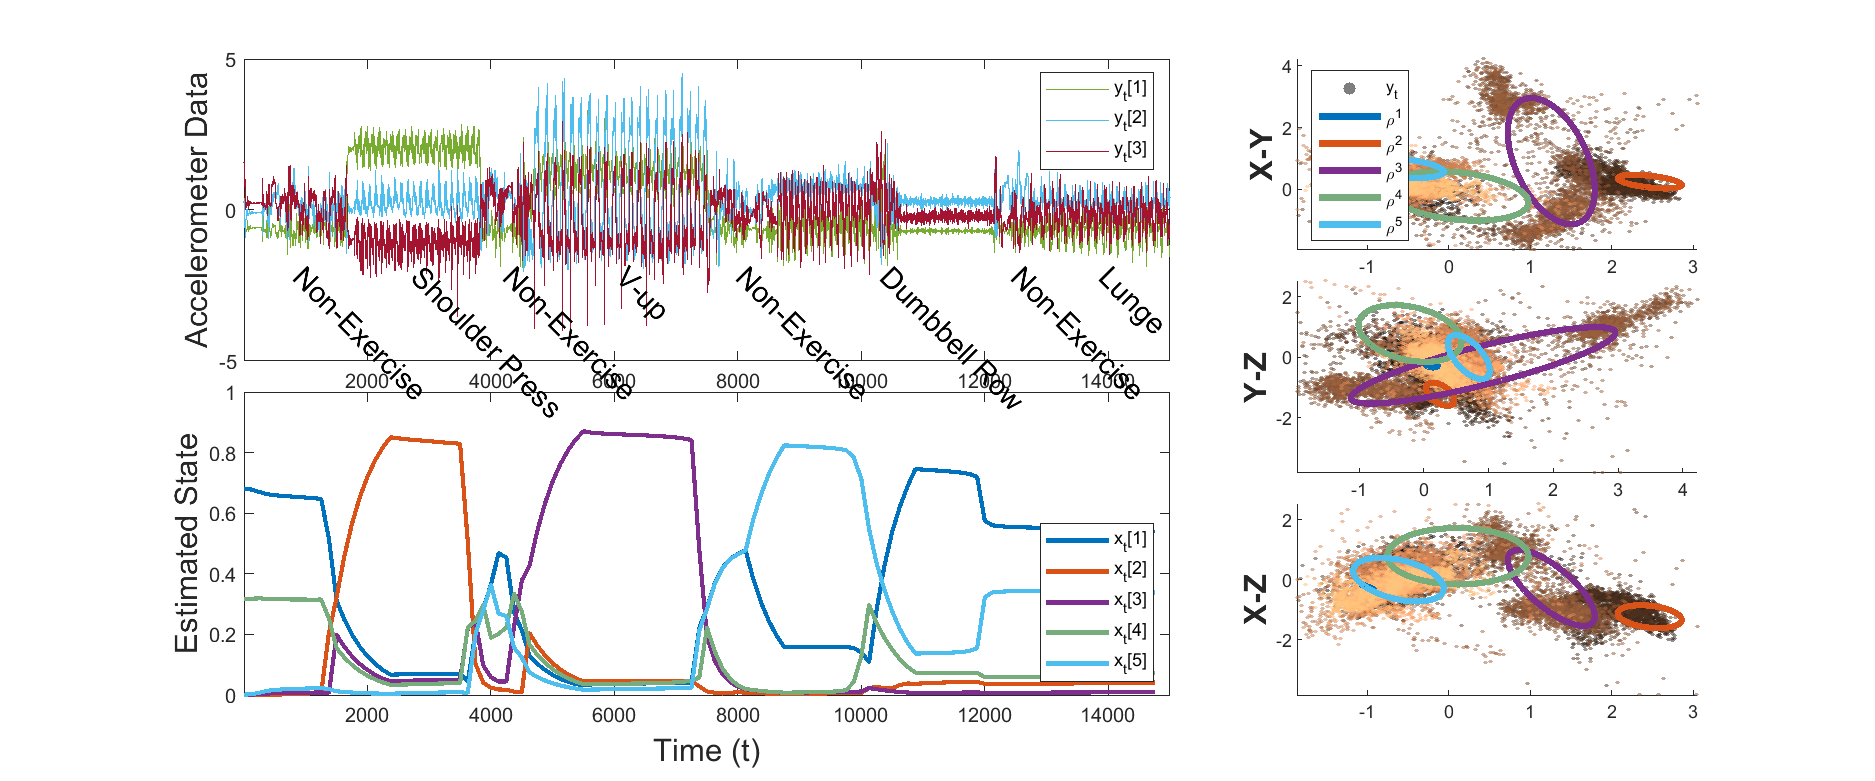

Supplement: Supplementary file 1 [file ebb71045453f38676c40deb9864f811d-Supplemental.zip › Supplement/MSR_Plots/subj009_2.png]

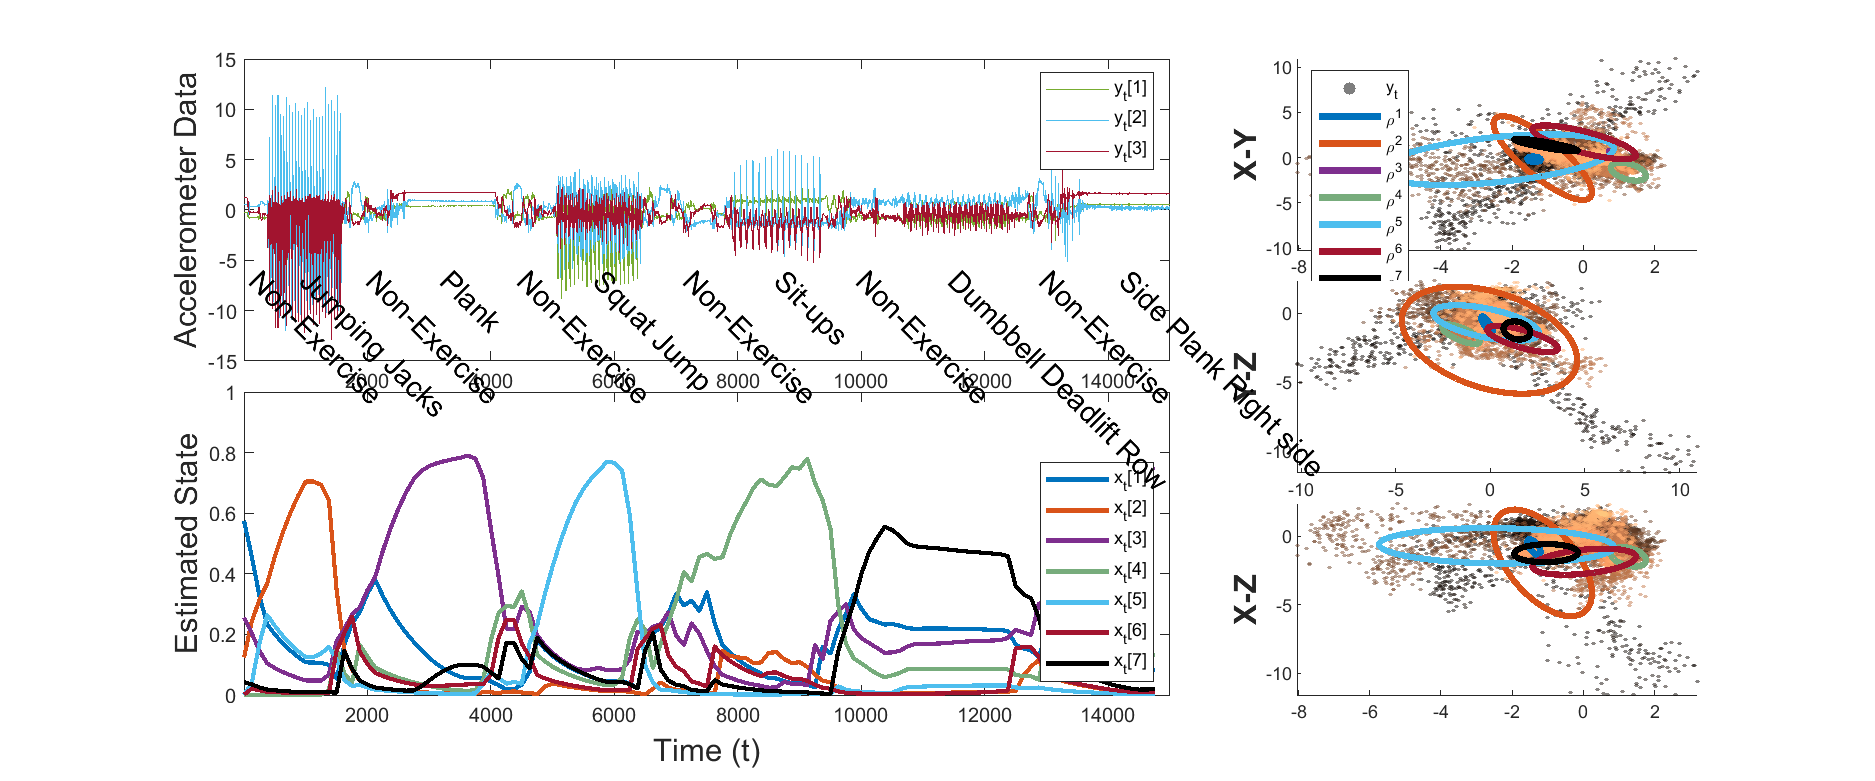

Supplement: Supplementary file 1 [file ebb71045453f38676c40deb9864f811d-Supplemental.zip › Supplement/MSR_Plots/subj010_1.png]

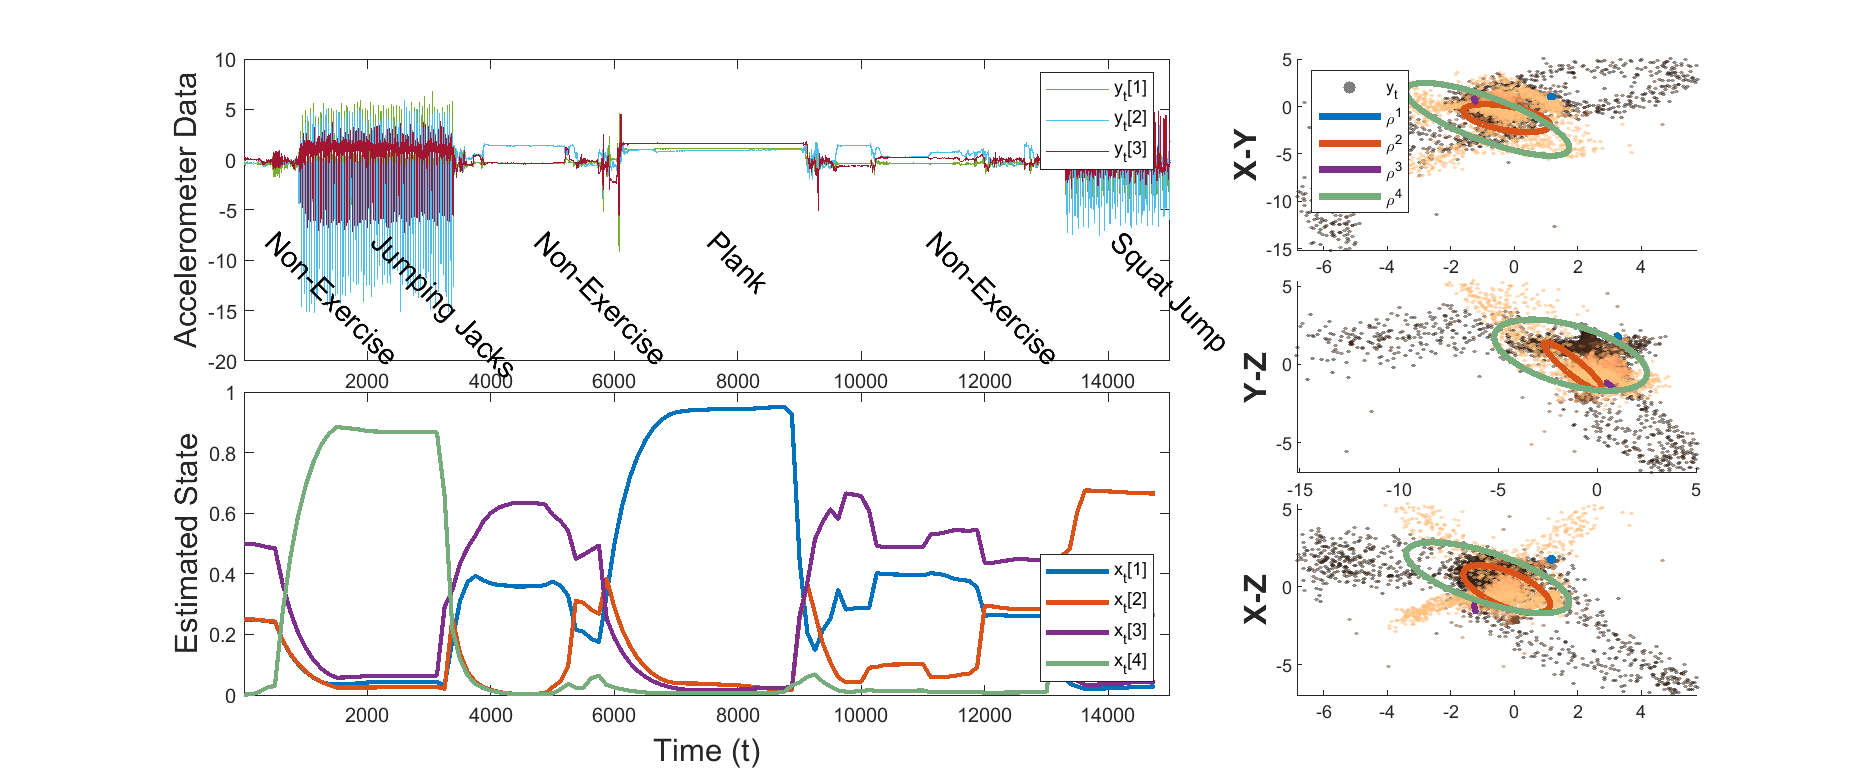

Supplement: Supplementary file 1 [file ebb71045453f38676c40deb9864f811d-Supplemental.zip › Supplement/MSR_Plots/subj011_1.png]

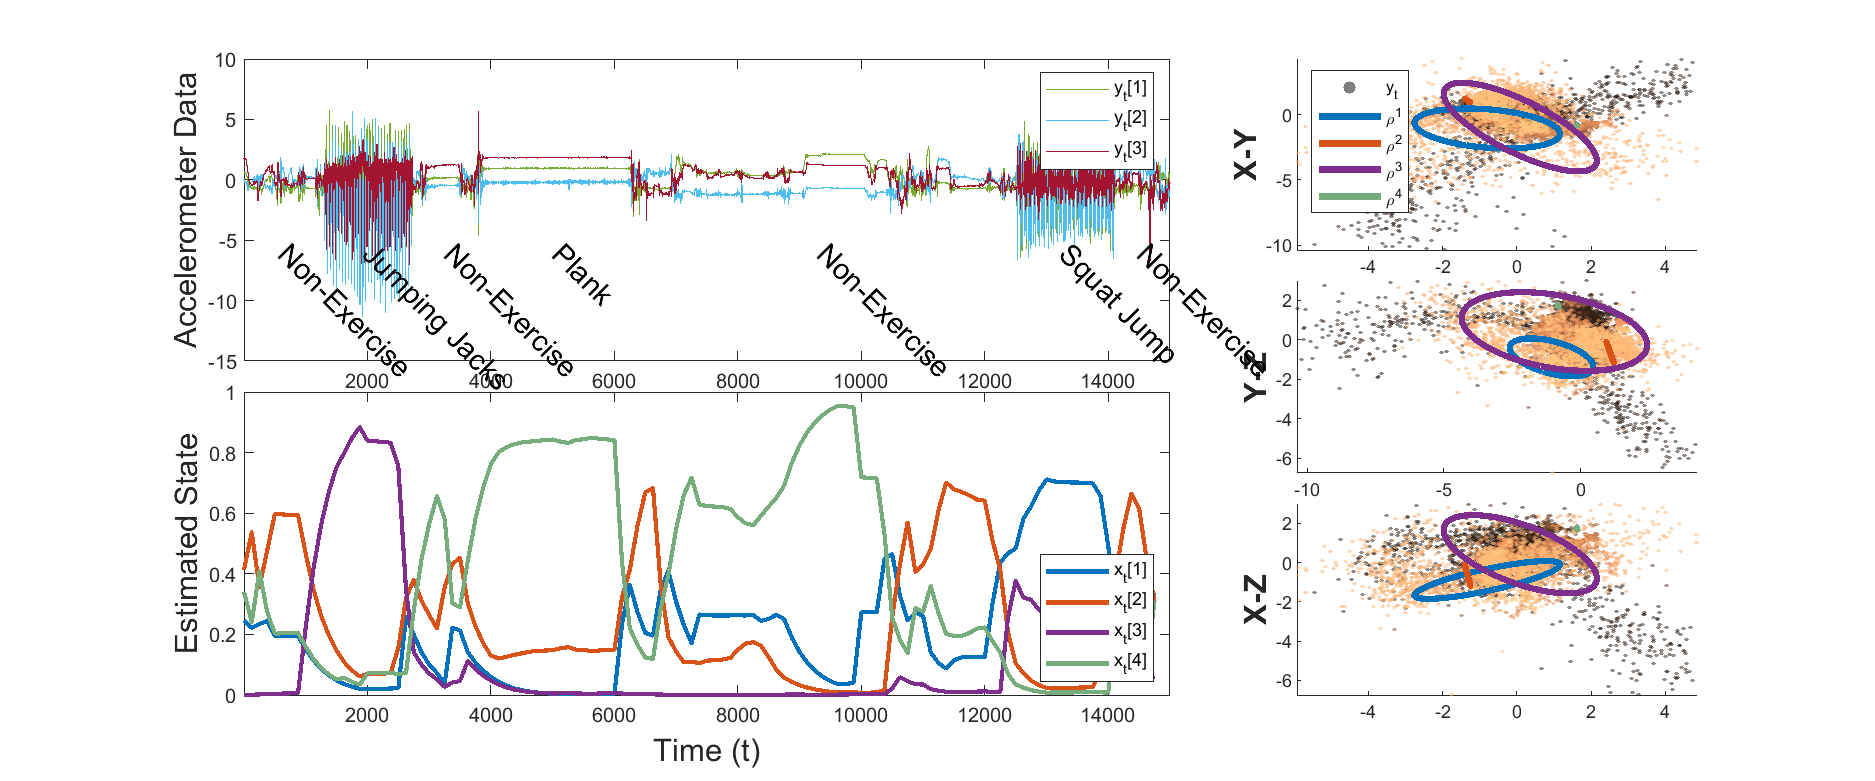

Supplement: Supplementary file 1 [file ebb71045453f38676c40deb9864f811d-Supplemental.zip › Supplement/MSR_Plots/subj012_1.png]

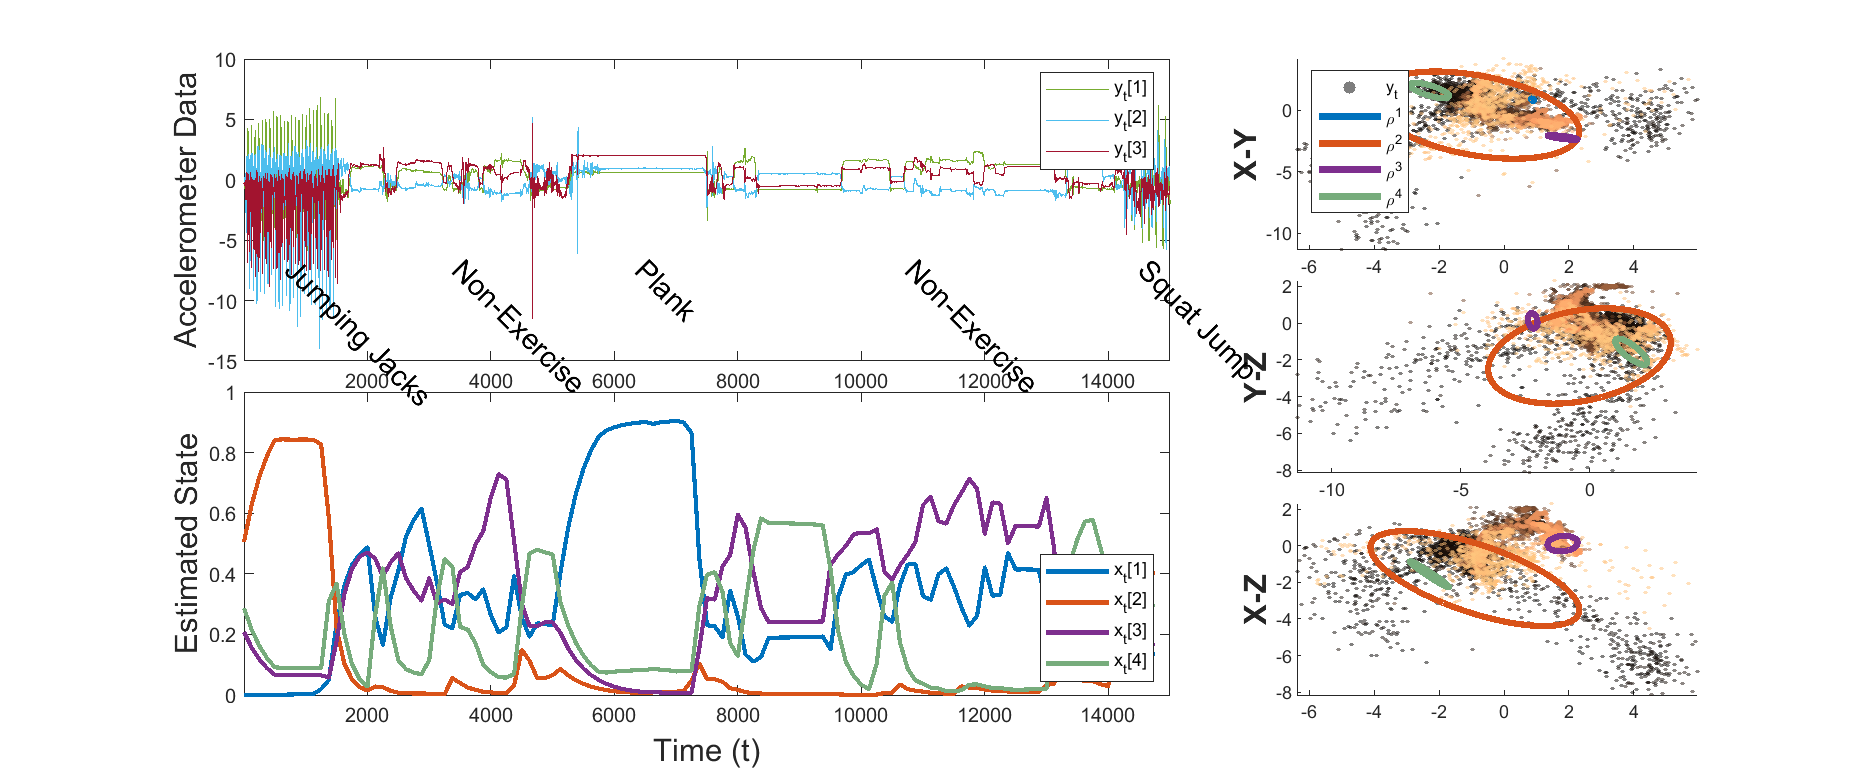

Supplement: Supplementary file 1 [file ebb71045453f38676c40deb9864f811d-Supplemental.zip › Supplement/MSR_Plots/subj013_1.png]

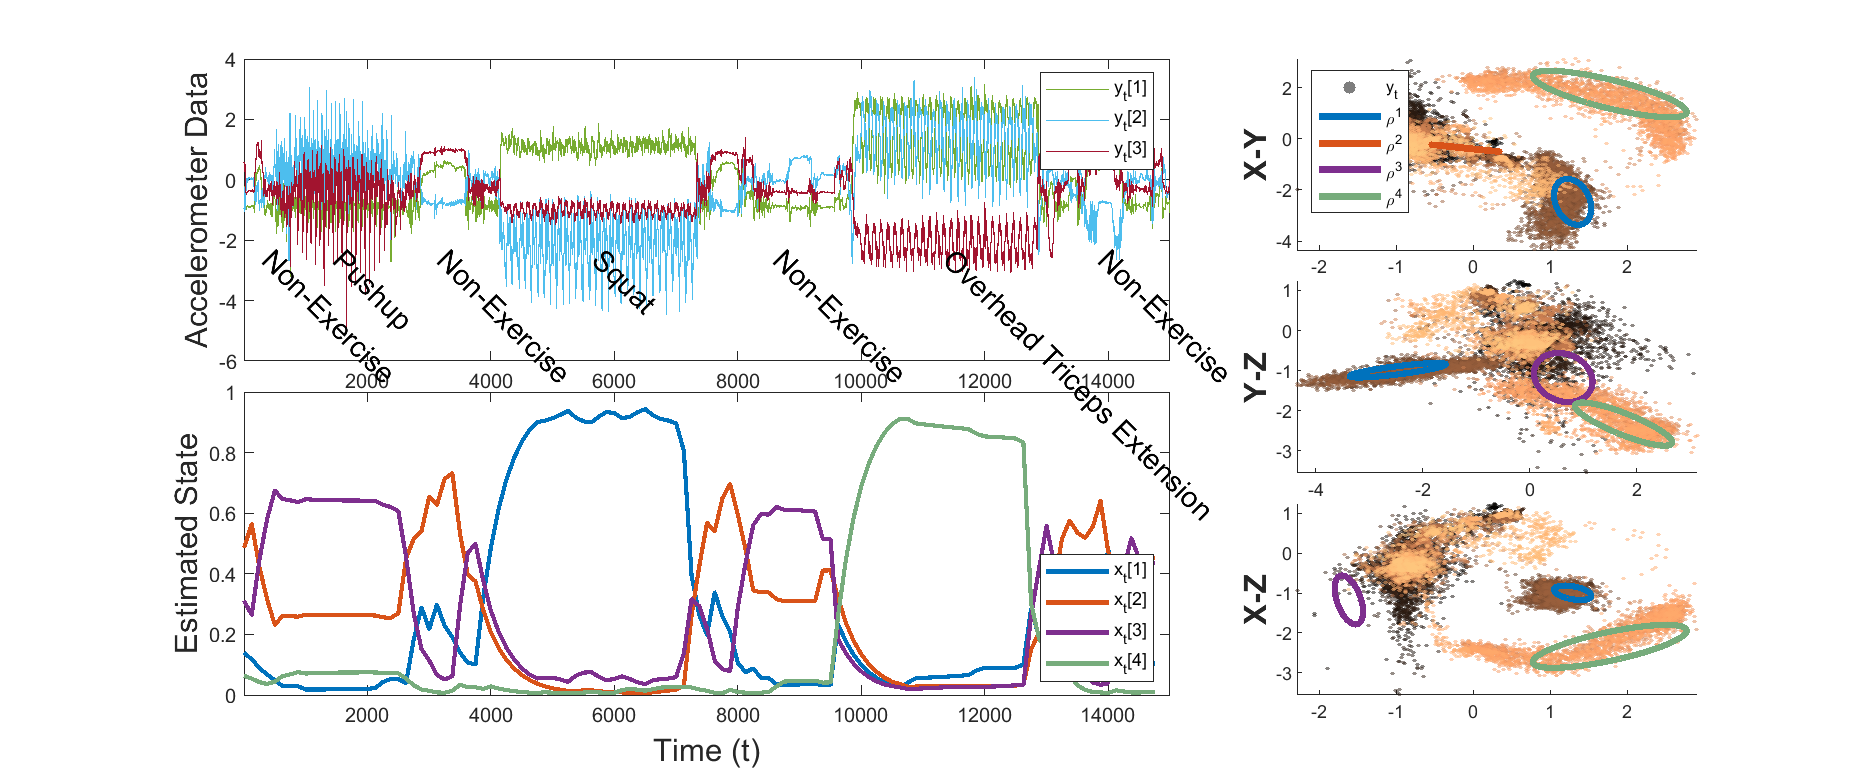

Supplement: Supplementary file 1 [file ebb71045453f38676c40deb9864f811d-Supplemental.zip › Supplement/MSR_Plots/subj014_1.png]

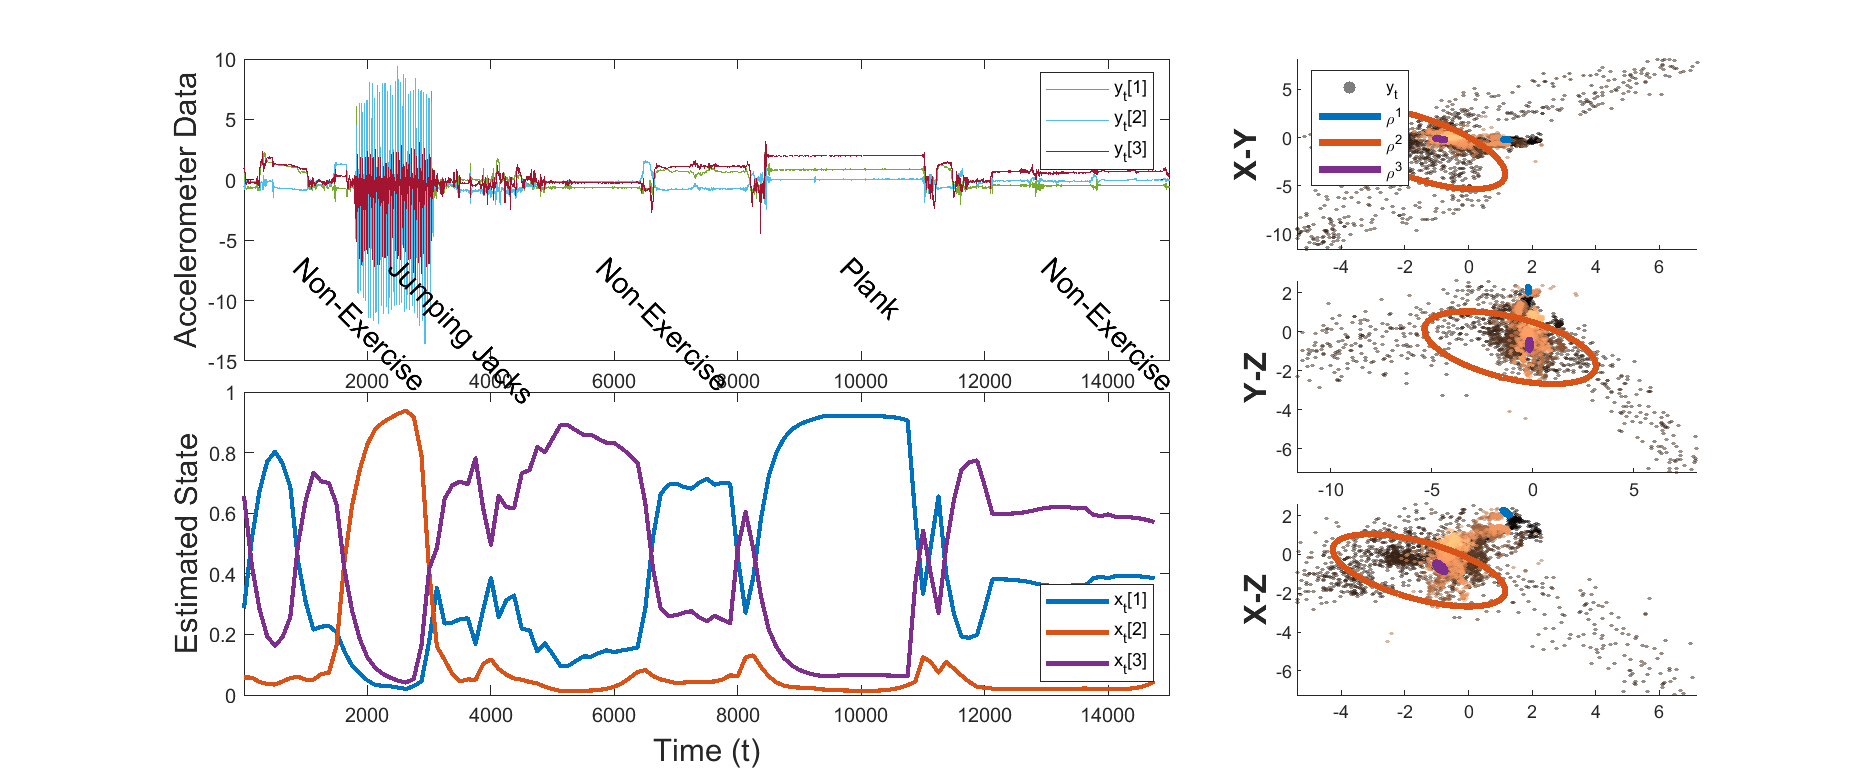

Supplement: Supplementary file 1 [file ebb71045453f38676c40deb9864f811d-Supplemental.zip › Supplement/MSR_Plots/subj014_2.png]

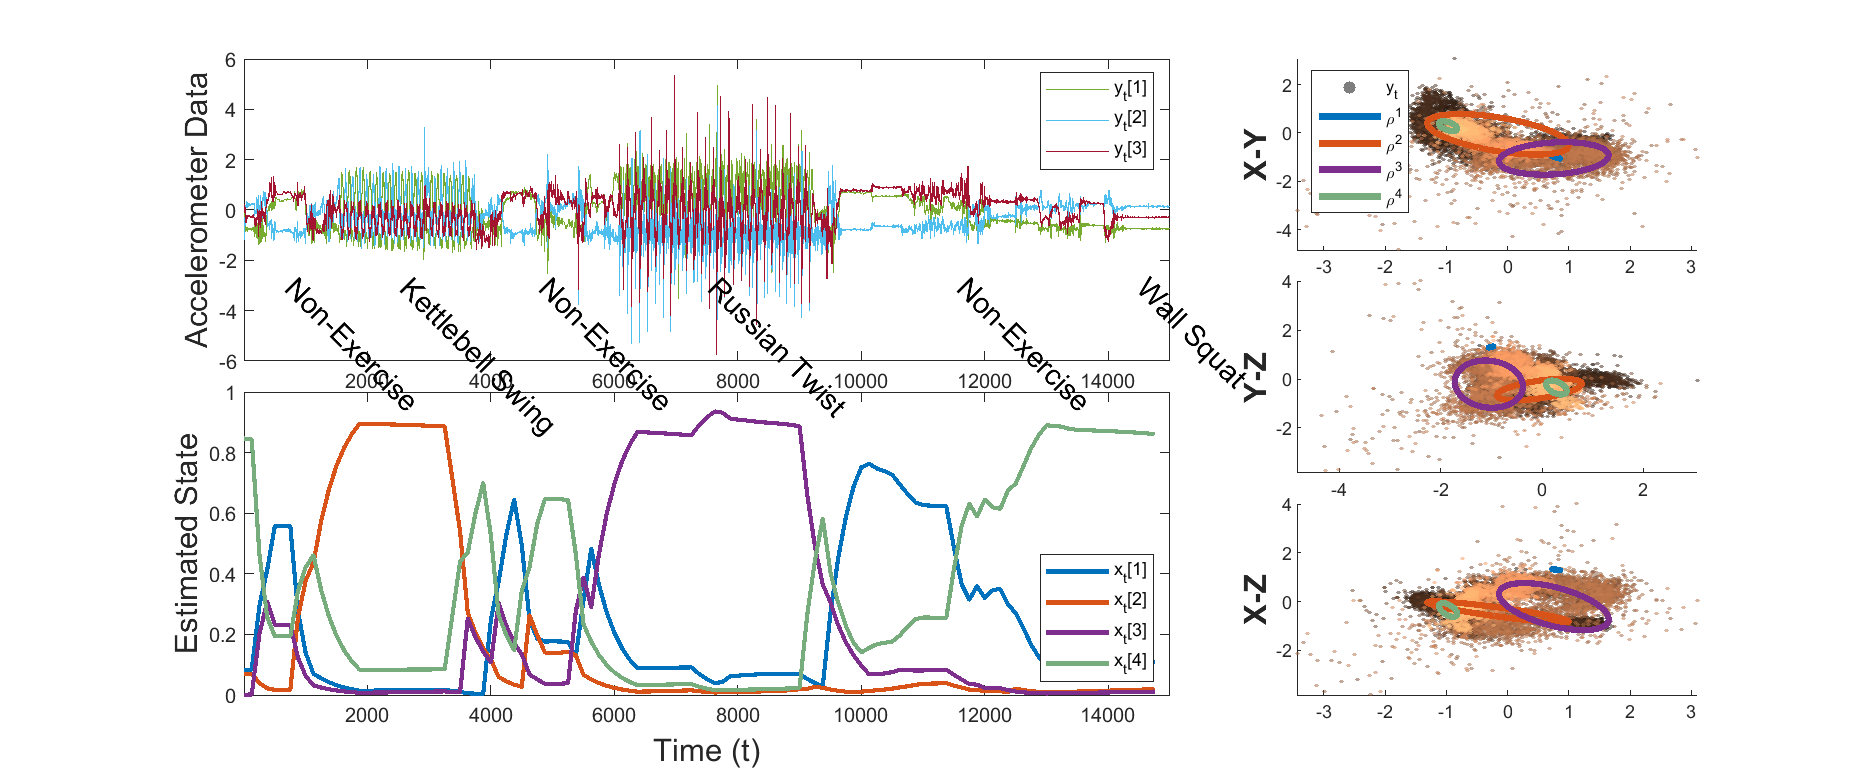

Supplement: Supplementary file 1 [file ebb71045453f38676c40deb9864f811d-Supplemental.zip › Supplement/MSR_Plots/subj014_3.png]

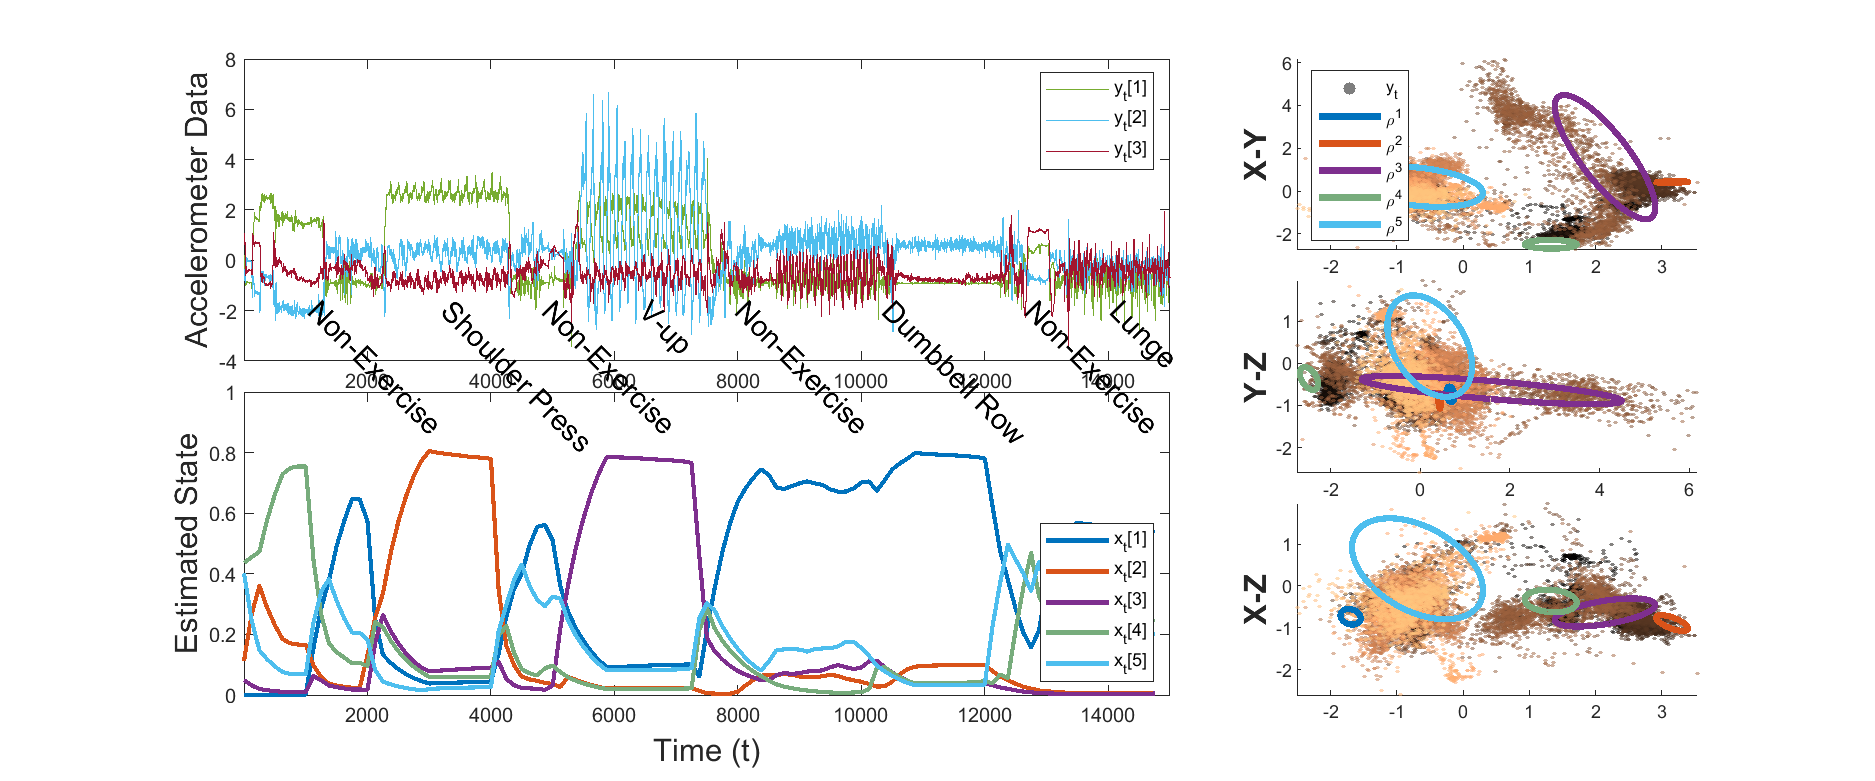

Supplement: Supplementary file 1 [file ebb71045453f38676c40deb9864f811d-Supplemental.zip › Supplement/MSR_Plots/subj015_1.png]

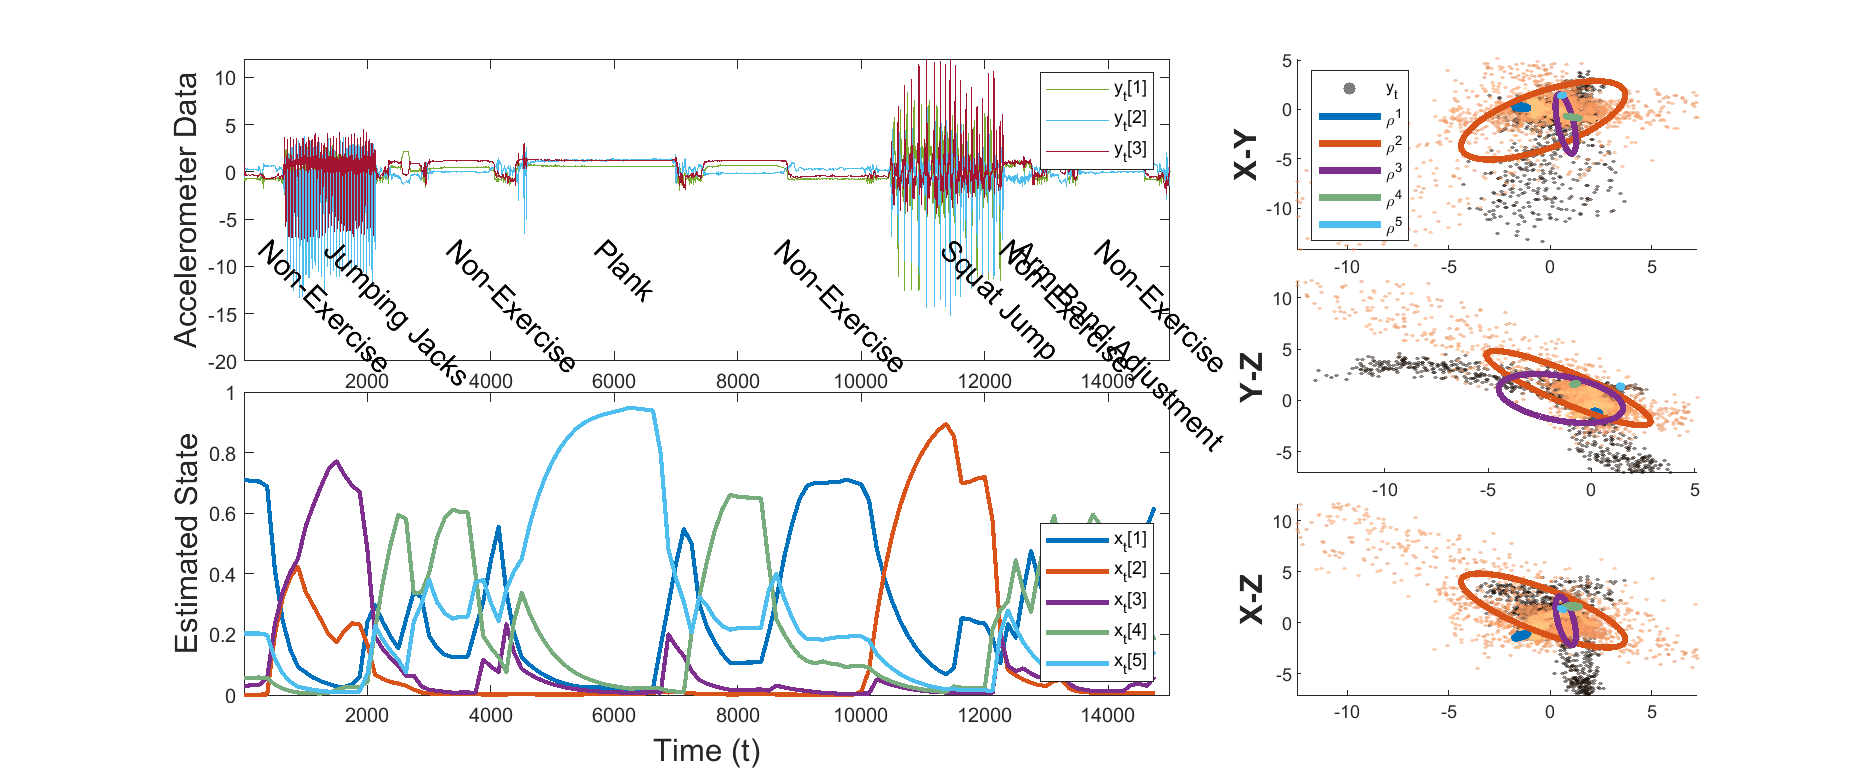

Supplement: Supplementary file 1 [file ebb71045453f38676c40deb9864f811d-Supplemental.zip › Supplement/MSR_Plots/subj015_2.png]

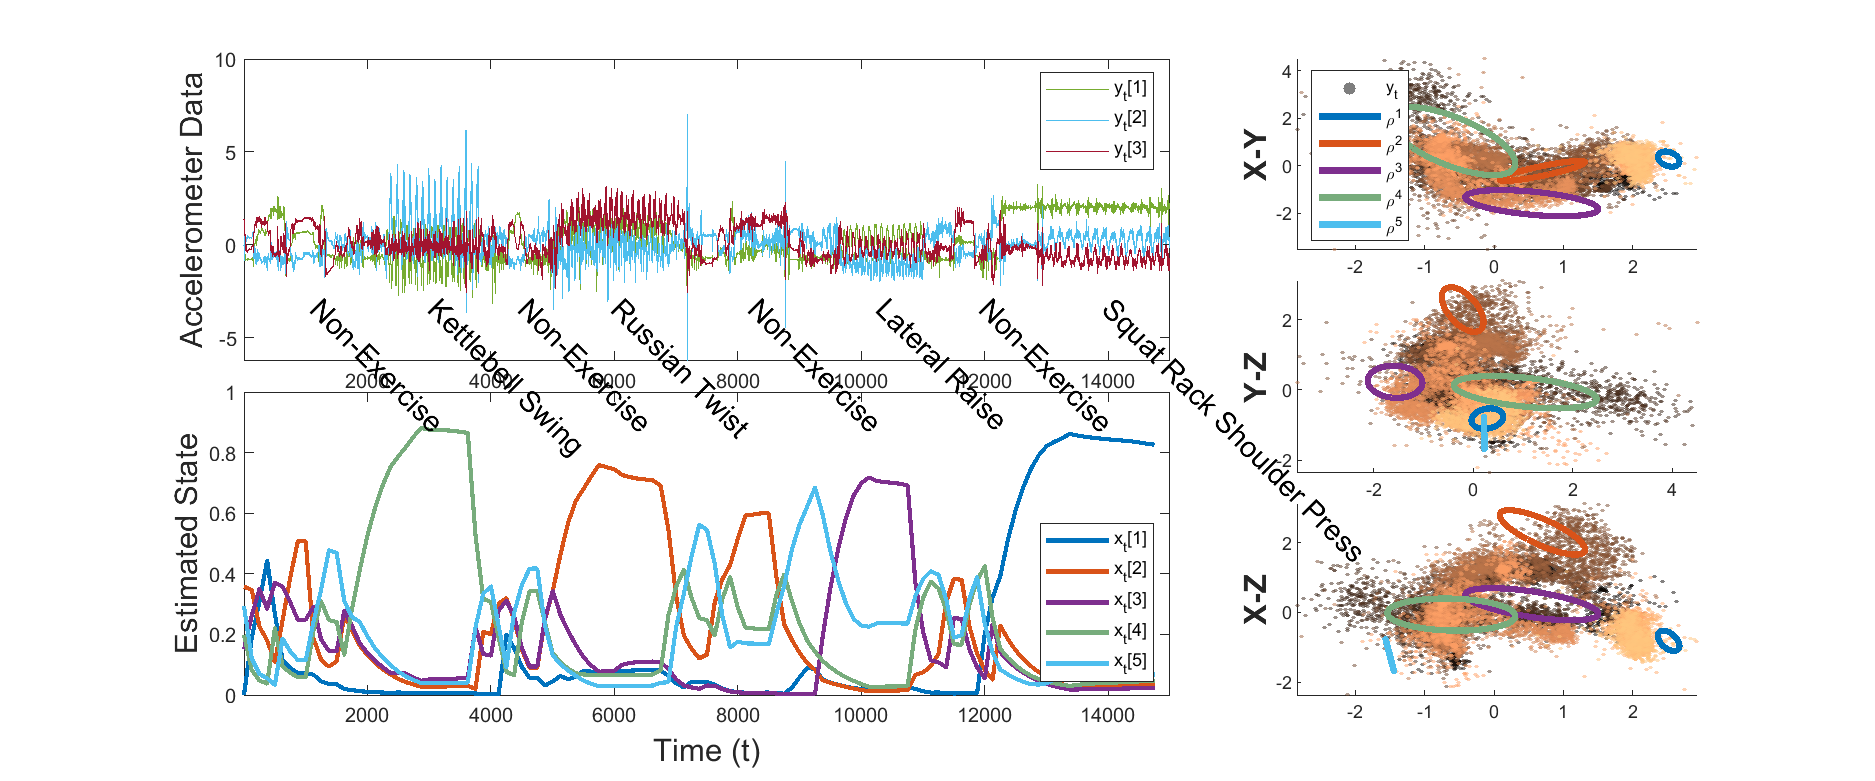

Supplement: Supplementary file 1 [file ebb71045453f38676c40deb9864f811d-Supplemental.zip › Supplement/MSR_Plots/subj015_3.png]

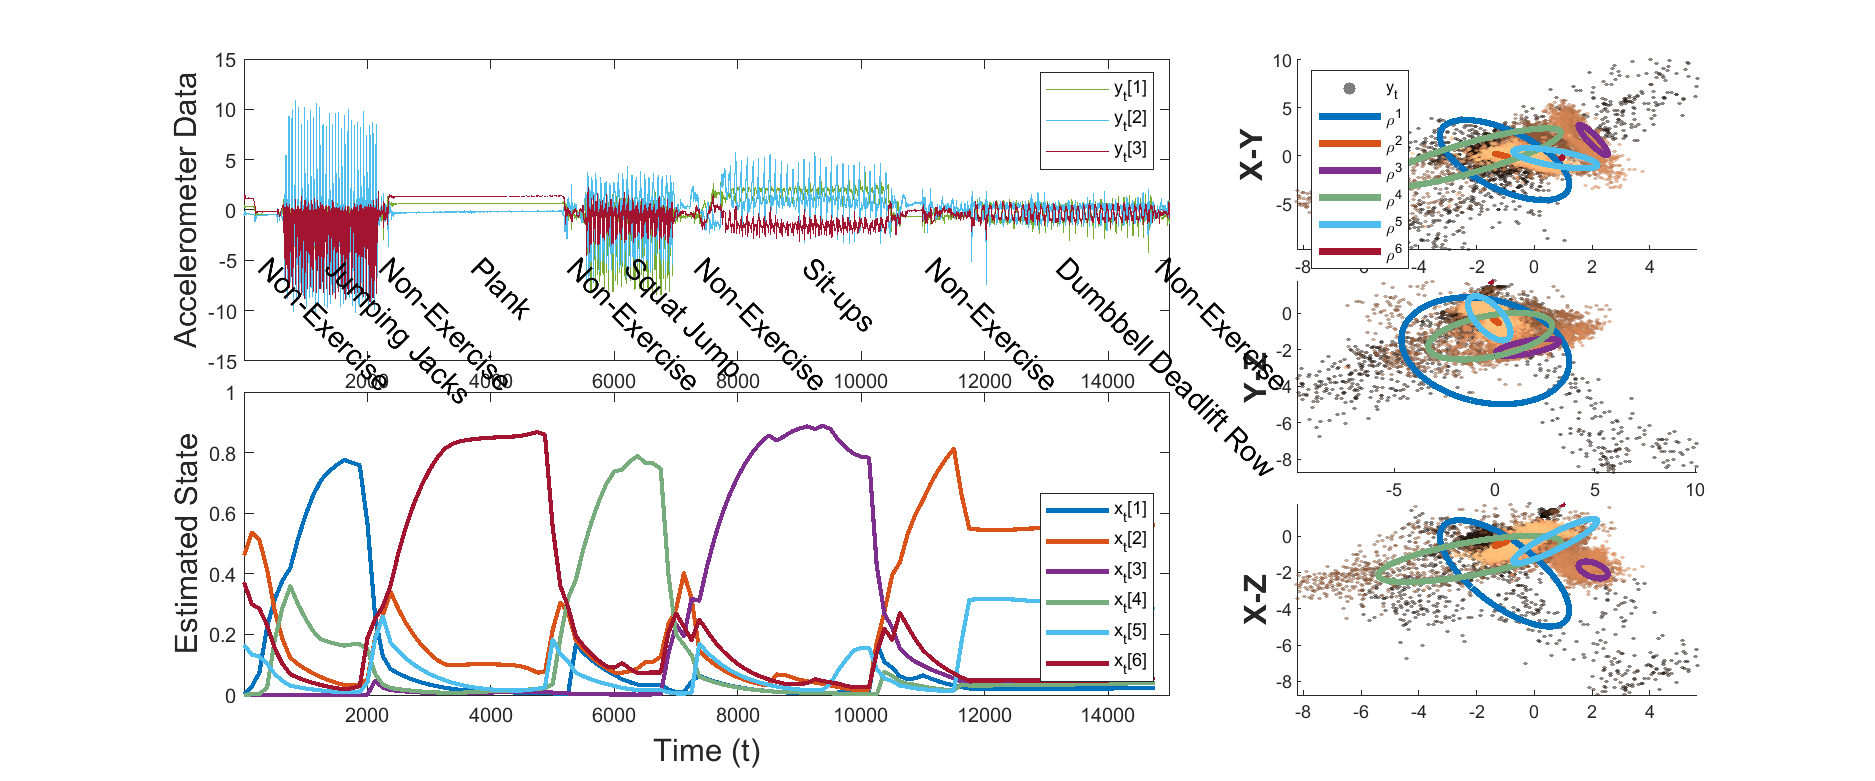

Supplement: Supplementary file 1 [file ebb71045453f38676c40deb9864f811d-Supplemental.zip › Supplement/MSR_Plots/subj016_1.png]

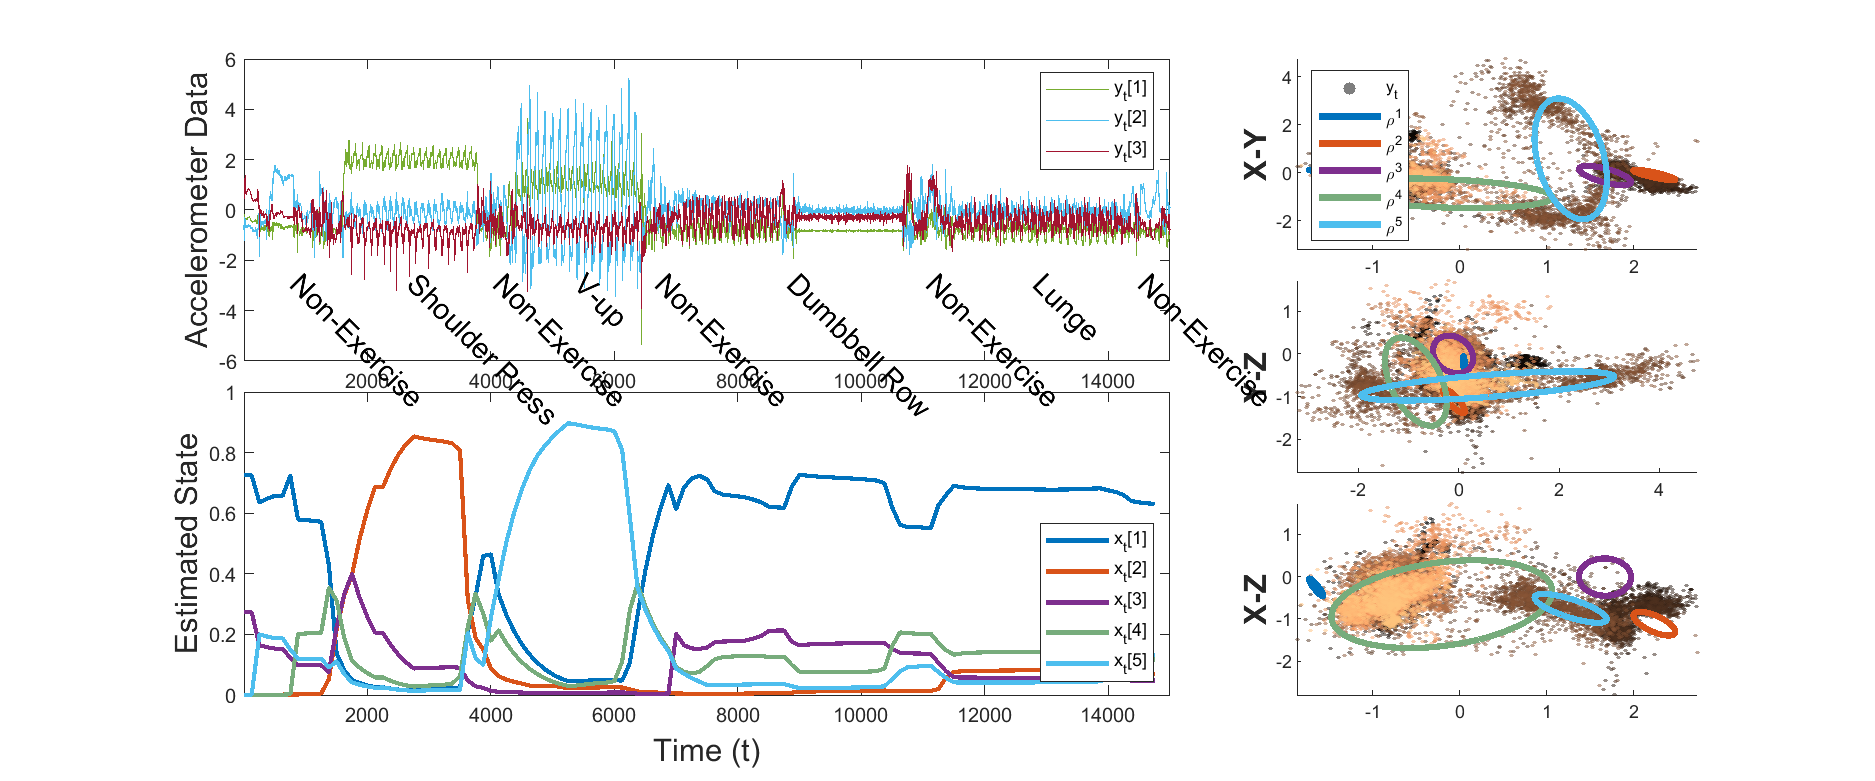

Supplement: Supplementary file 1 [file ebb71045453f38676c40deb9864f811d-Supplemental.zip › Supplement/MSR_Plots/subj016_2.png]

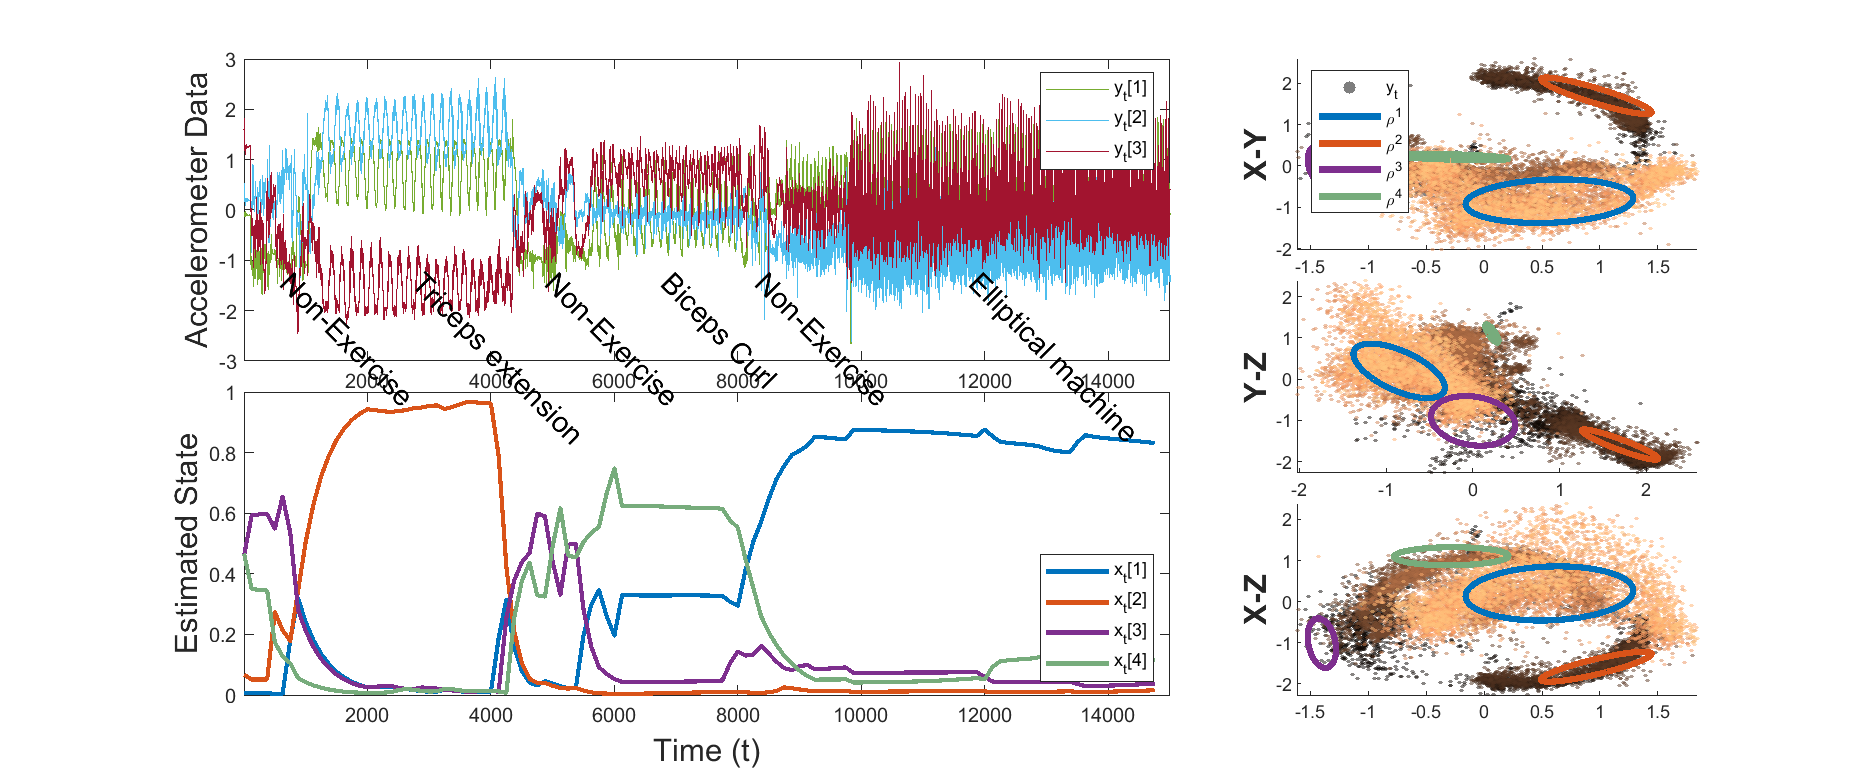

Supplement: Supplementary file 1 [file ebb71045453f38676c40deb9864f811d-Supplemental.zip › Supplement/MSR_Plots/subj016_3.png]

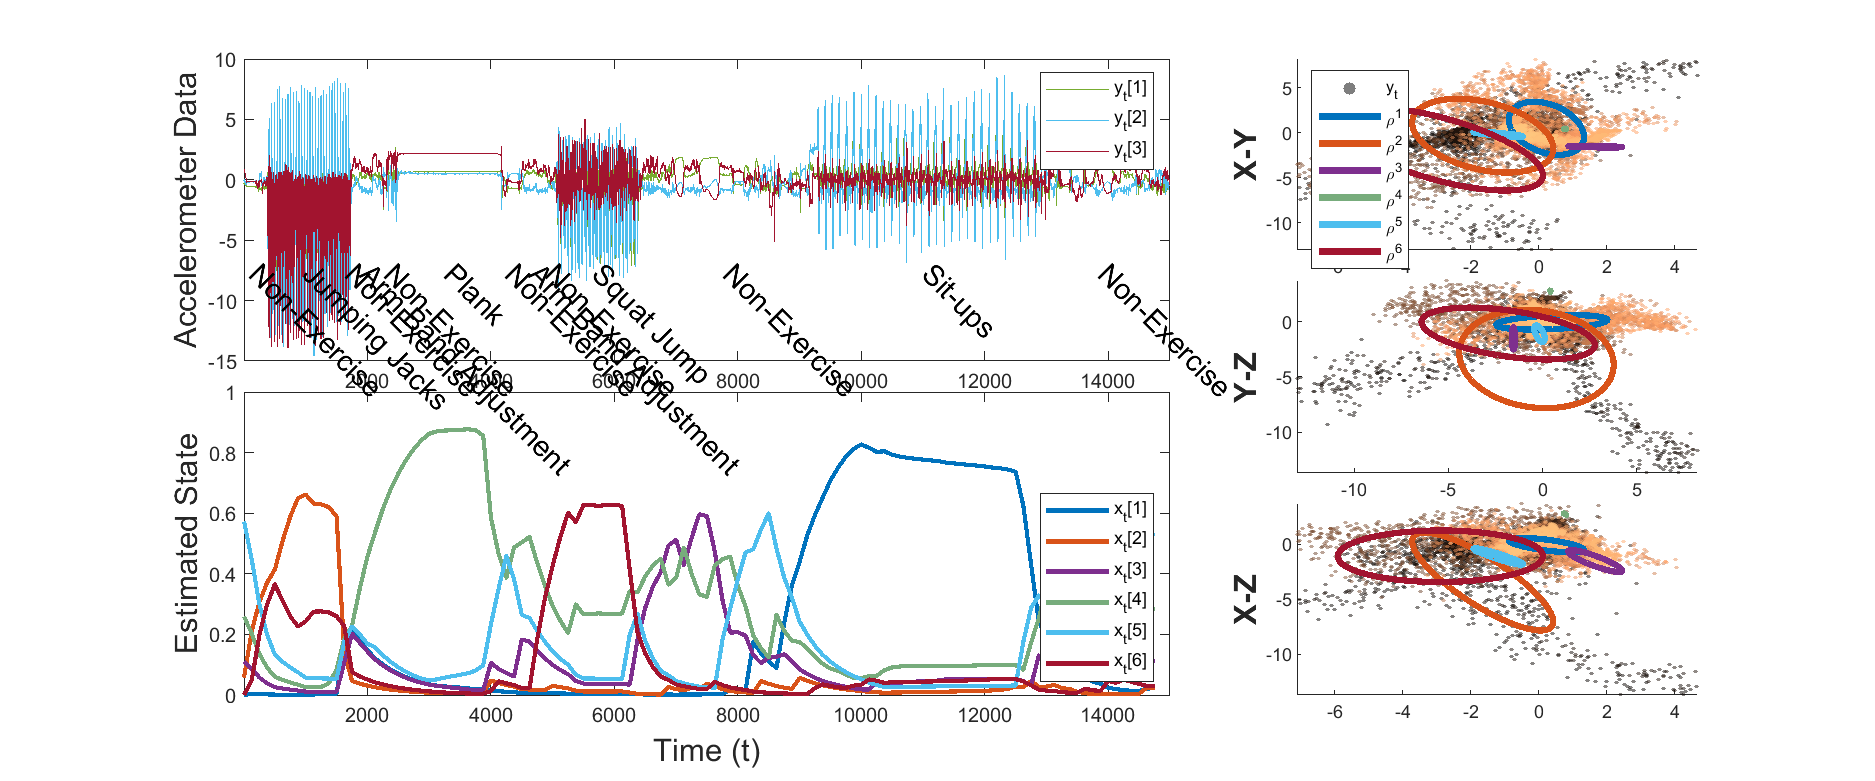

Supplement: Supplementary file 1 [file ebb71045453f38676c40deb9864f811d-Supplemental.zip › Supplement/MSR_Plots/subj017_1.png]

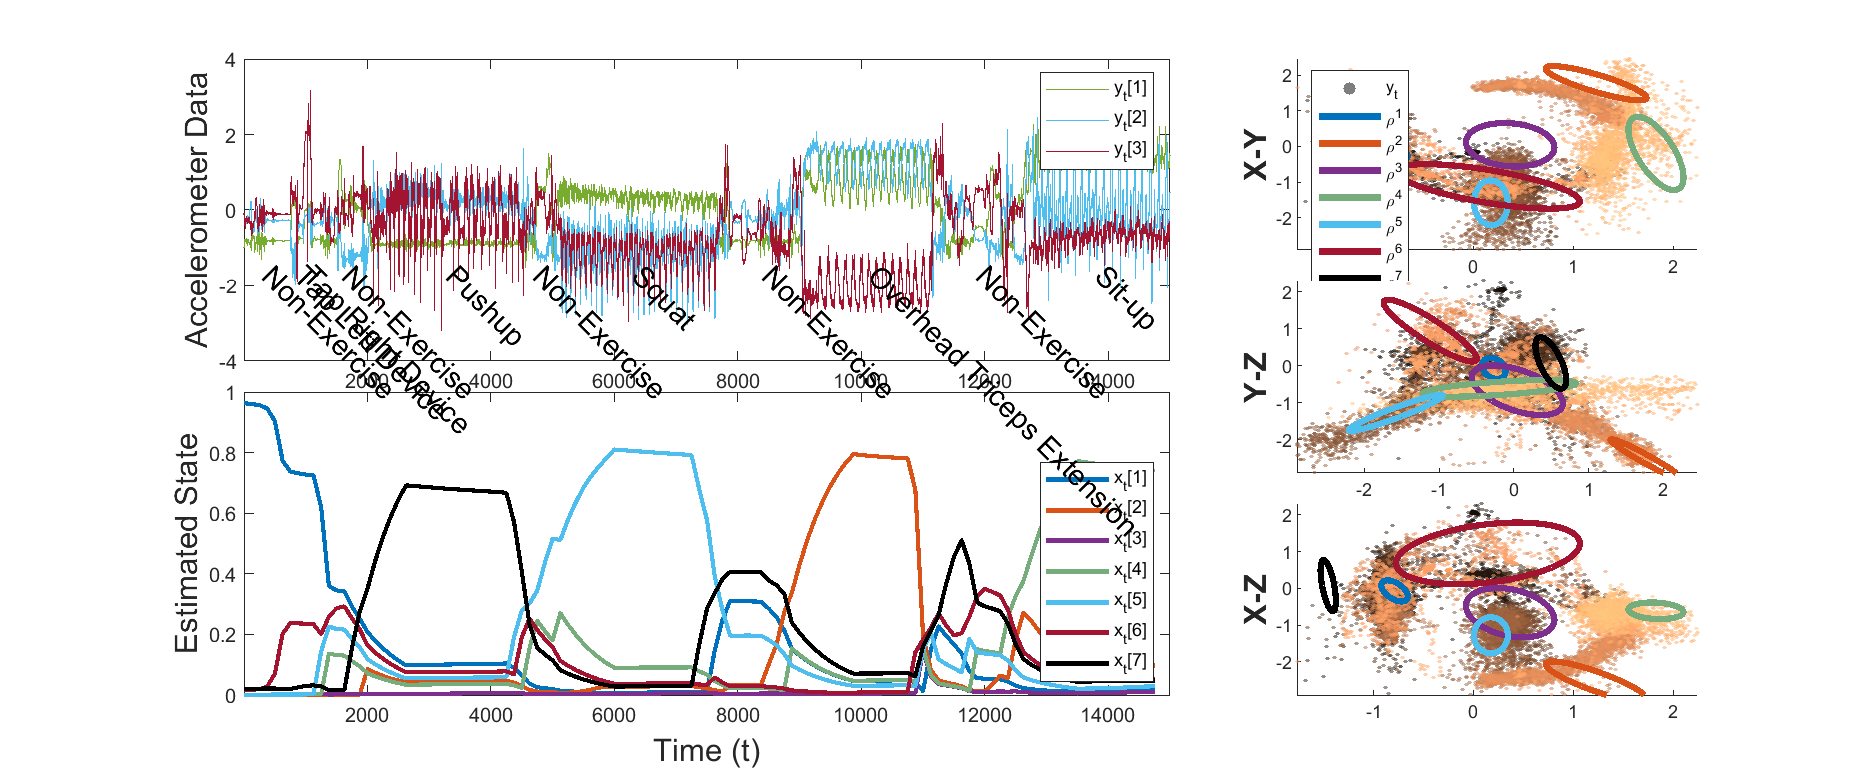

Supplement: Supplementary file 1 [file ebb71045453f38676c40deb9864f811d-Supplemental.zip › Supplement/MSR_Plots/subj017_2.png]

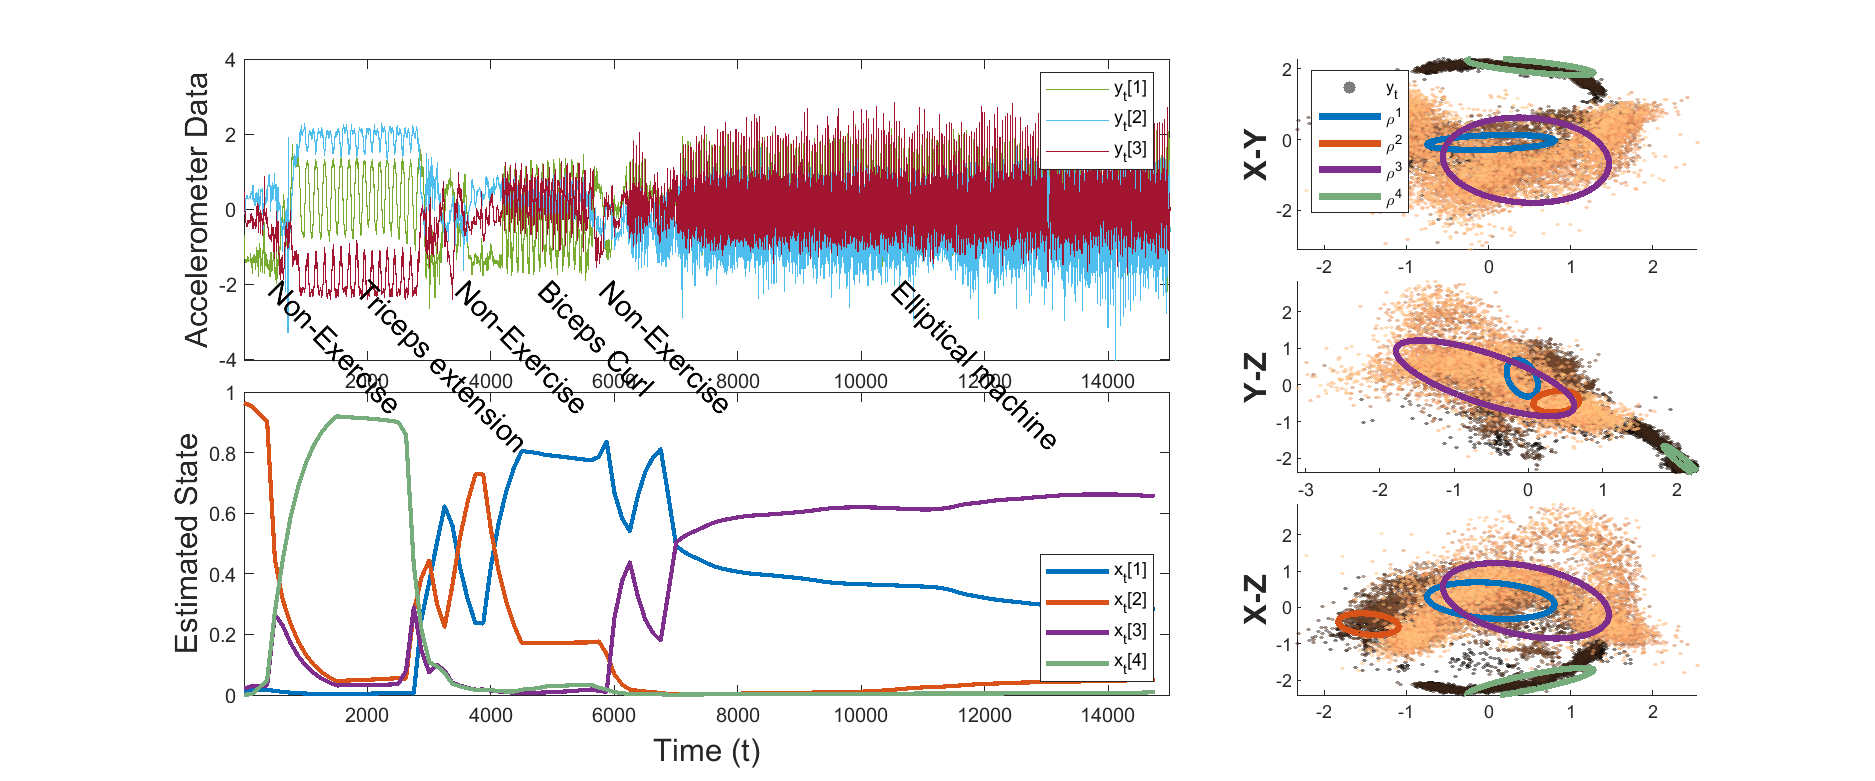

Supplement: Supplementary file 1 [file ebb71045453f38676c40deb9864f811d-Supplemental.zip › Supplement/MSR_Plots/subj017_3.png]

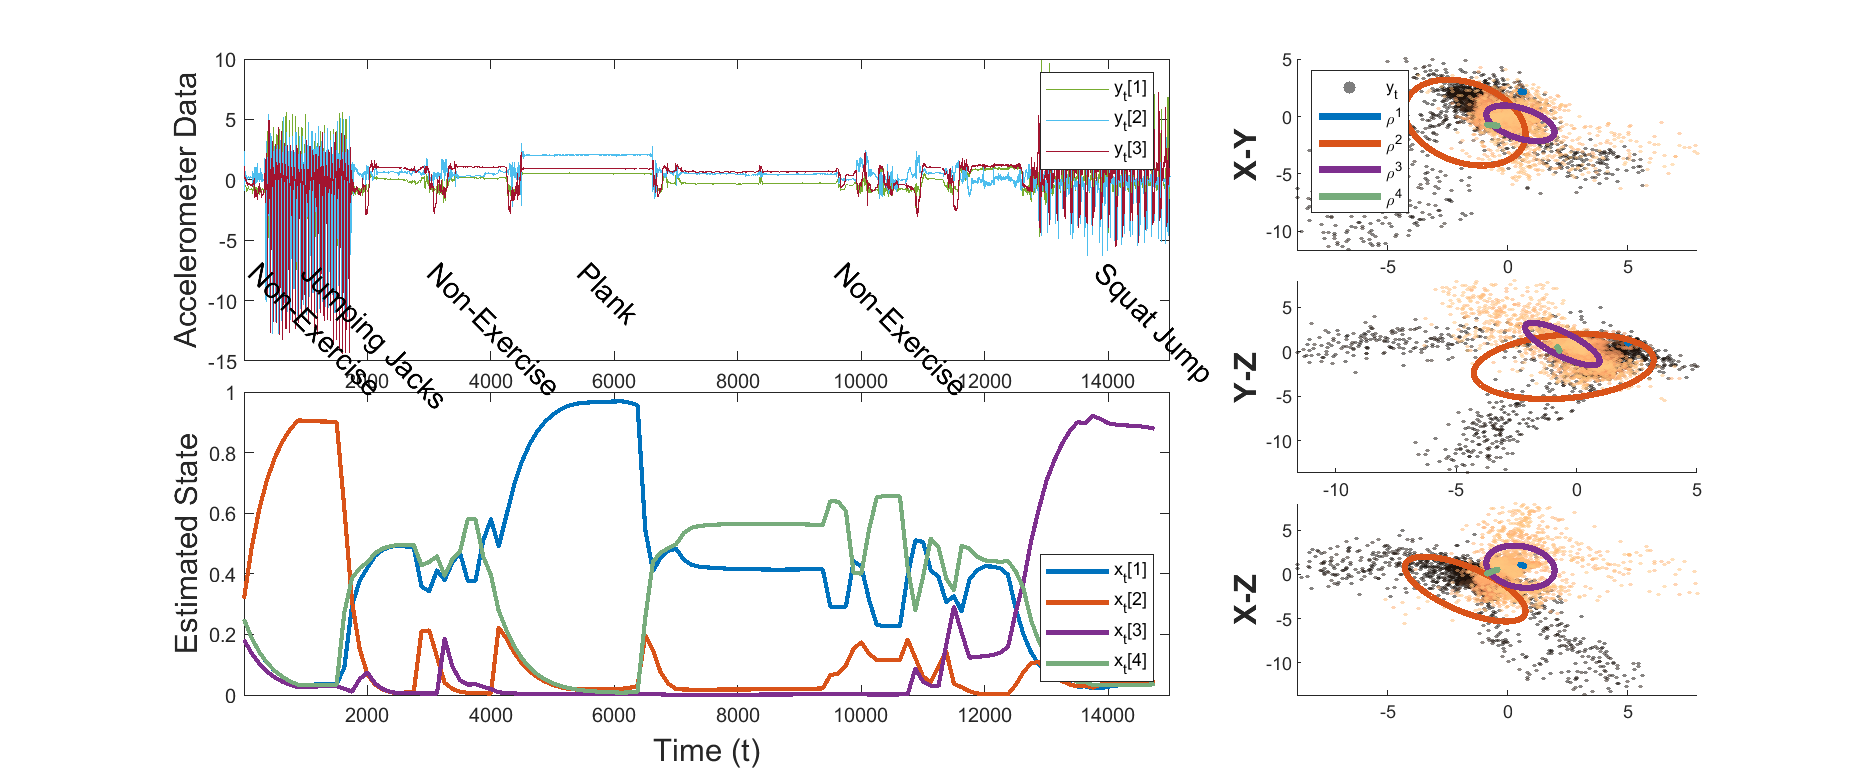

Supplement: Supplementary file 1 [file ebb71045453f38676c40deb9864f811d-Supplemental.zip › Supplement/MSR_Plots/subj018_1.png]

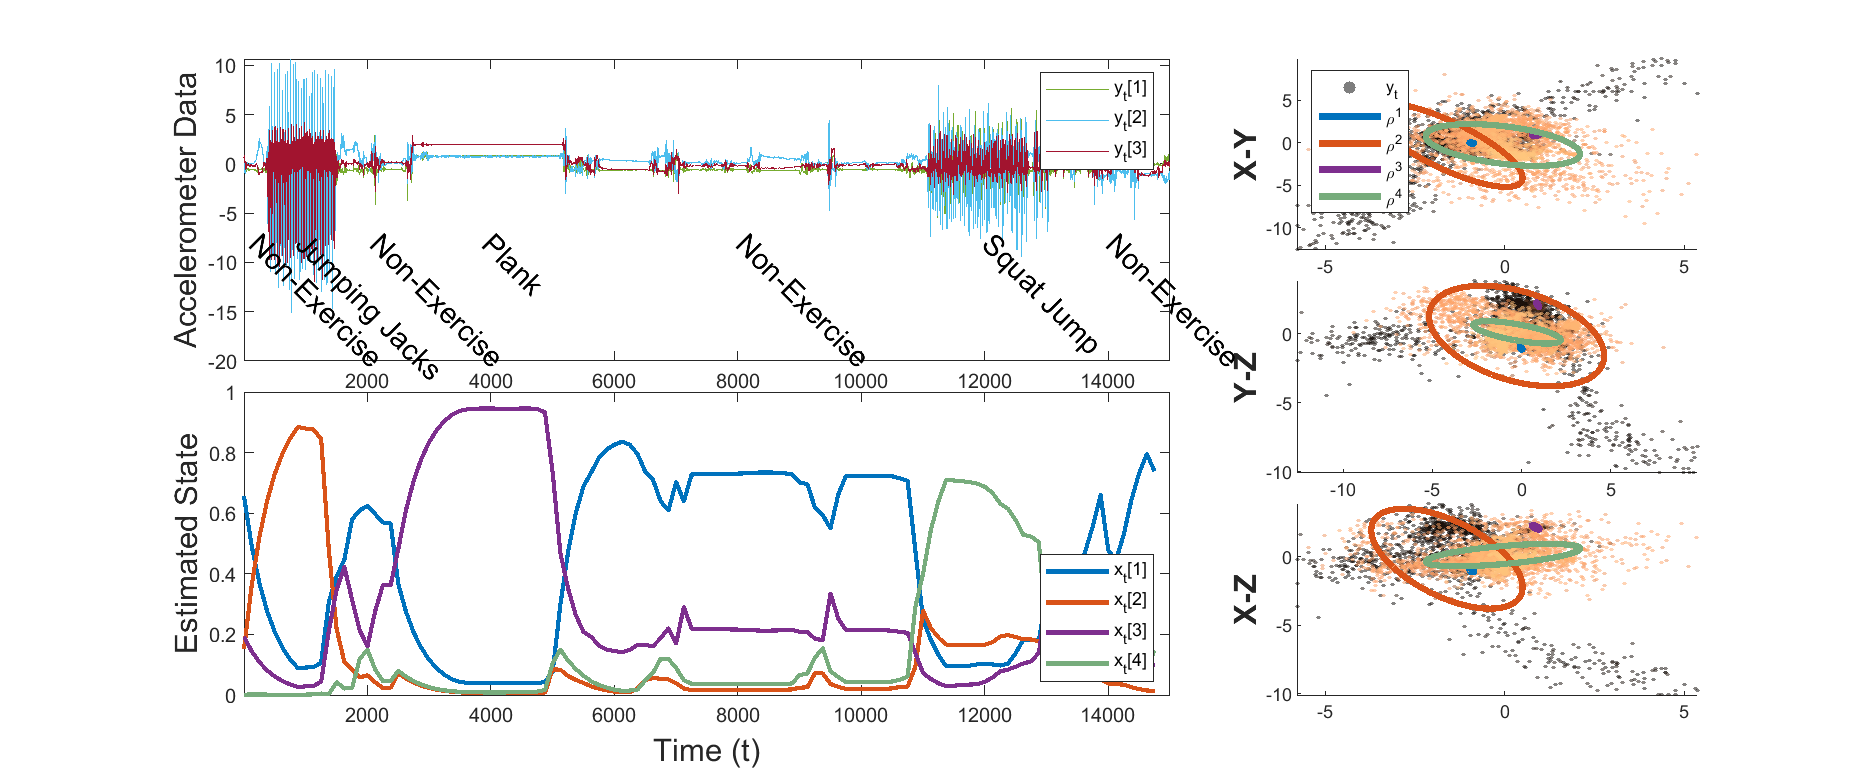

Supplement: Supplementary file 1 [file ebb71045453f38676c40deb9864f811d-Supplemental.zip › Supplement/MSR_Plots/subj019_1.png]

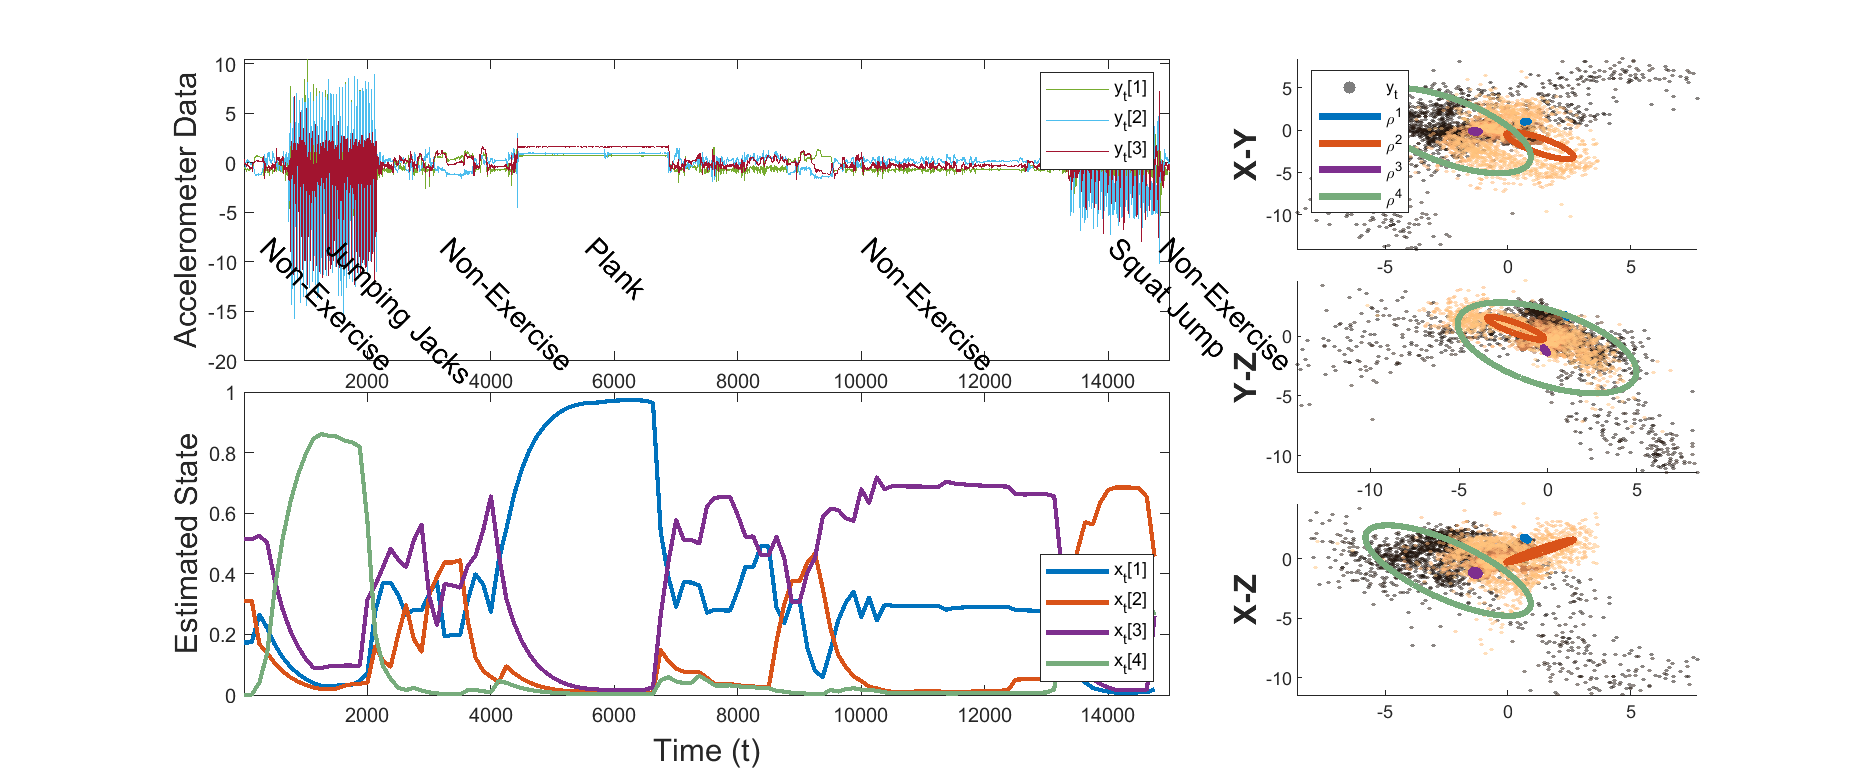

Supplement: Supplementary file 1 [file ebb71045453f38676c40deb9864f811d-Supplemental.zip › Supplement/MSR_Plots/subj020_1.png]

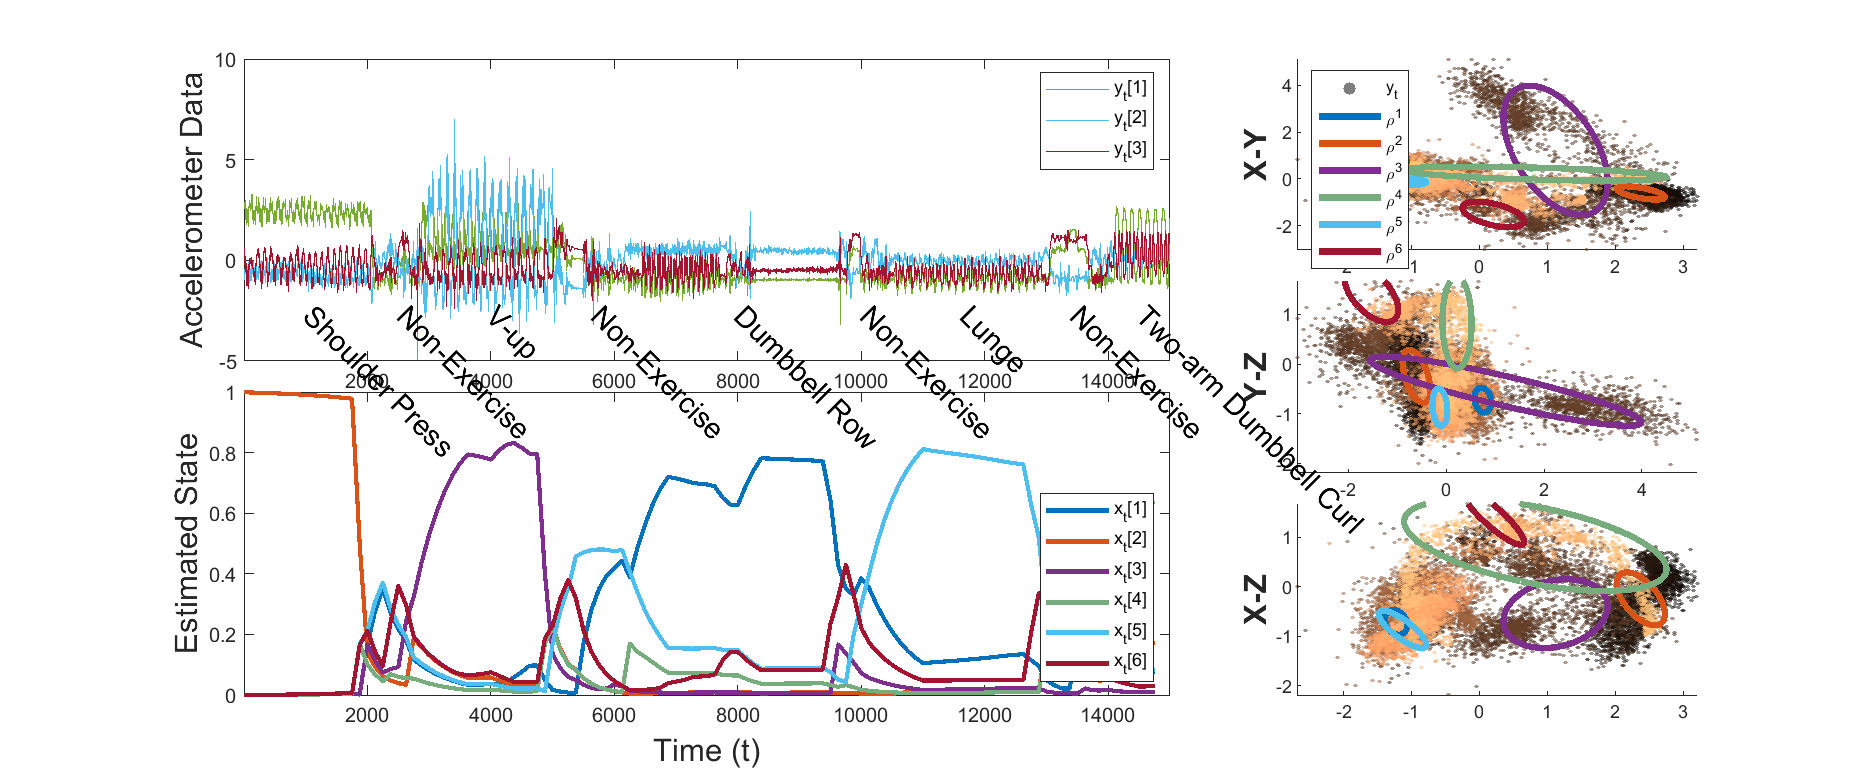

Supplement: Supplementary file 1 [file ebb71045453f38676c40deb9864f811d-Supplemental.zip › Supplement/MSR_Plots/subj021_1.png]

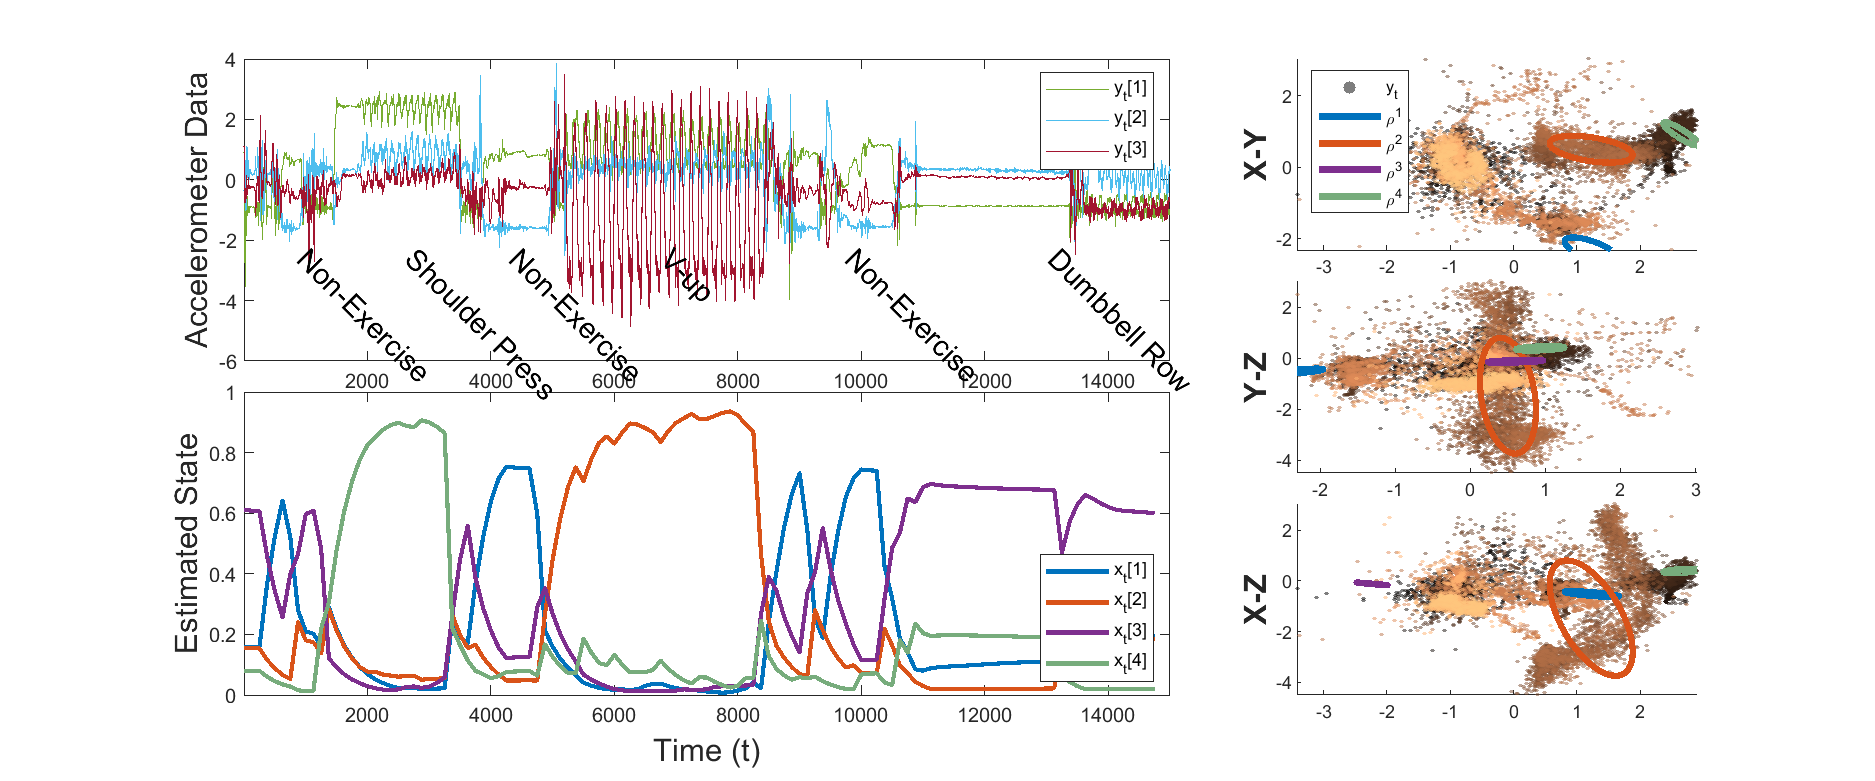

Supplement: Supplementary file 1 [file ebb71045453f38676c40deb9864f811d-Supplemental.zip › Supplement/MSR_Plots/subj022_1.png]

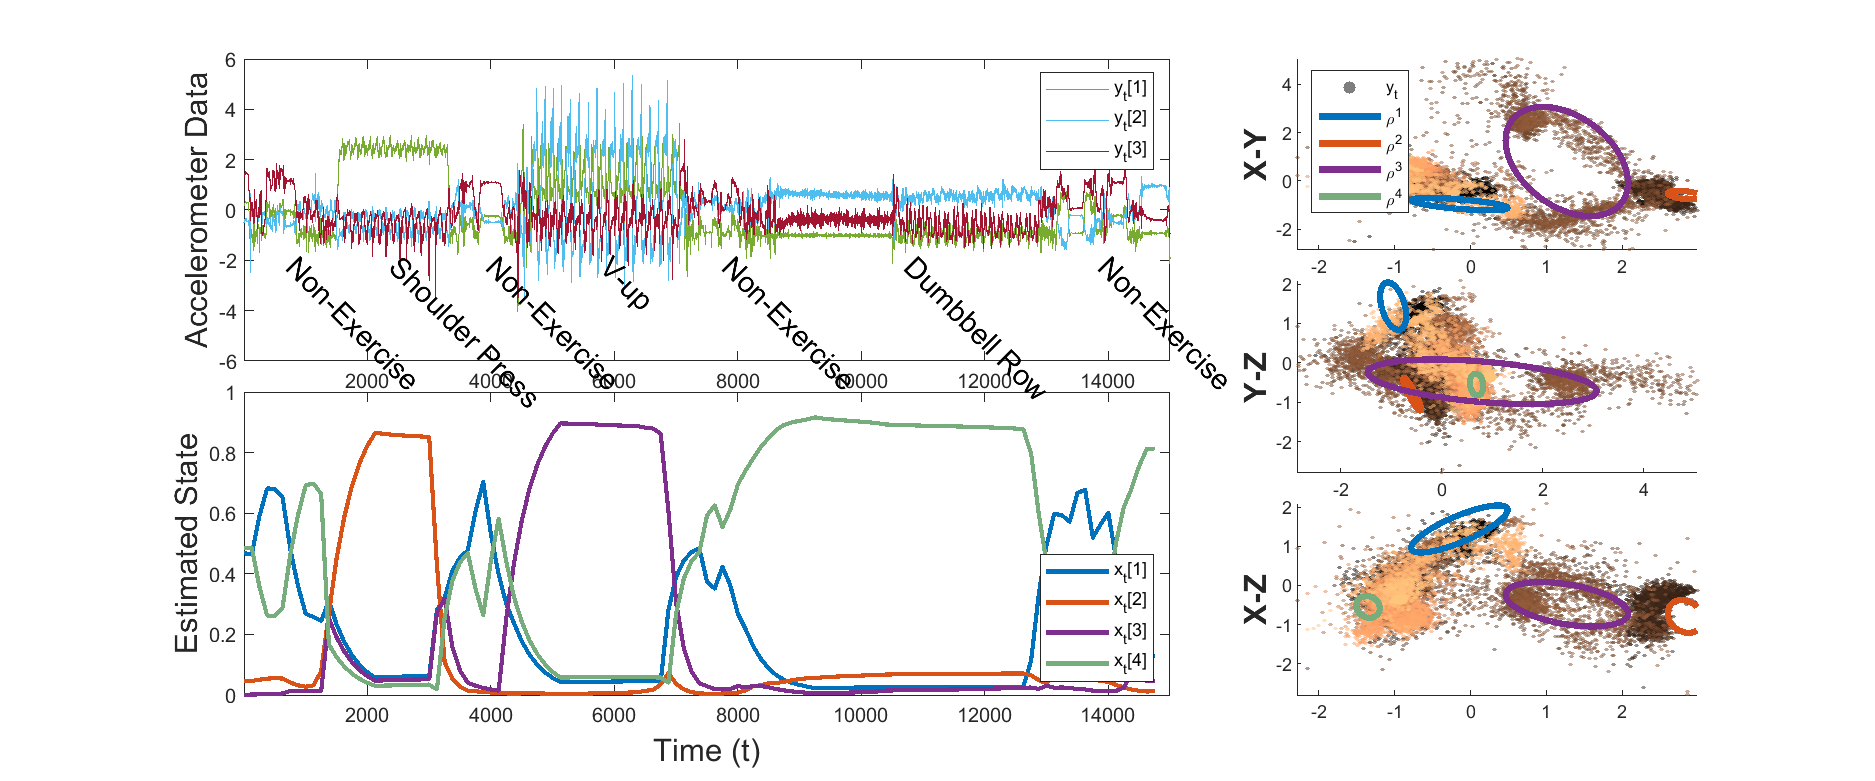

Supplement: Supplementary file 1 [file ebb71045453f38676c40deb9864f811d-Supplemental.zip › Supplement/MSR_Plots/subj023_1.png]

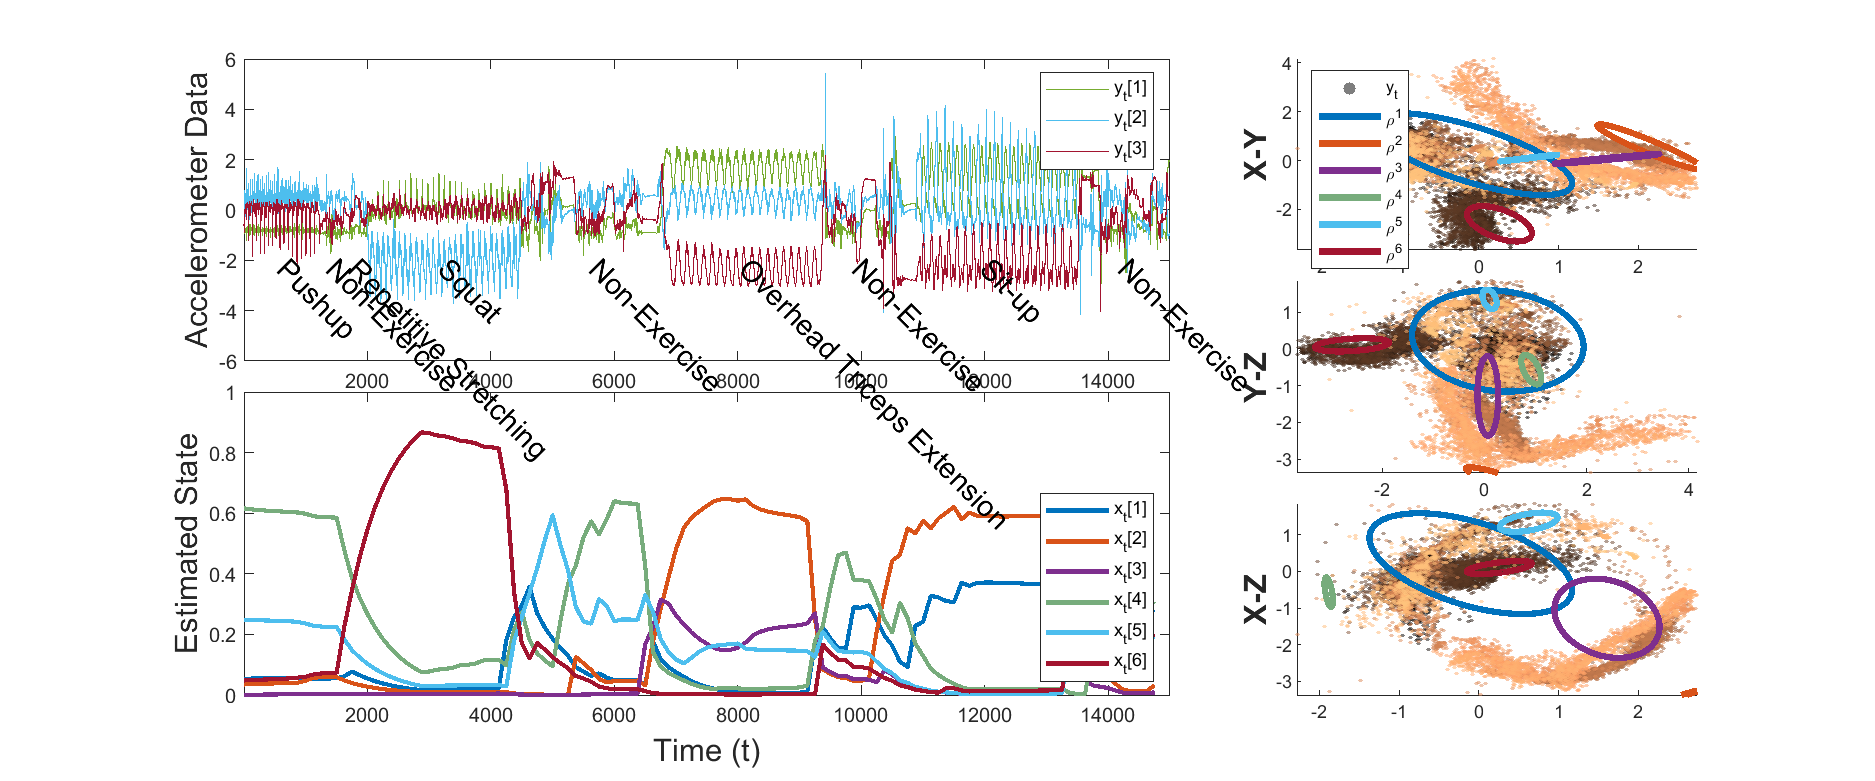

Supplement: Supplementary file 1 [file ebb71045453f38676c40deb9864f811d-Supplemental.zip › Supplement/MSR_Plots/subj024_1.png]

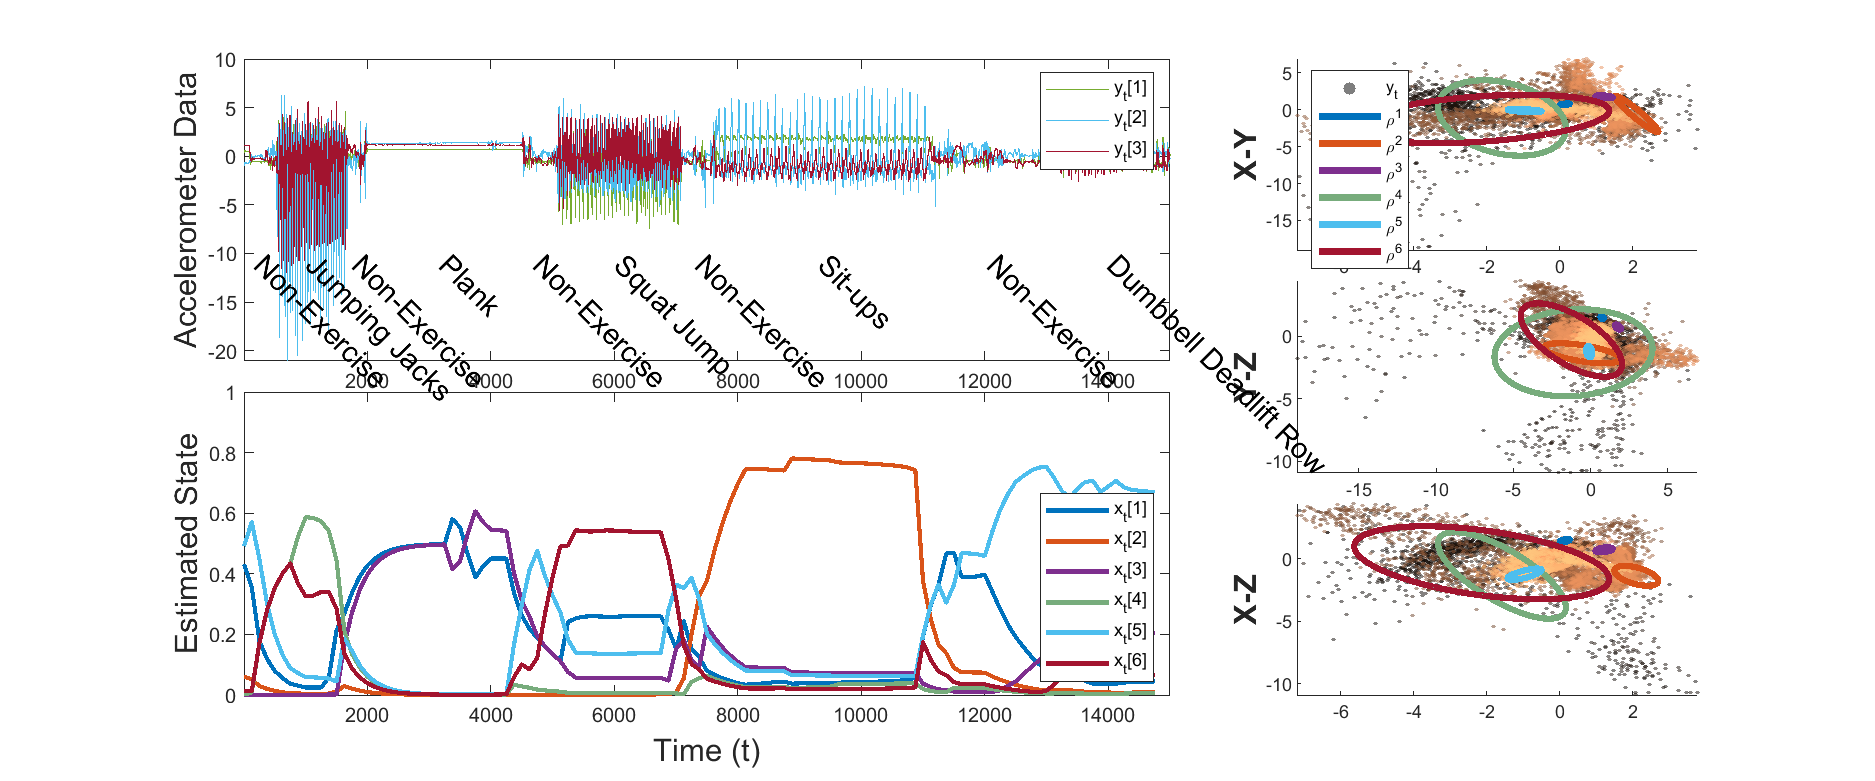

Supplement: Supplementary file 1 [file ebb71045453f38676c40deb9864f811d-Supplemental.zip › Supplement/MSR_Plots/subj025_1.png]

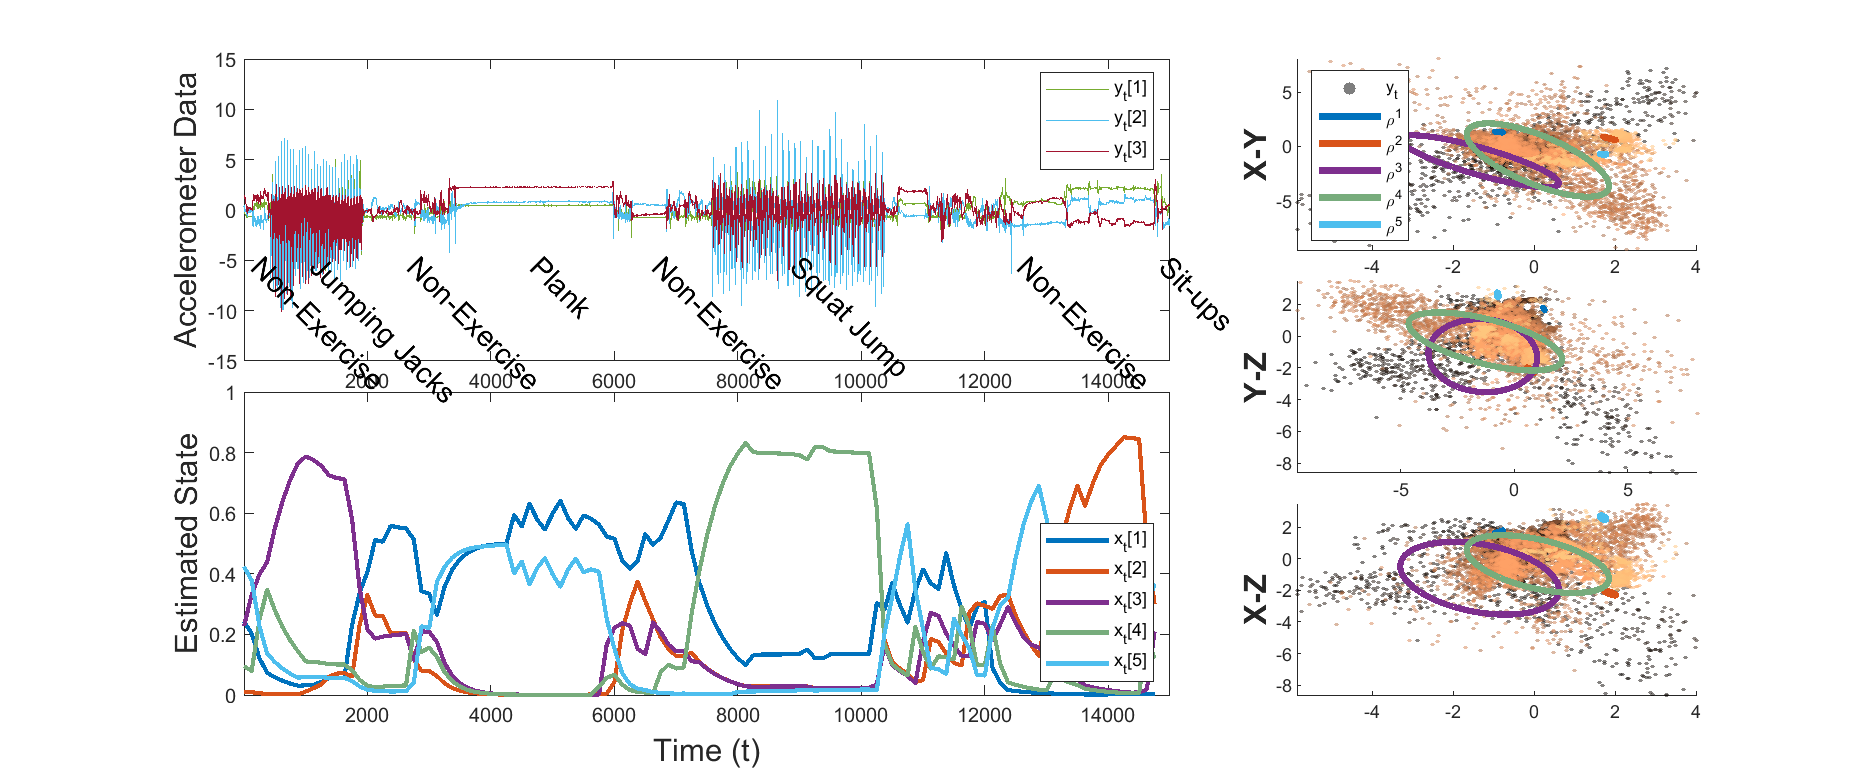

Supplement: Supplementary file 1 [file ebb71045453f38676c40deb9864f811d-Supplemental.zip › Supplement/MSR_Plots/subj026_1.png]

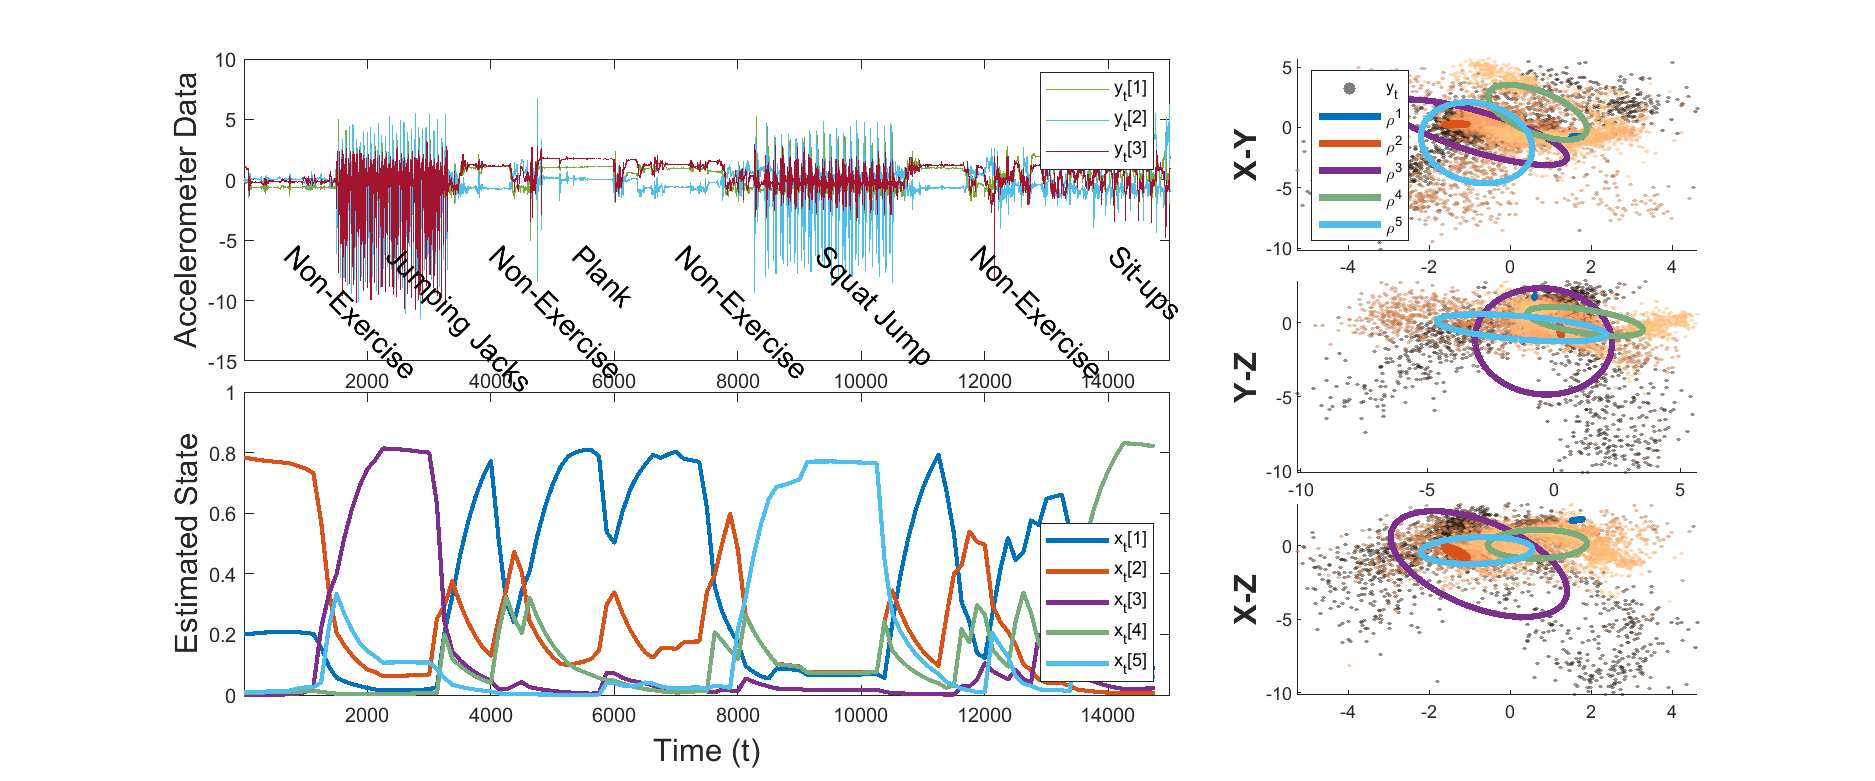

Supplement: Supplementary file 1 [file ebb71045453f38676c40deb9864f811d-Supplemental.zip › Supplement/MSR_Plots/subj027_1.png]

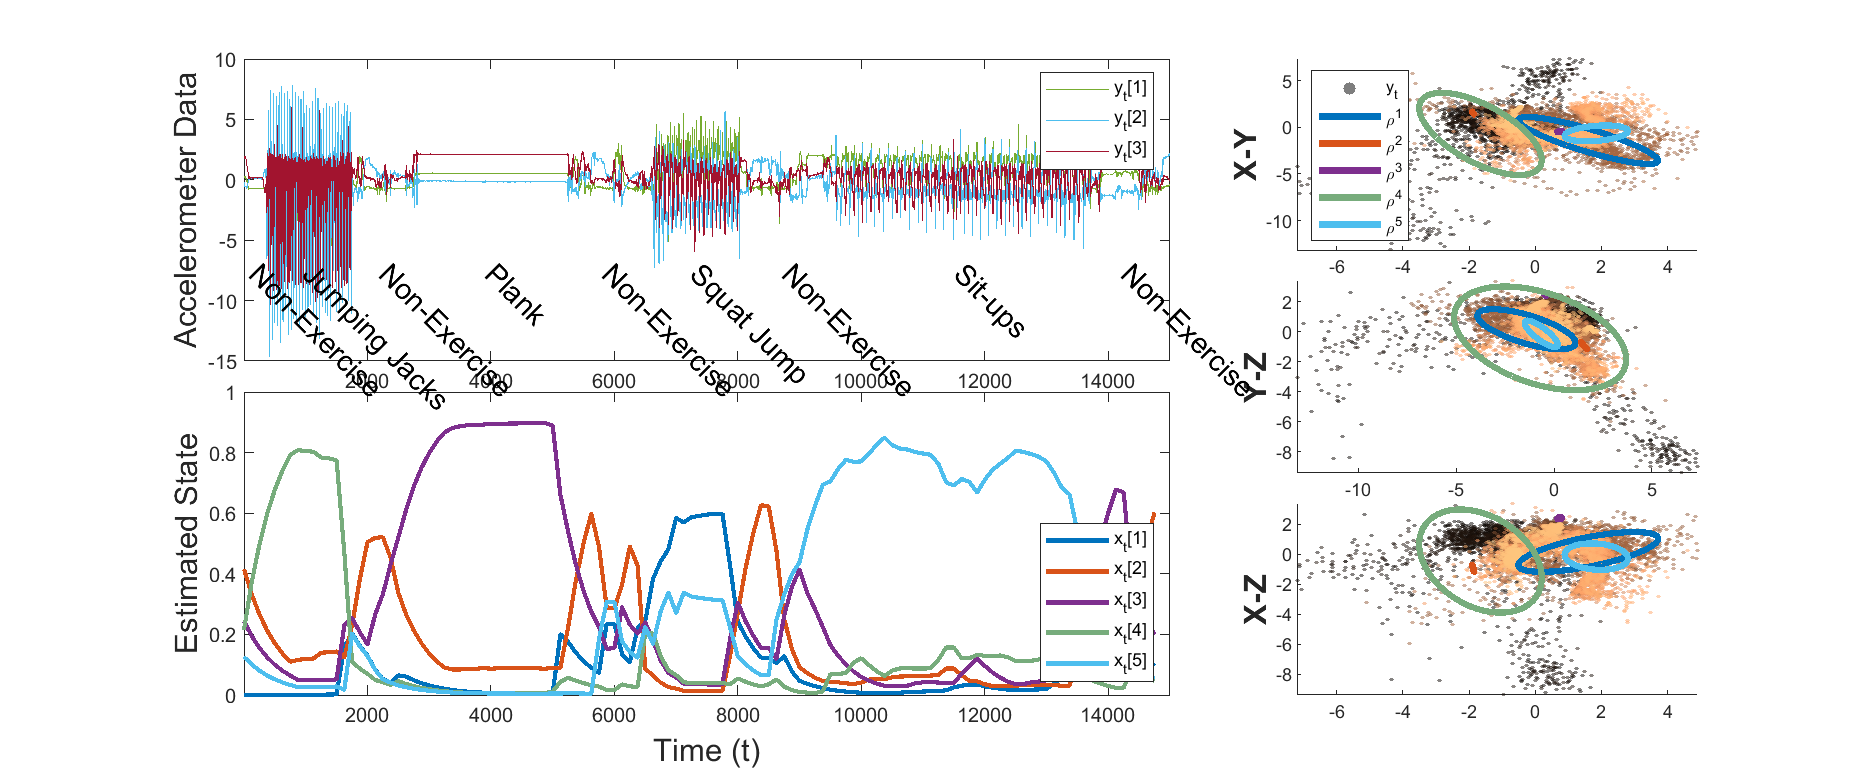

Supplement: Supplementary file 1 [file ebb71045453f38676c40deb9864f811d-Supplemental.zip › Supplement/MSR_Plots/subj028_1.png]

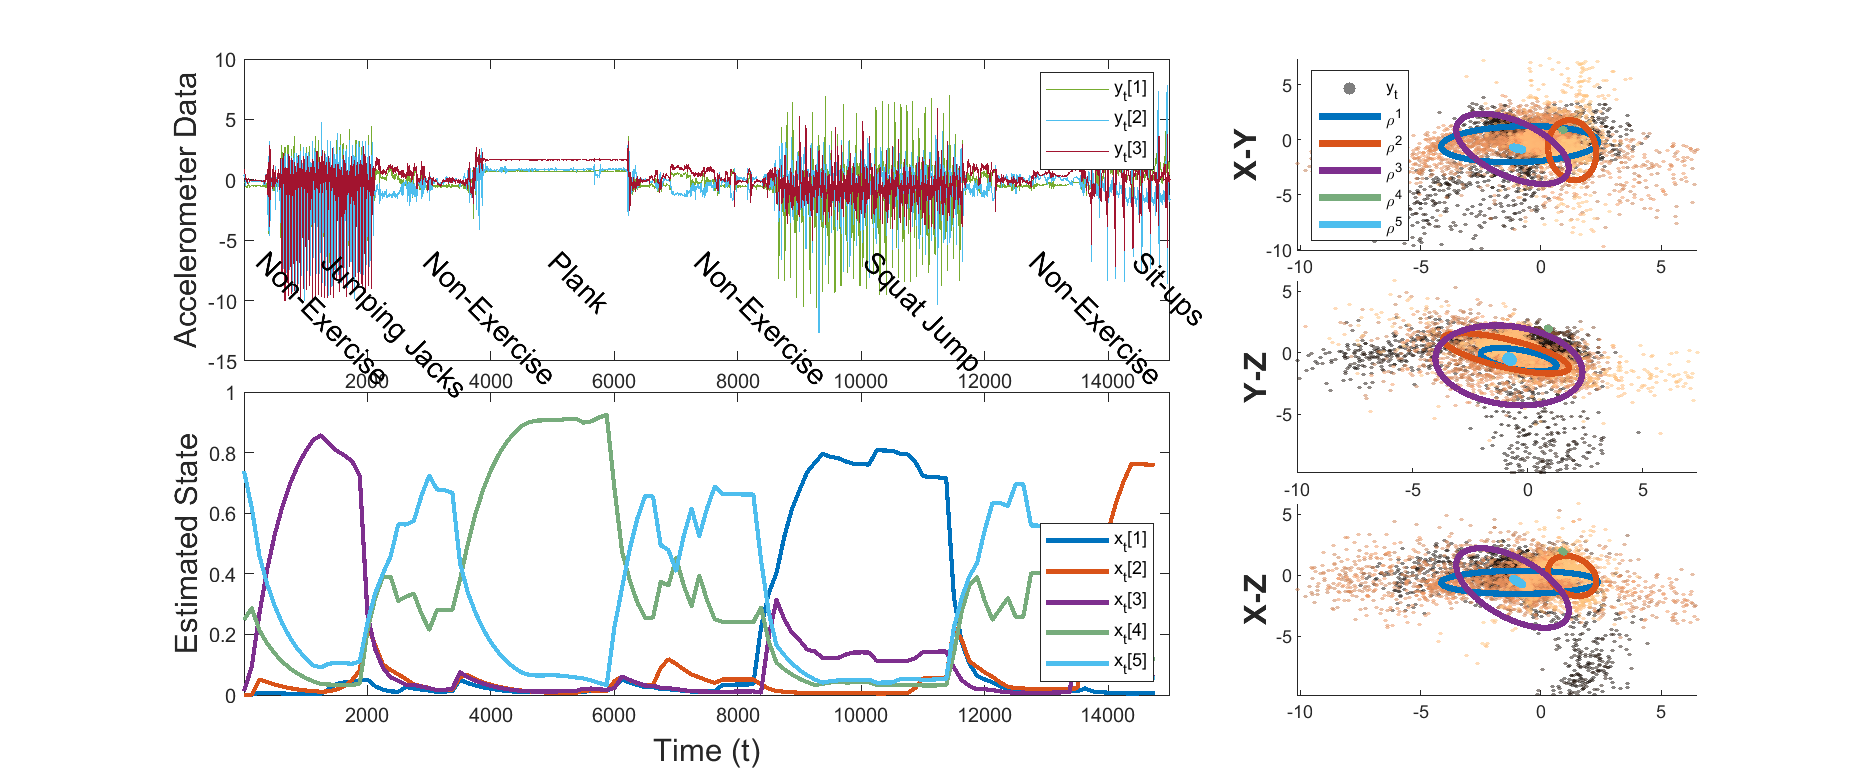

Supplement: Supplementary file 1 [file ebb71045453f38676c40deb9864f811d-Supplemental.zip › Supplement/MSR_Plots/subj029_1.png]

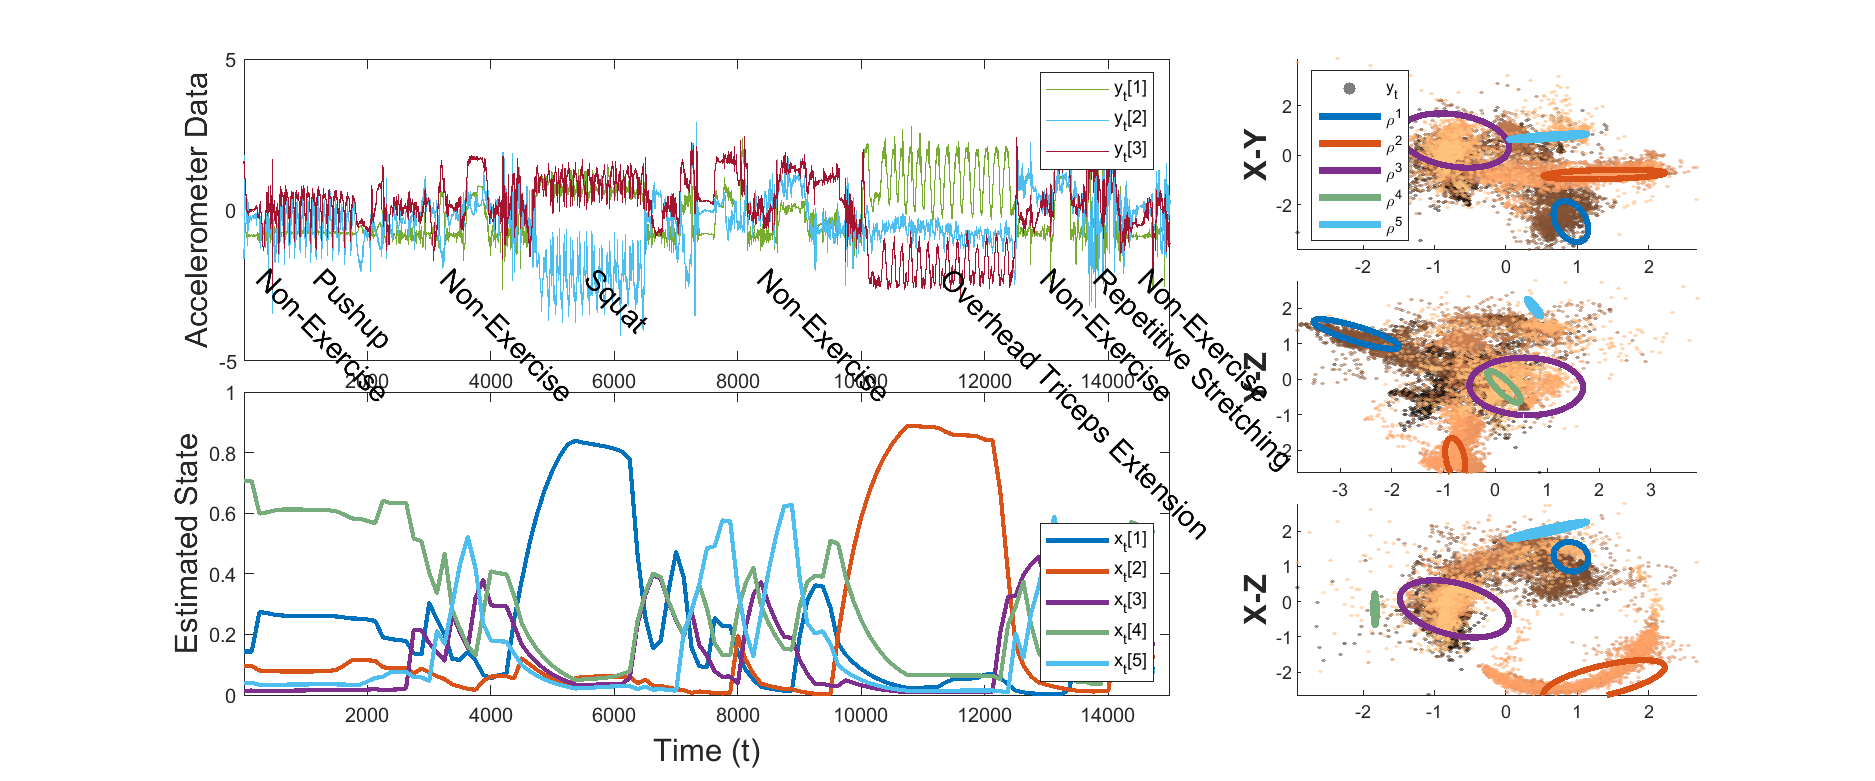

Supplement: Supplementary file 1 [file ebb71045453f38676c40deb9864f811d-Supplemental.zip › Supplement/MSR_Plots/subj030_1.png]

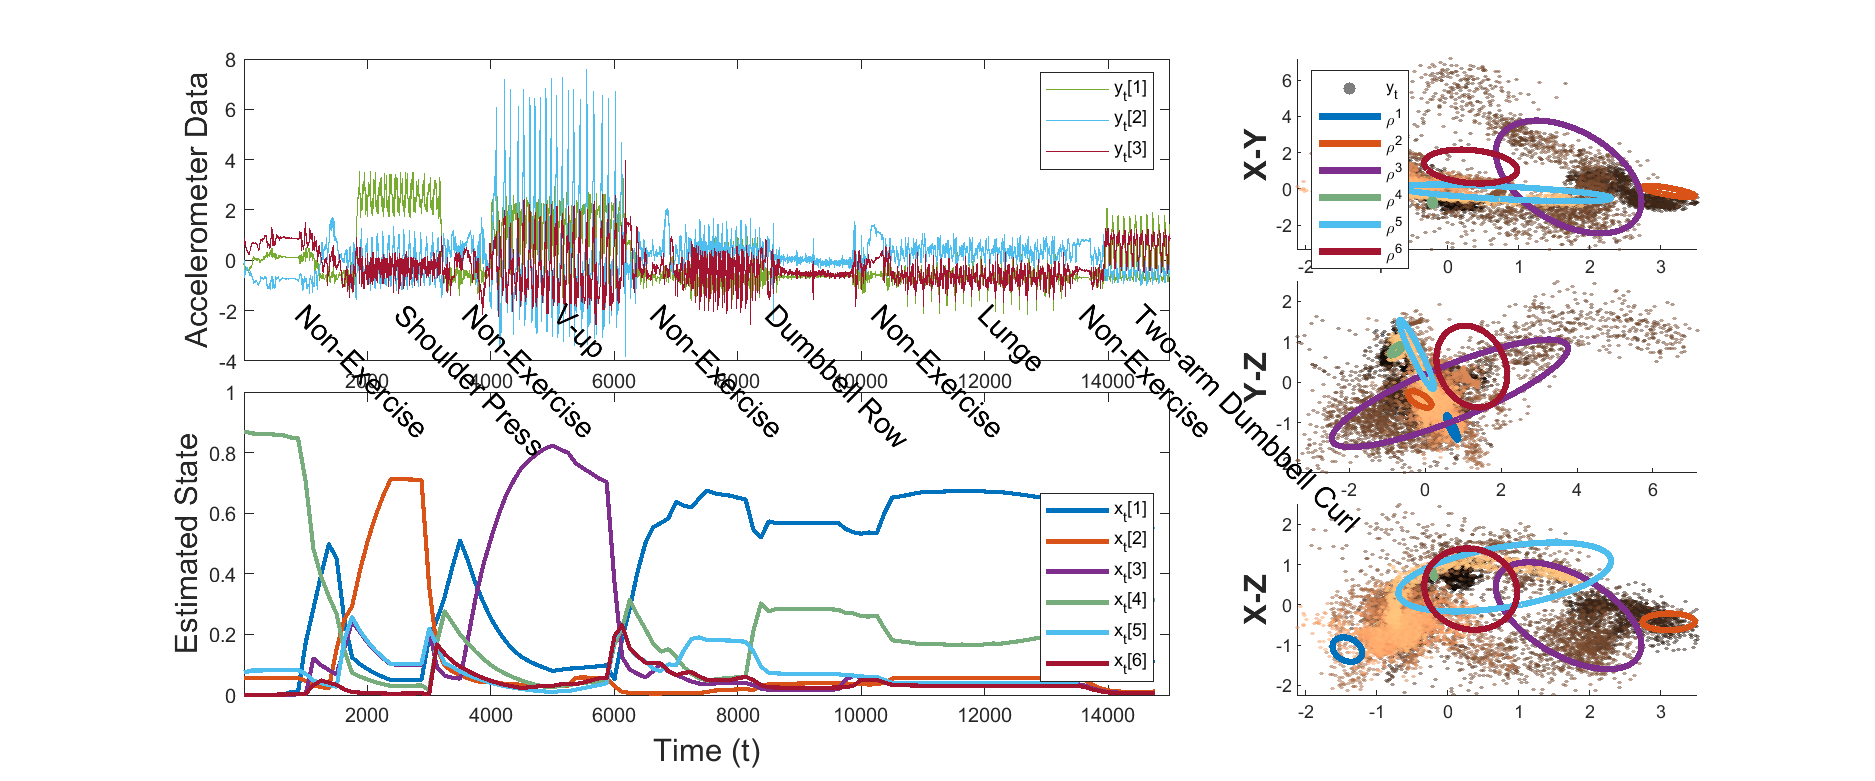

Supplement: Supplementary file 1 [file ebb71045453f38676c40deb9864f811d-Supplemental.zip › Supplement/MSR_Plots/subj031_1.png]

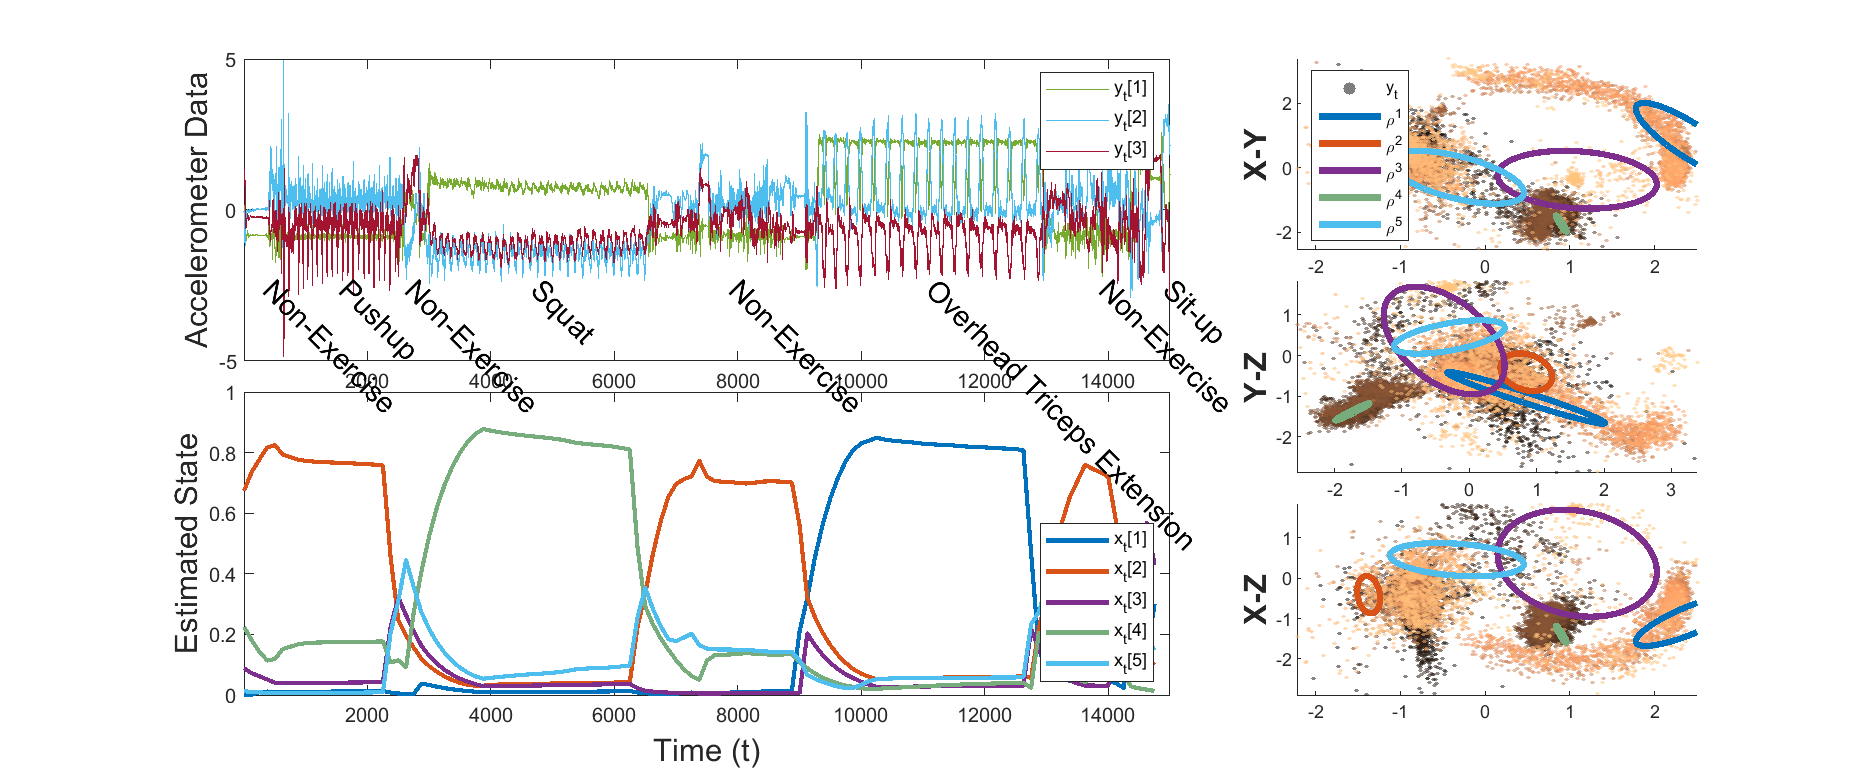

Supplement: Supplementary file 1 [file ebb71045453f38676c40deb9864f811d-Supplemental.zip › Supplement/MSR_Plots/subj032_1.png]

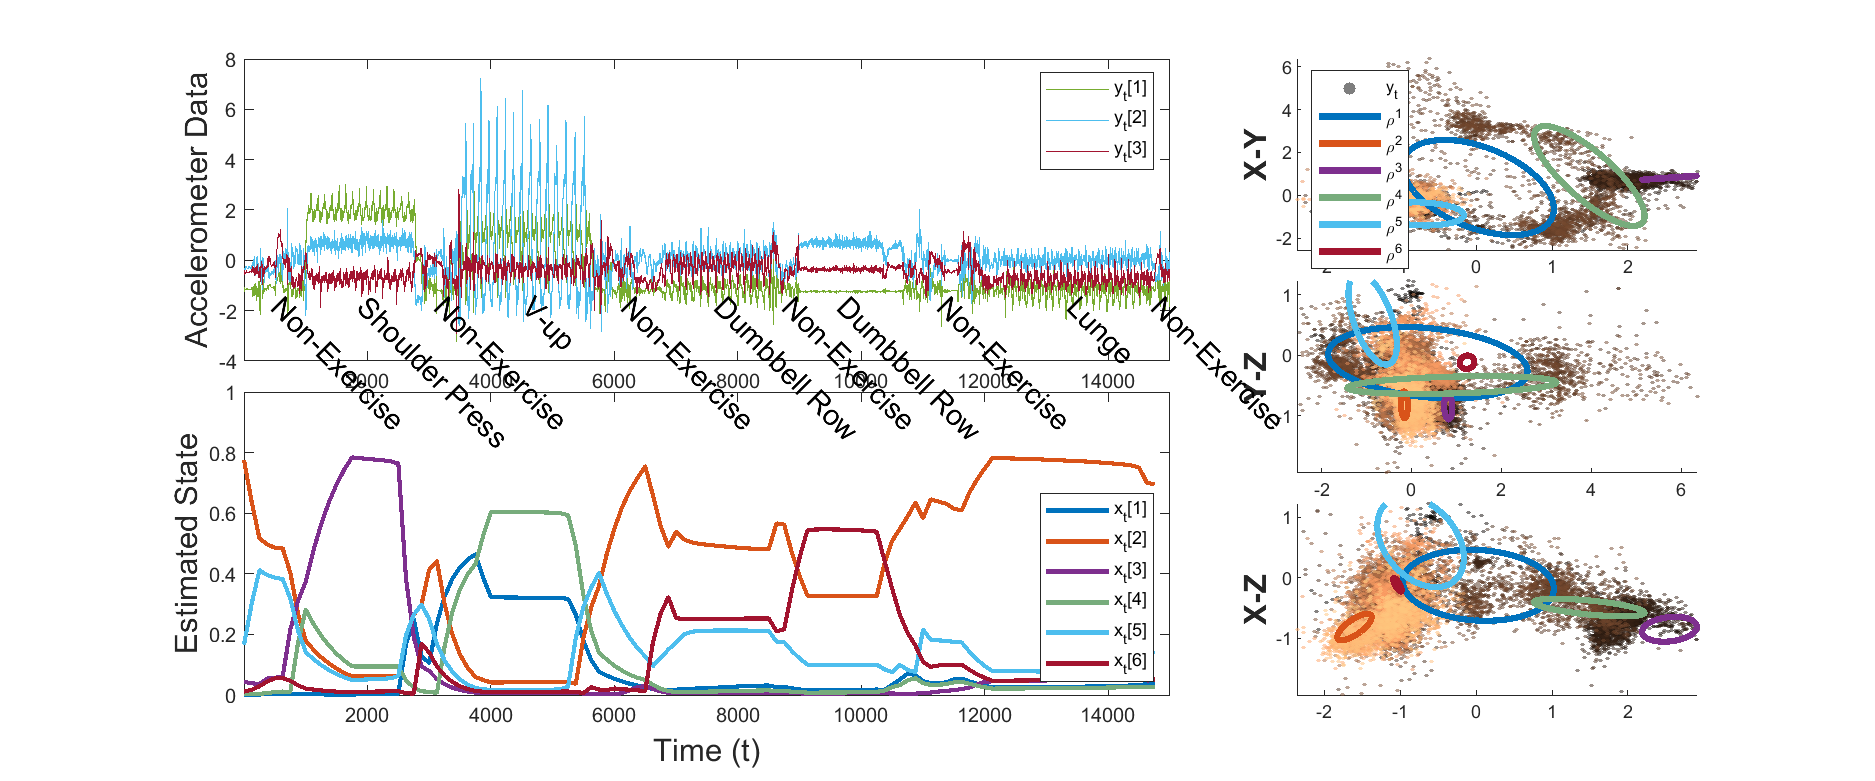

Supplement: Supplementary file 1 [file ebb71045453f38676c40deb9864f811d-Supplemental.zip › Supplement/MSR_Plots/subj033_1.png]

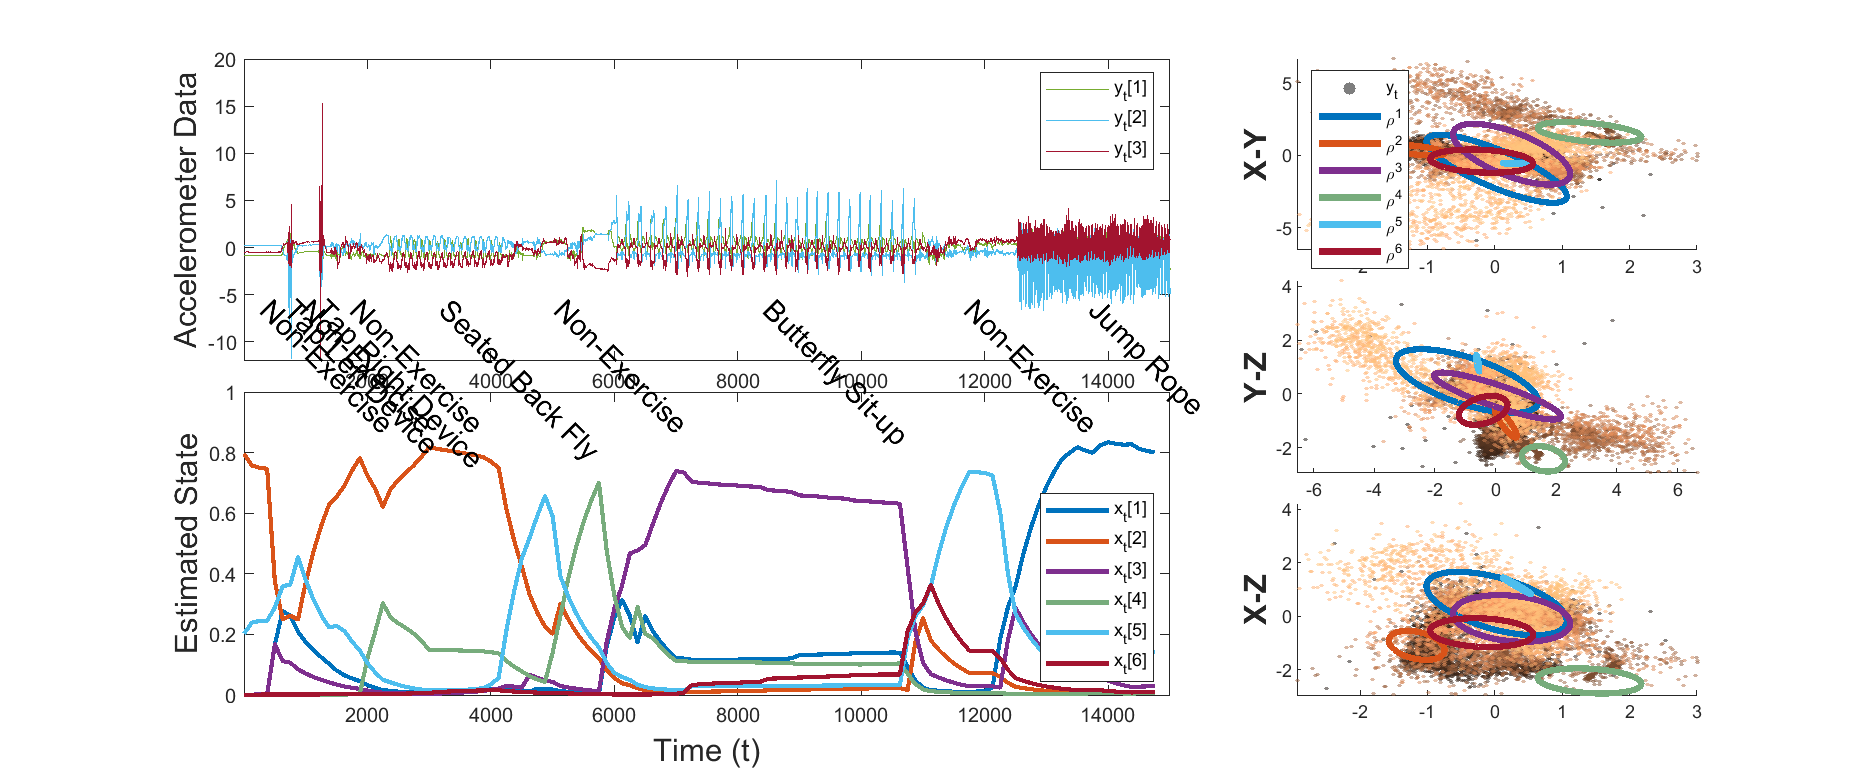

Supplement: Supplementary file 1 [file ebb71045453f38676c40deb9864f811d-Supplemental.zip › Supplement/MSR_Plots/subj033_2.png]

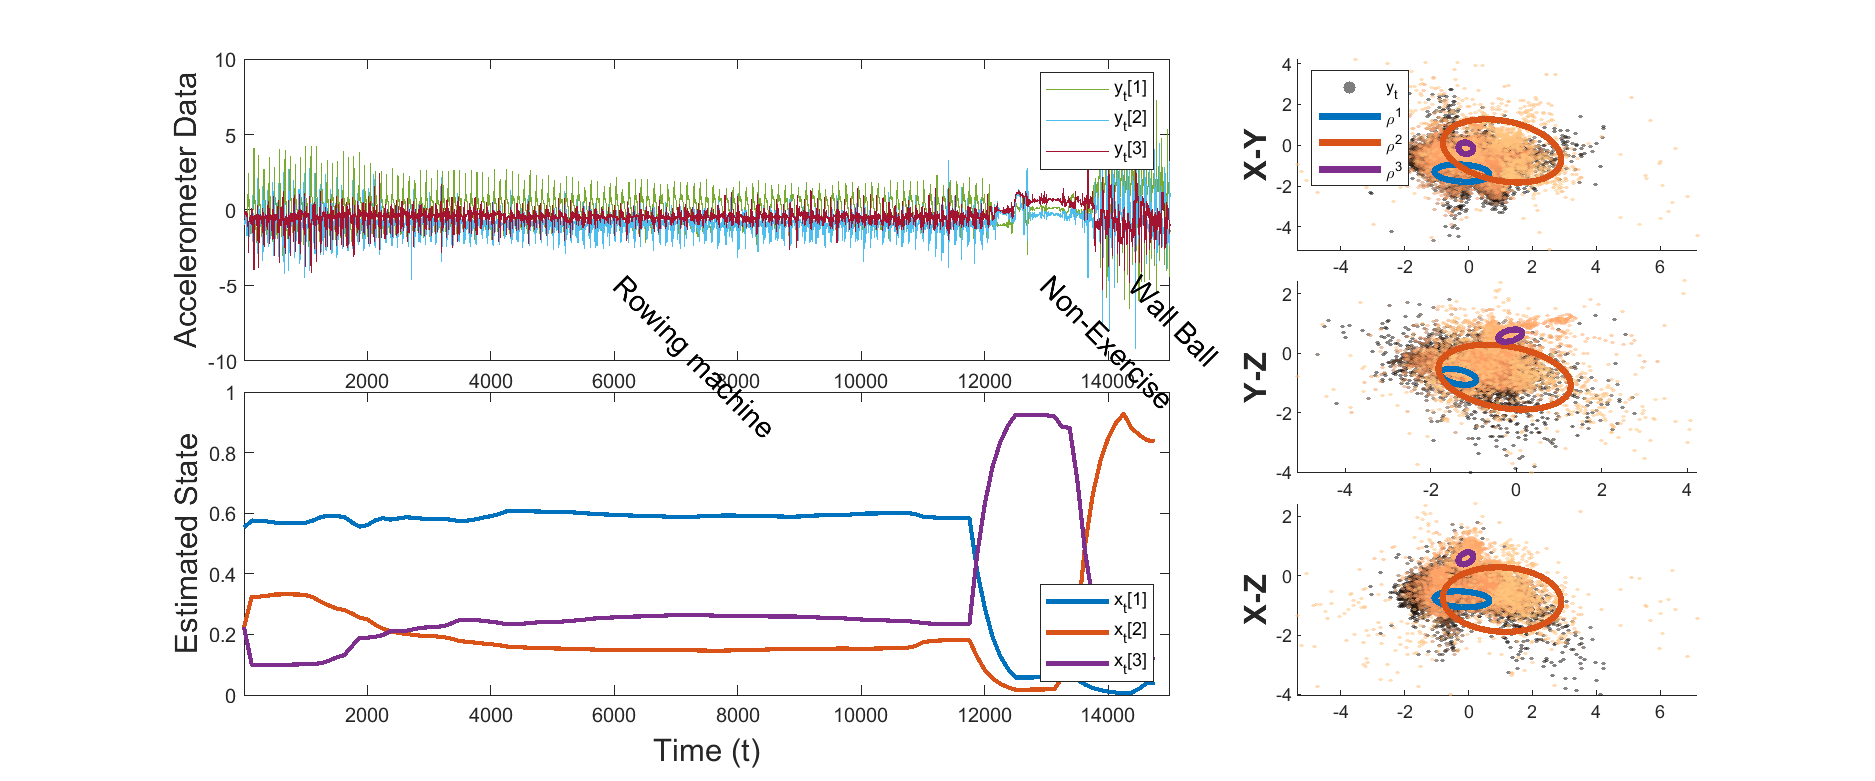

Supplement: Supplementary file 1 [file ebb71045453f38676c40deb9864f811d-Supplemental.zip › Supplement/MSR_Plots/subj033_3.png]

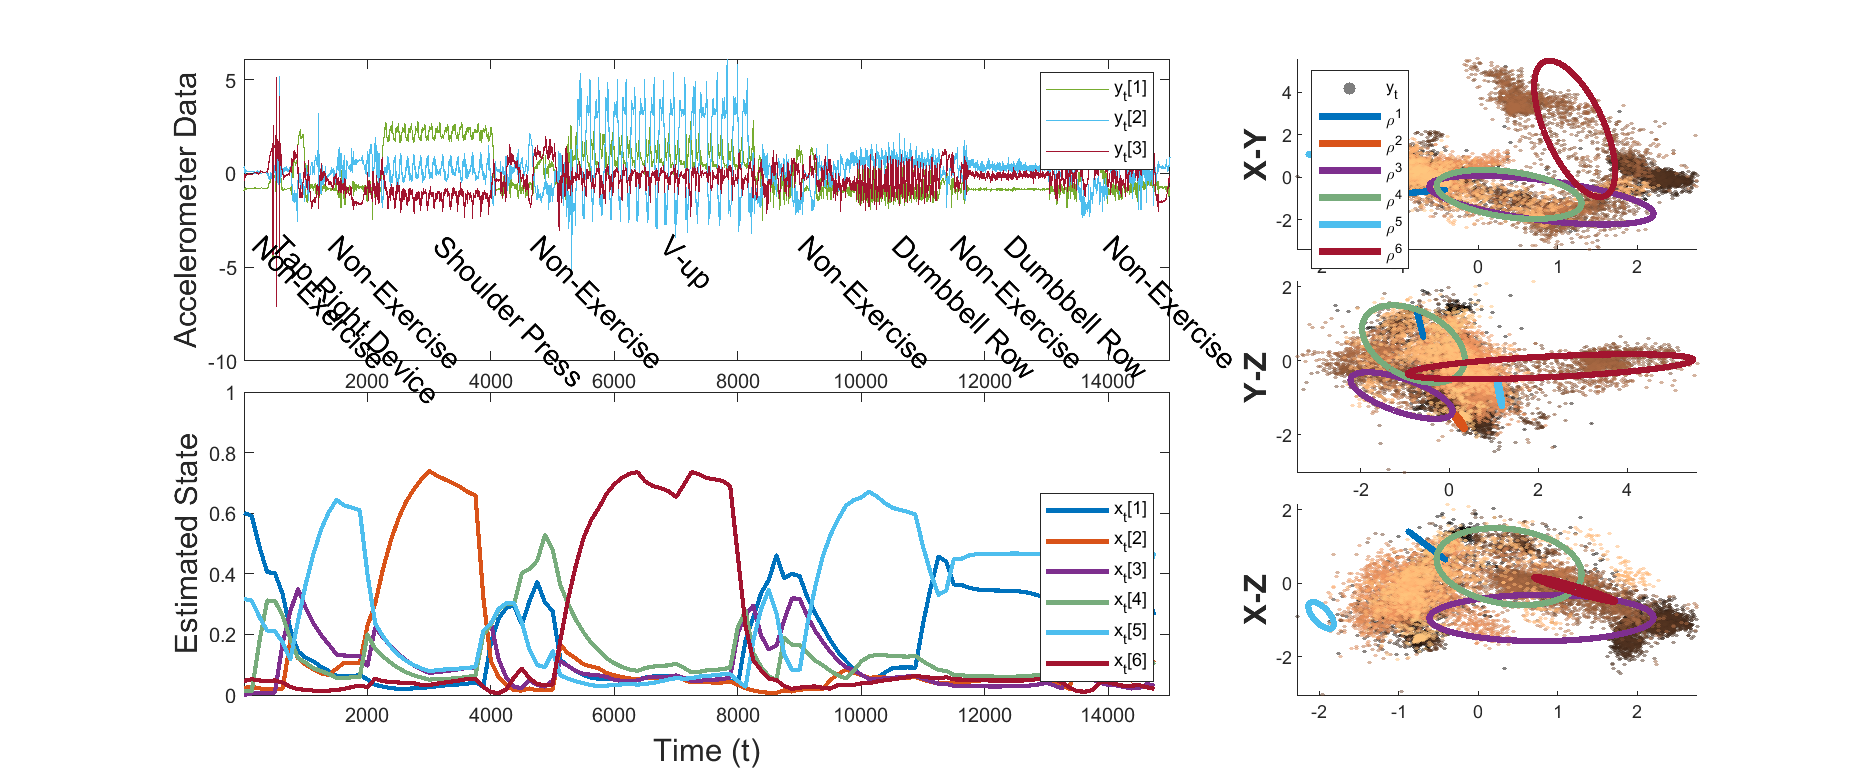

Supplement: Supplementary file 1 [file ebb71045453f38676c40deb9864f811d-Supplemental.zip › Supplement/MSR_Plots/subj034_1.png]

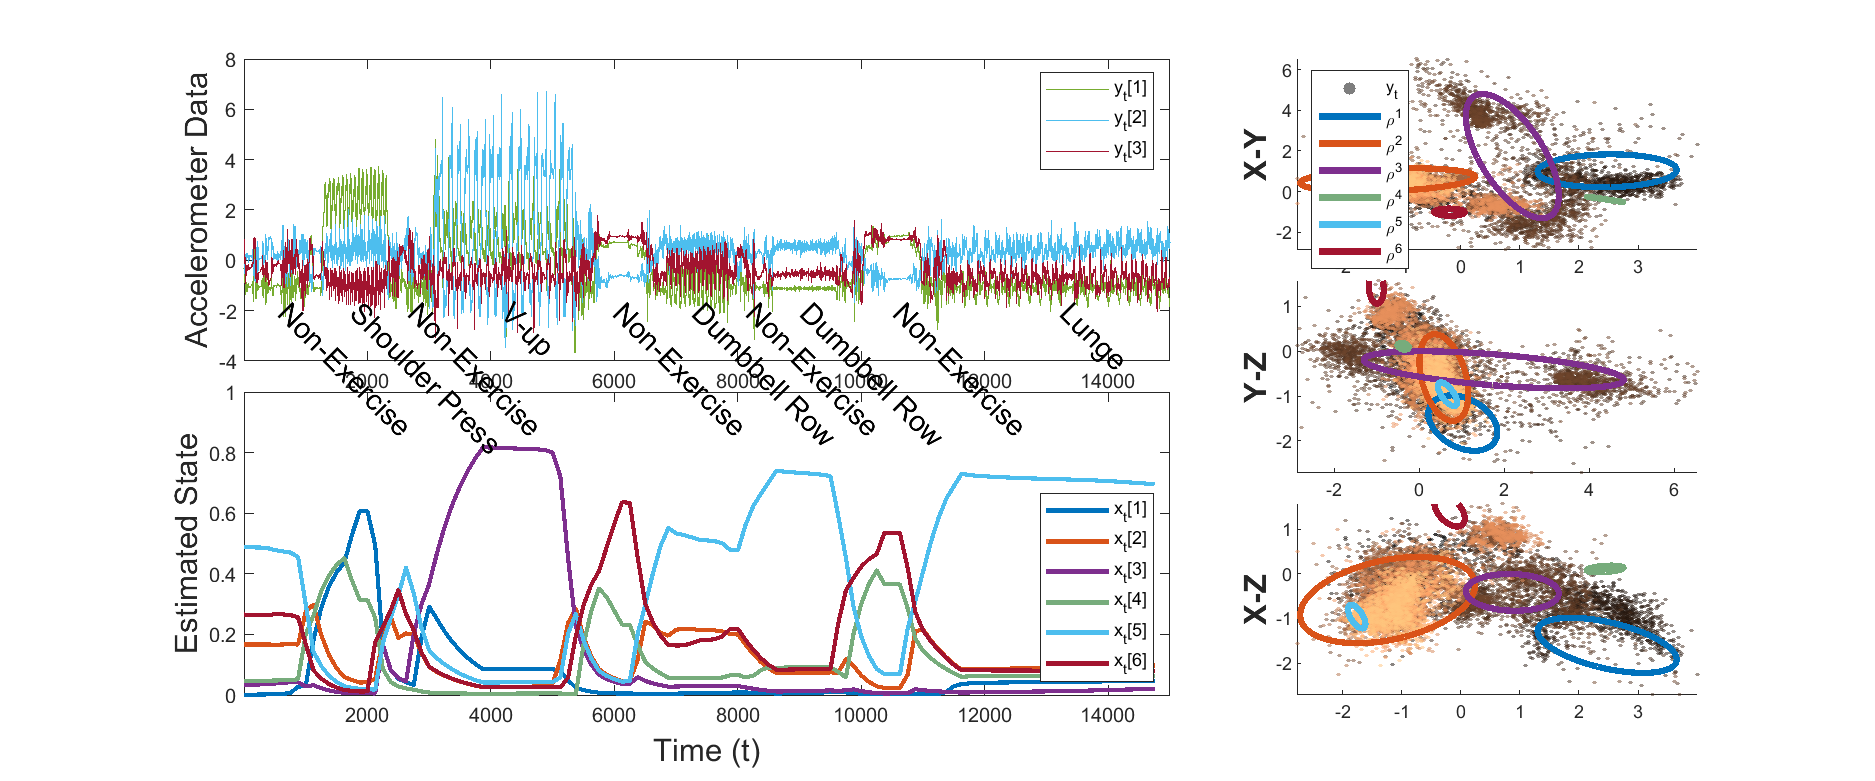

Supplement: Supplementary file 1 [file ebb71045453f38676c40deb9864f811d-Supplemental.zip › Supplement/MSR_Plots/subj035_1.png]

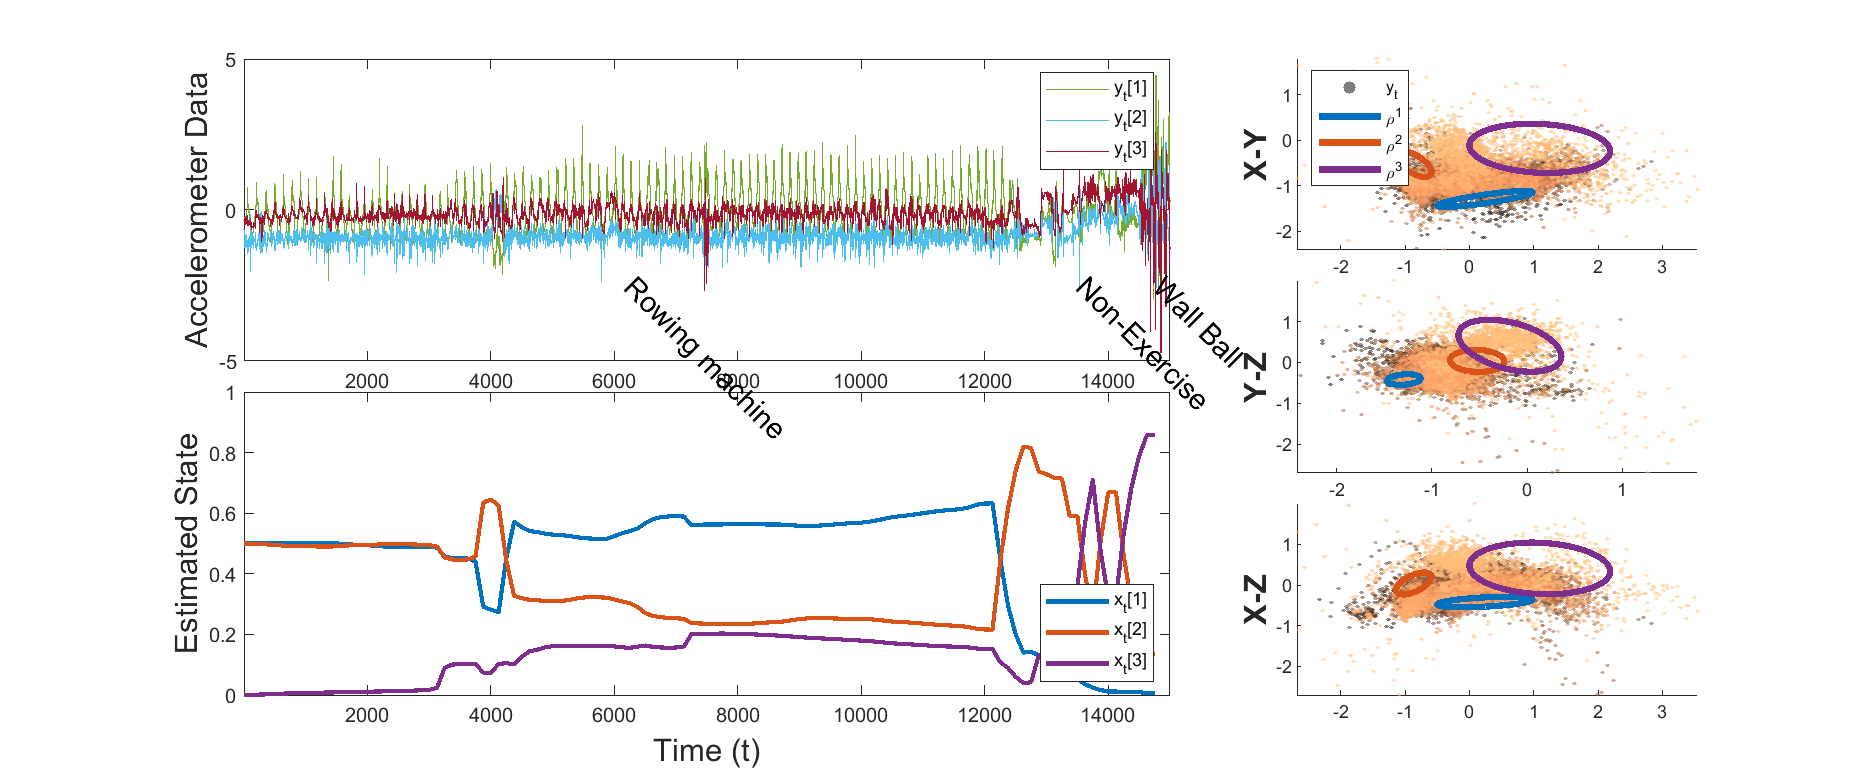

Supplement: Supplementary file 1 [file ebb71045453f38676c40deb9864f811d-Supplemental.zip › Supplement/MSR_Plots/subj035_2.png]

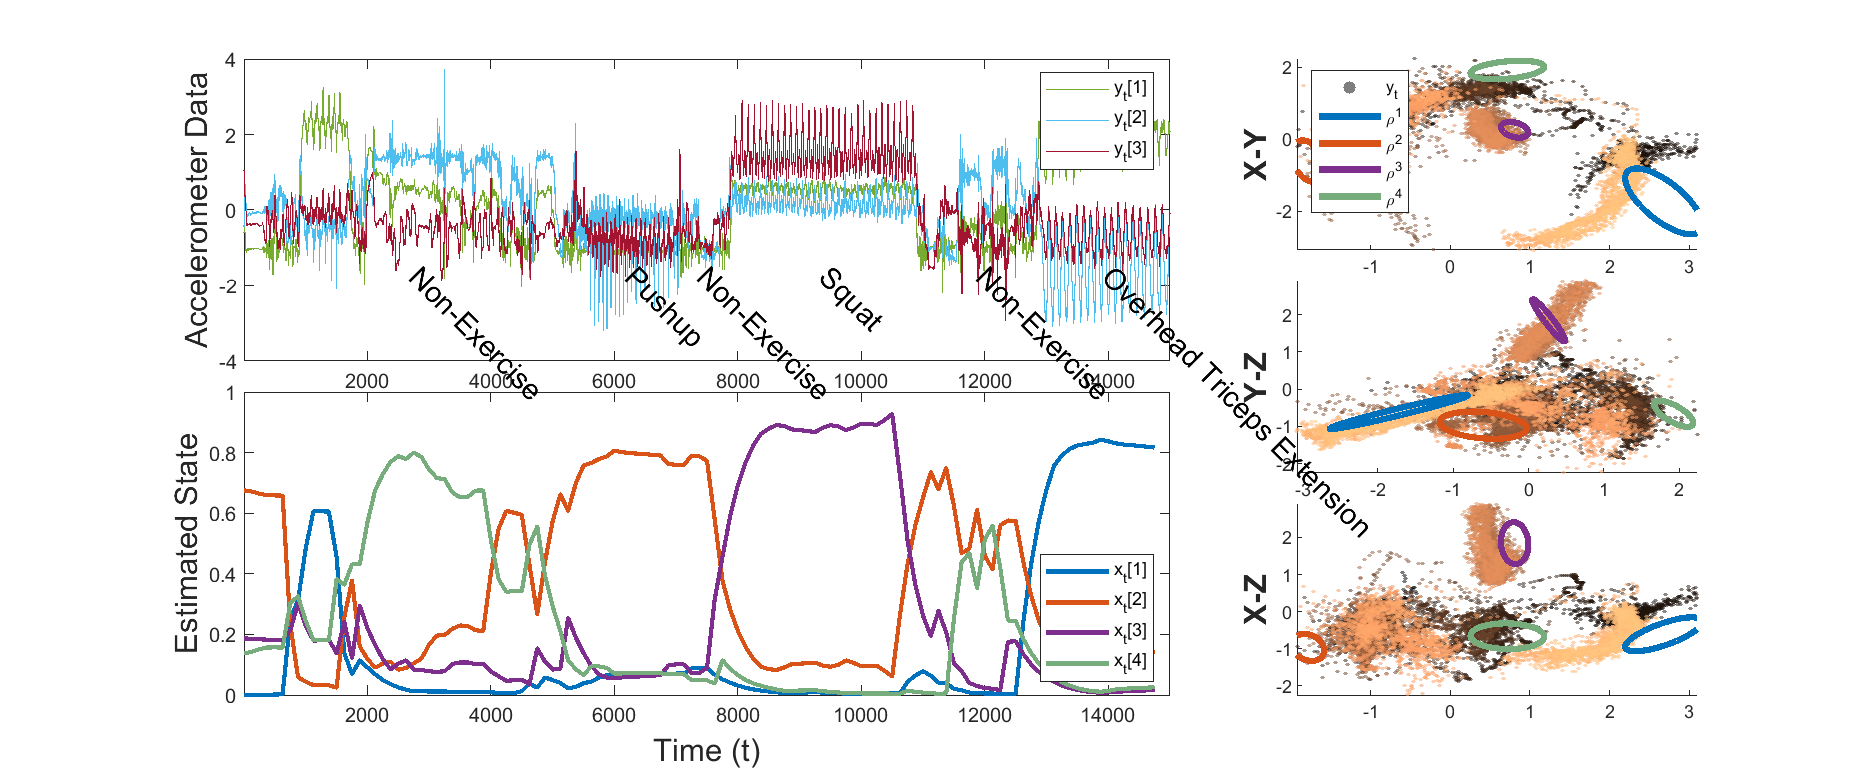

Supplement: Supplementary file 1 [file ebb71045453f38676c40deb9864f811d-Supplemental.zip › Supplement/MSR_Plots/subj036_1.png]

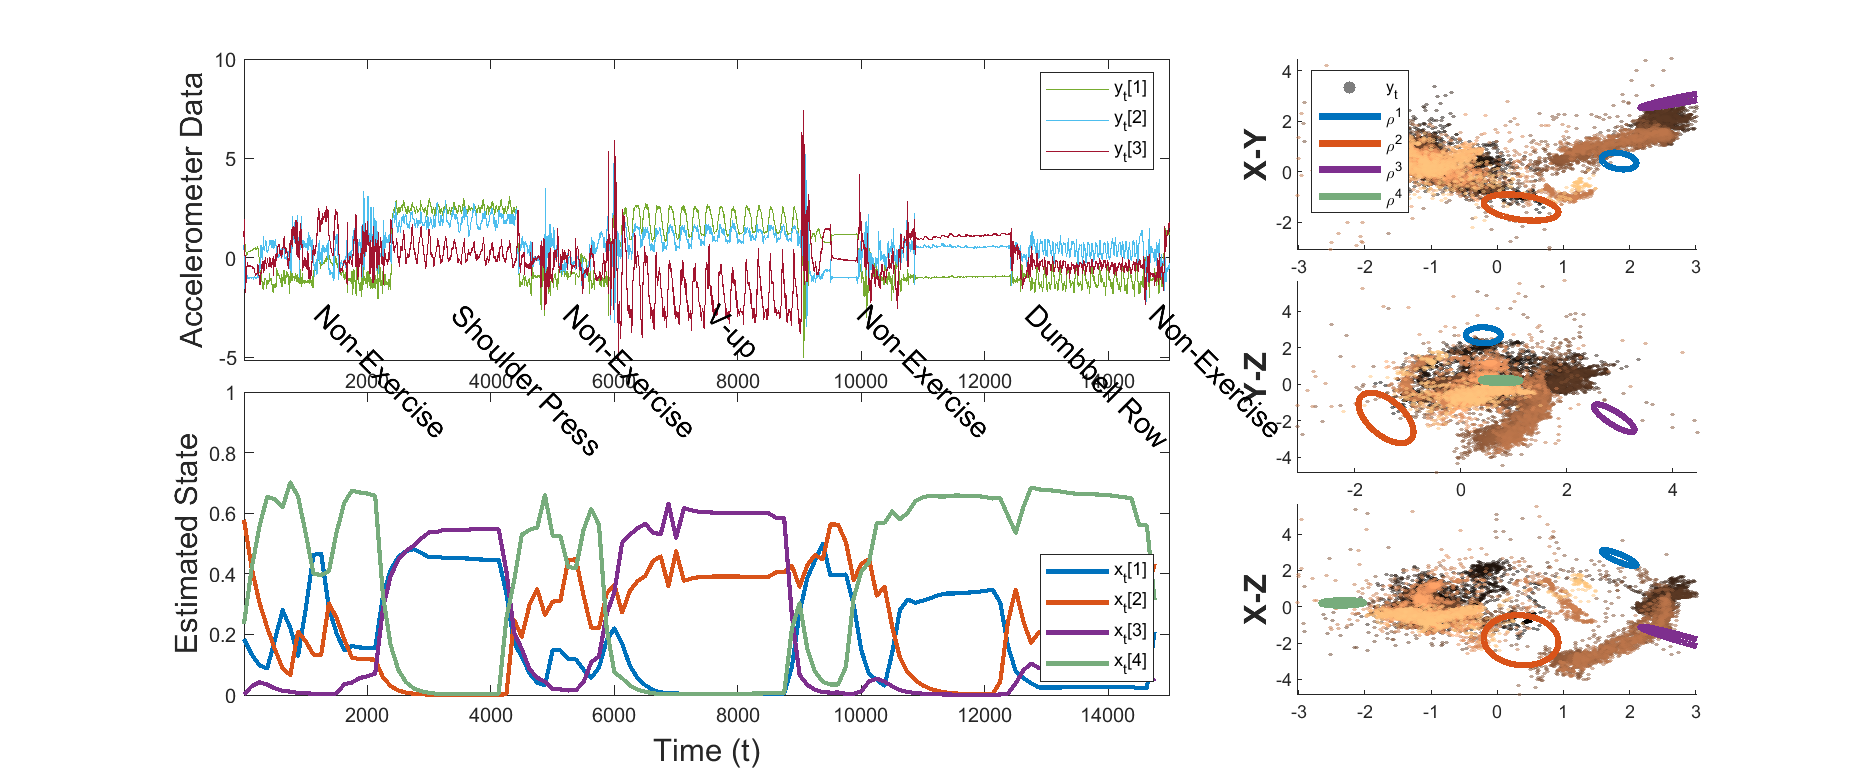

Supplement: Supplementary file 1 [file ebb71045453f38676c40deb9864f811d-Supplemental.zip › Supplement/MSR_Plots/subj037_1.png]

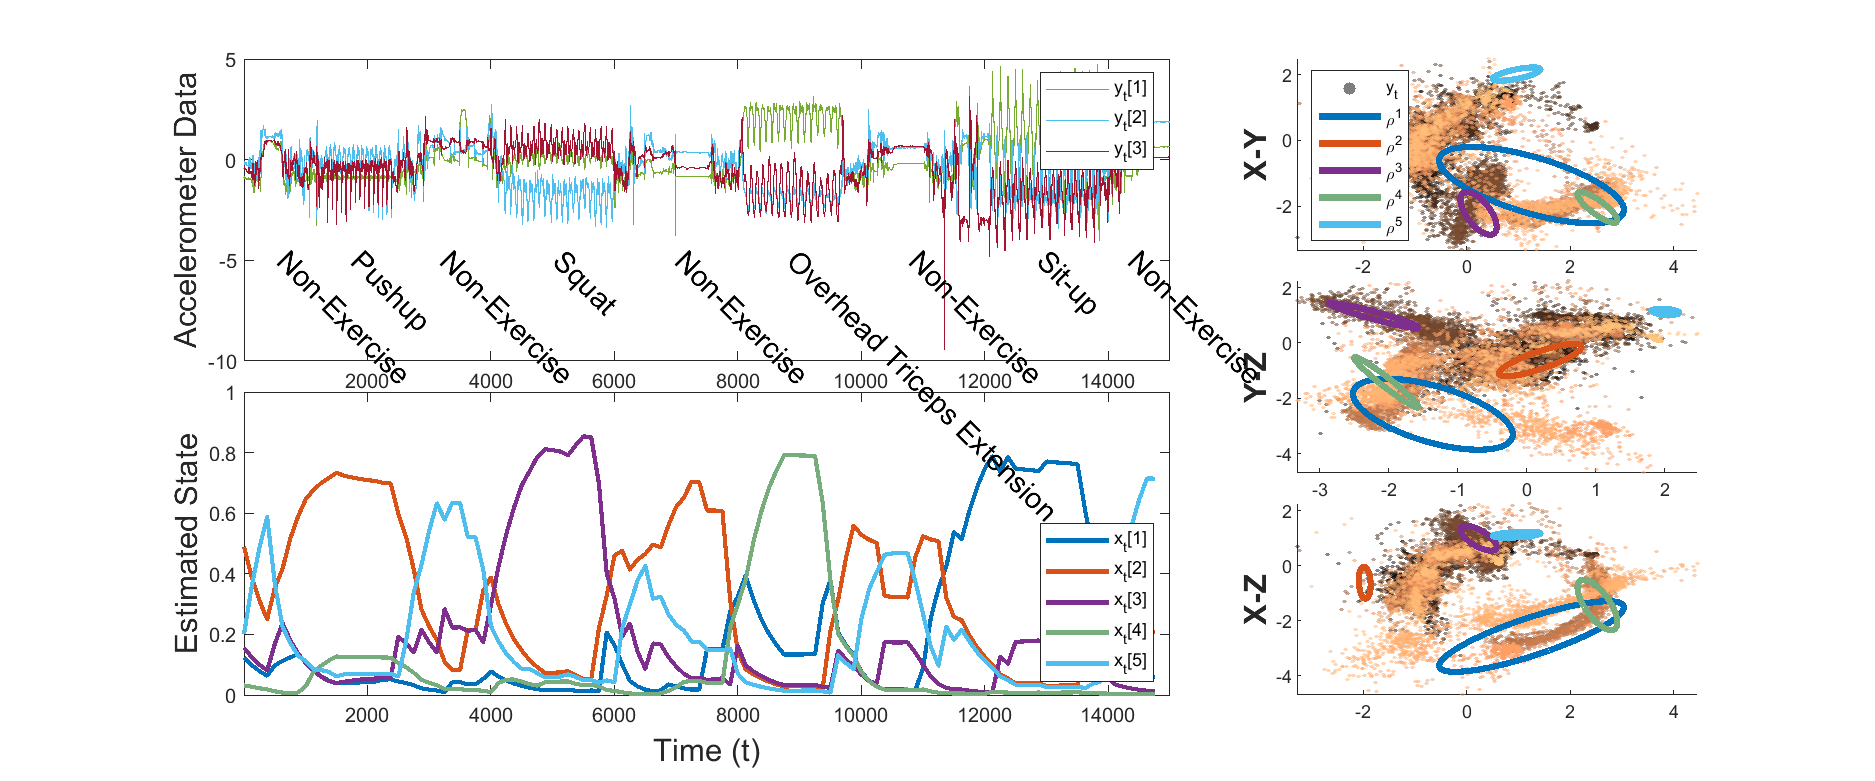

Supplement: Supplementary file 1 [file ebb71045453f38676c40deb9864f811d-Supplemental.zip › Supplement/MSR_Plots/subj038_1.png]

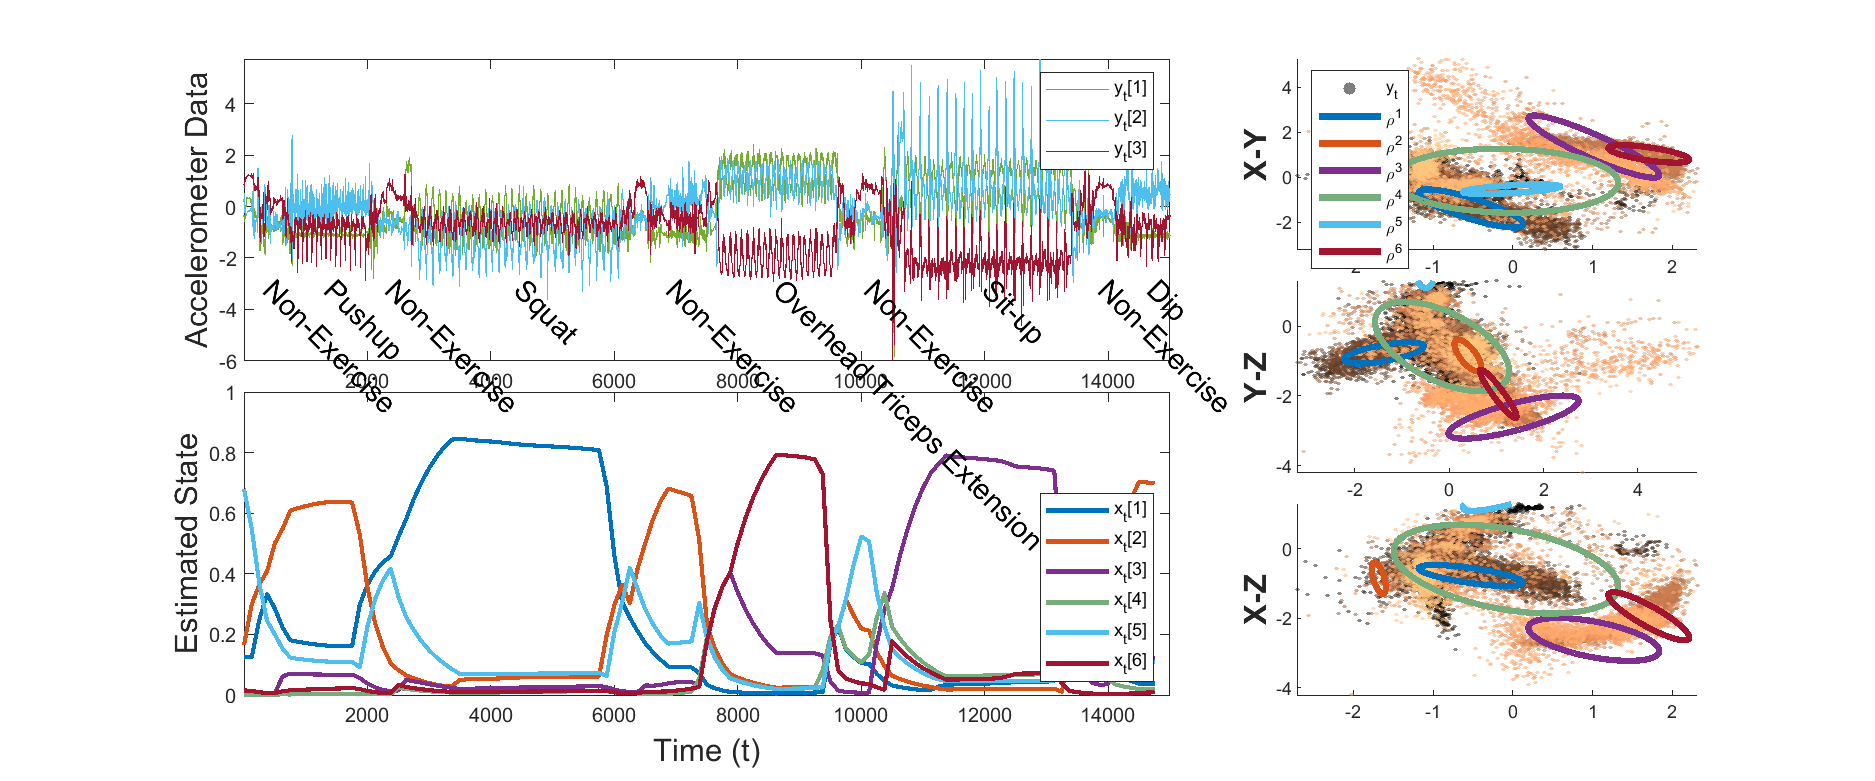

Supplement: Supplementary file 1 [file ebb71045453f38676c40deb9864f811d-Supplemental.zip › Supplement/MSR_Plots/subj039_1.png]

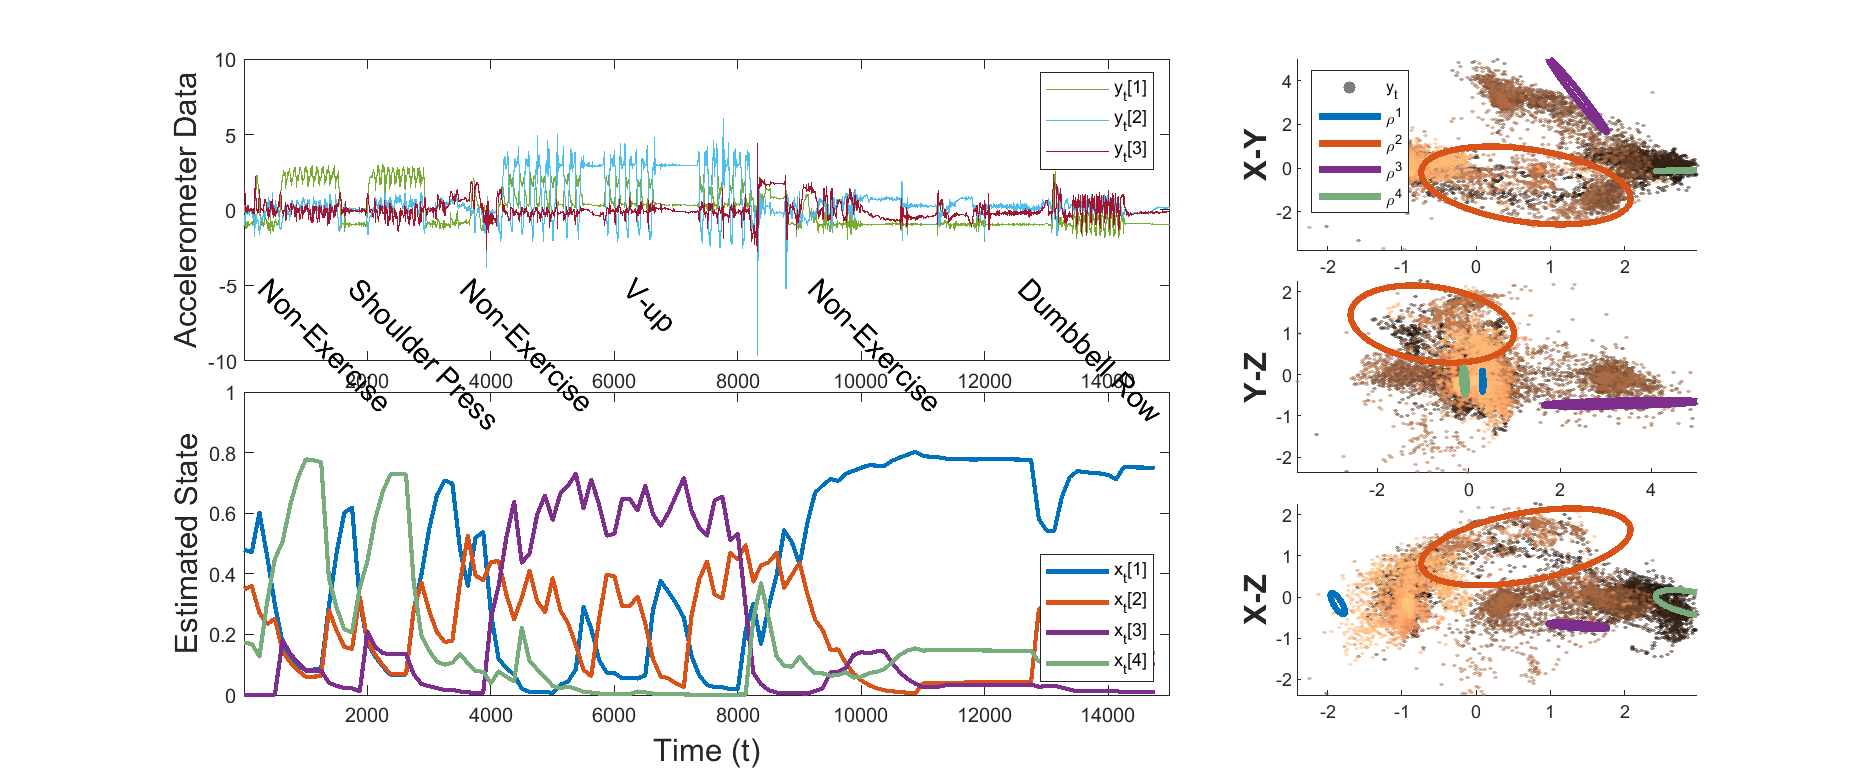

Supplement: Supplementary file 1 [file ebb71045453f38676c40deb9864f811d-Supplemental.zip › Supplement/MSR_Plots/subj040_1.png]

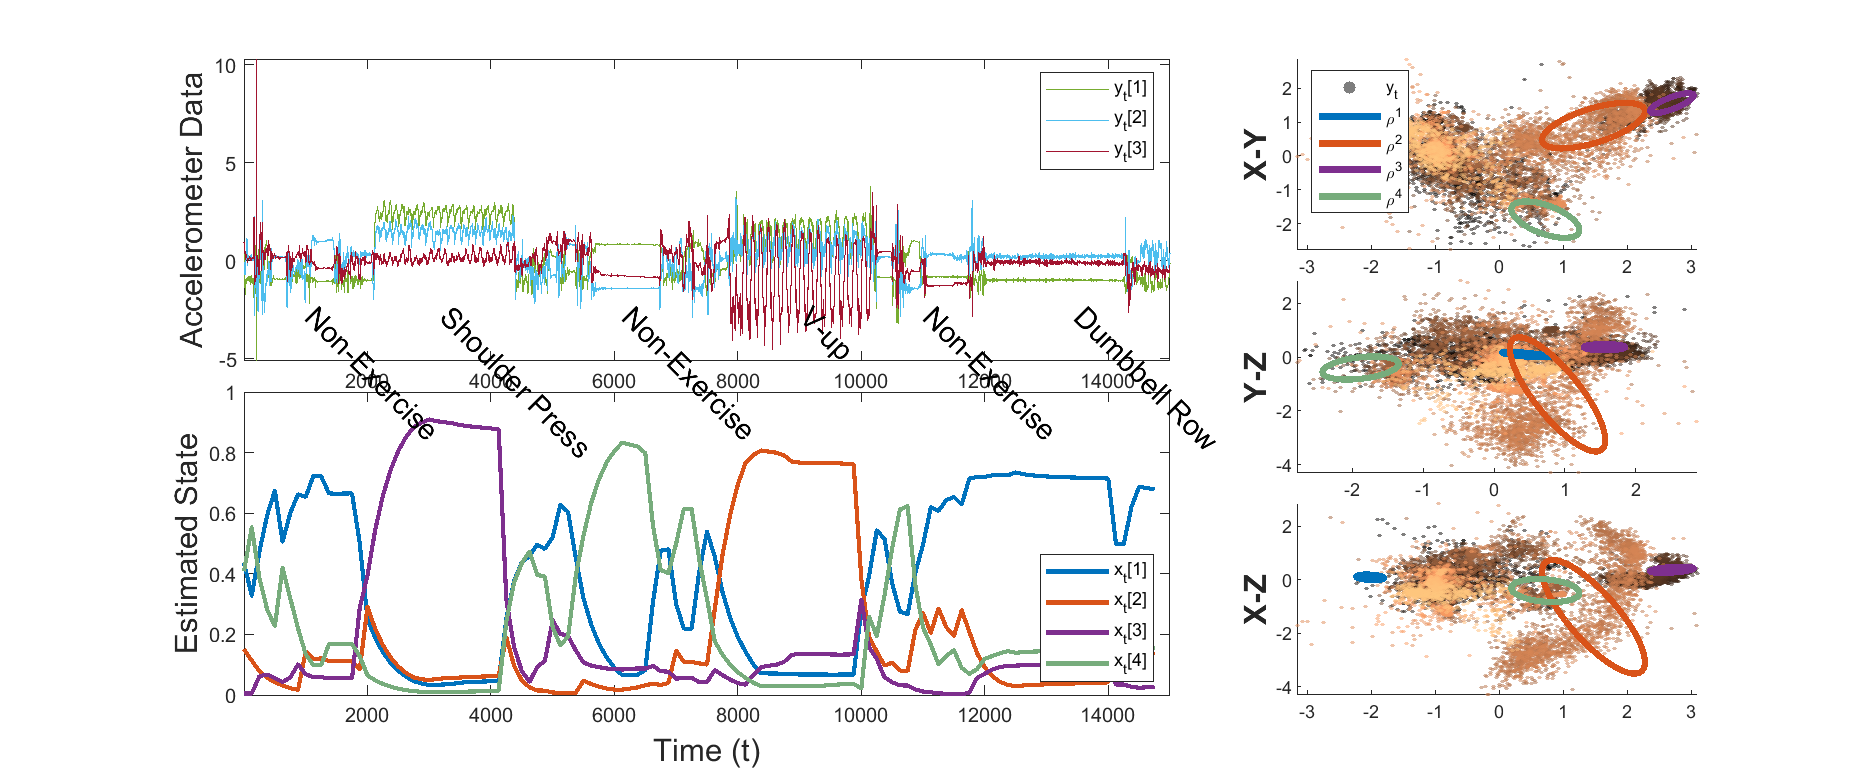

Supplement: Supplementary file 1 [file ebb71045453f38676c40deb9864f811d-Supplemental.zip › Supplement/MSR_Plots/subj041_1.png]

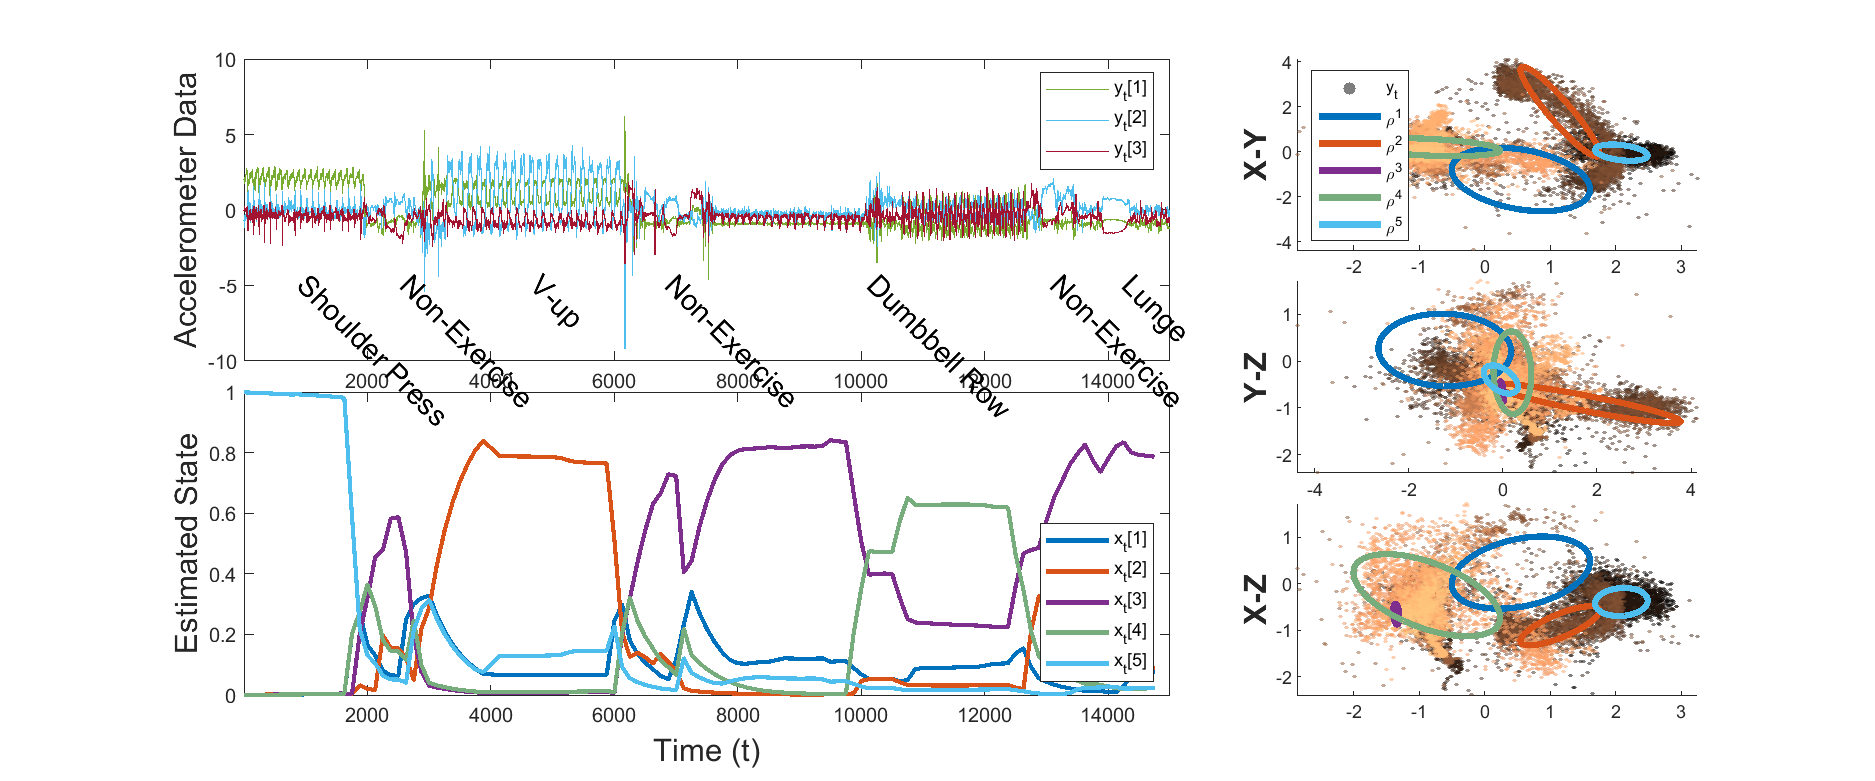

Supplement: Supplementary file 1 [file ebb71045453f38676c40deb9864f811d-Supplemental.zip › Supplement/MSR_Plots/subj042_1.png]

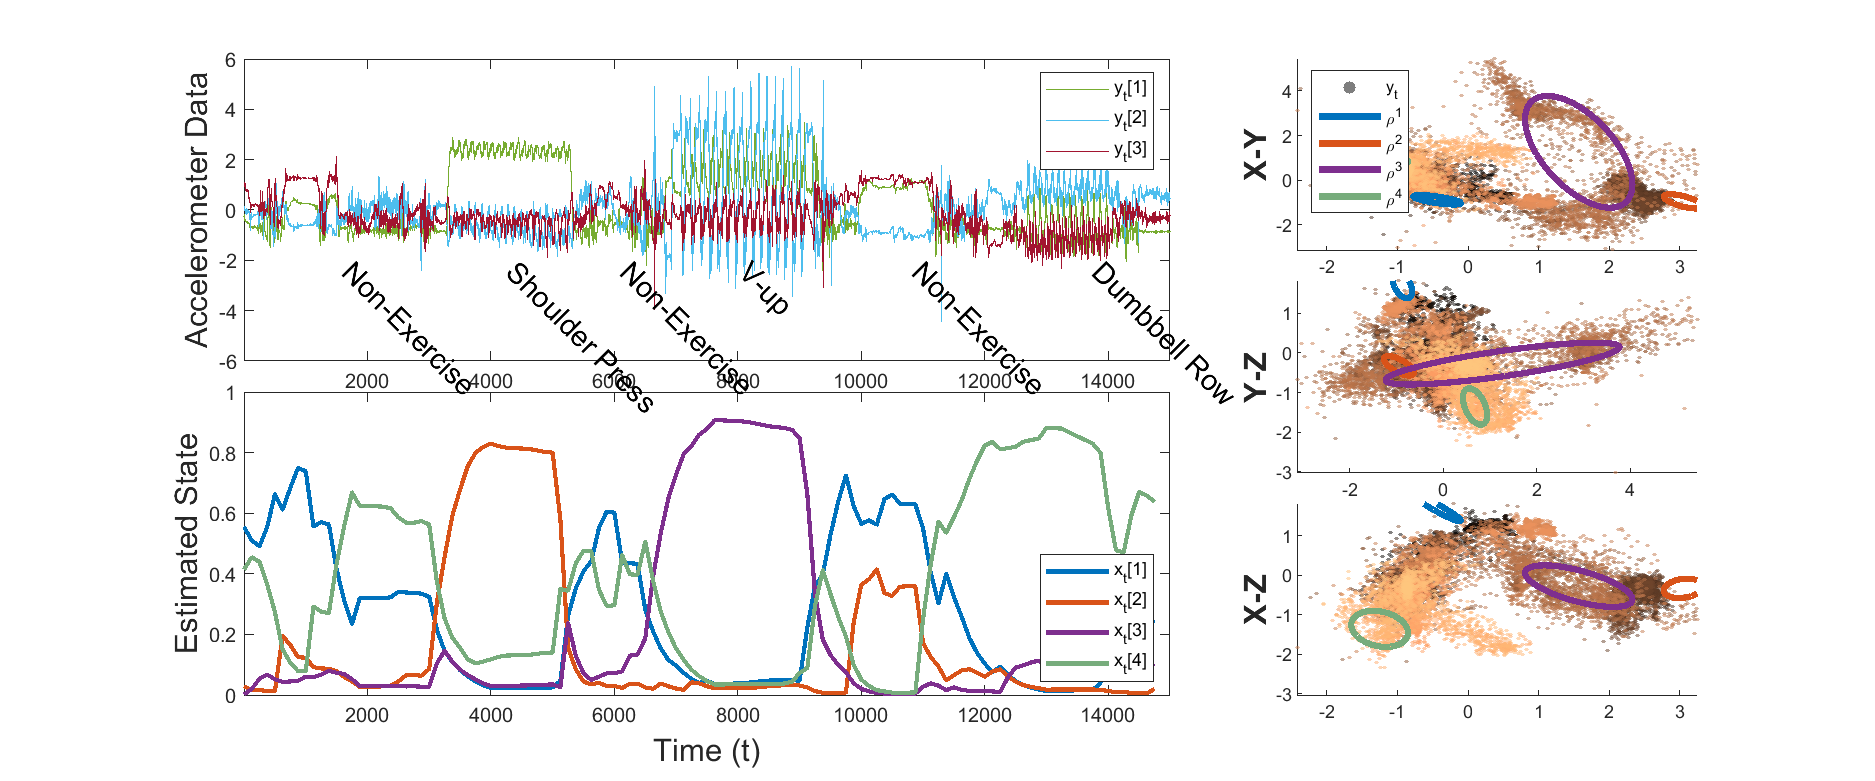

Supplement: Supplementary file 1 [file ebb71045453f38676c40deb9864f811d-Supplemental.zip › Supplement/MSR_Plots/subj043_1.png]

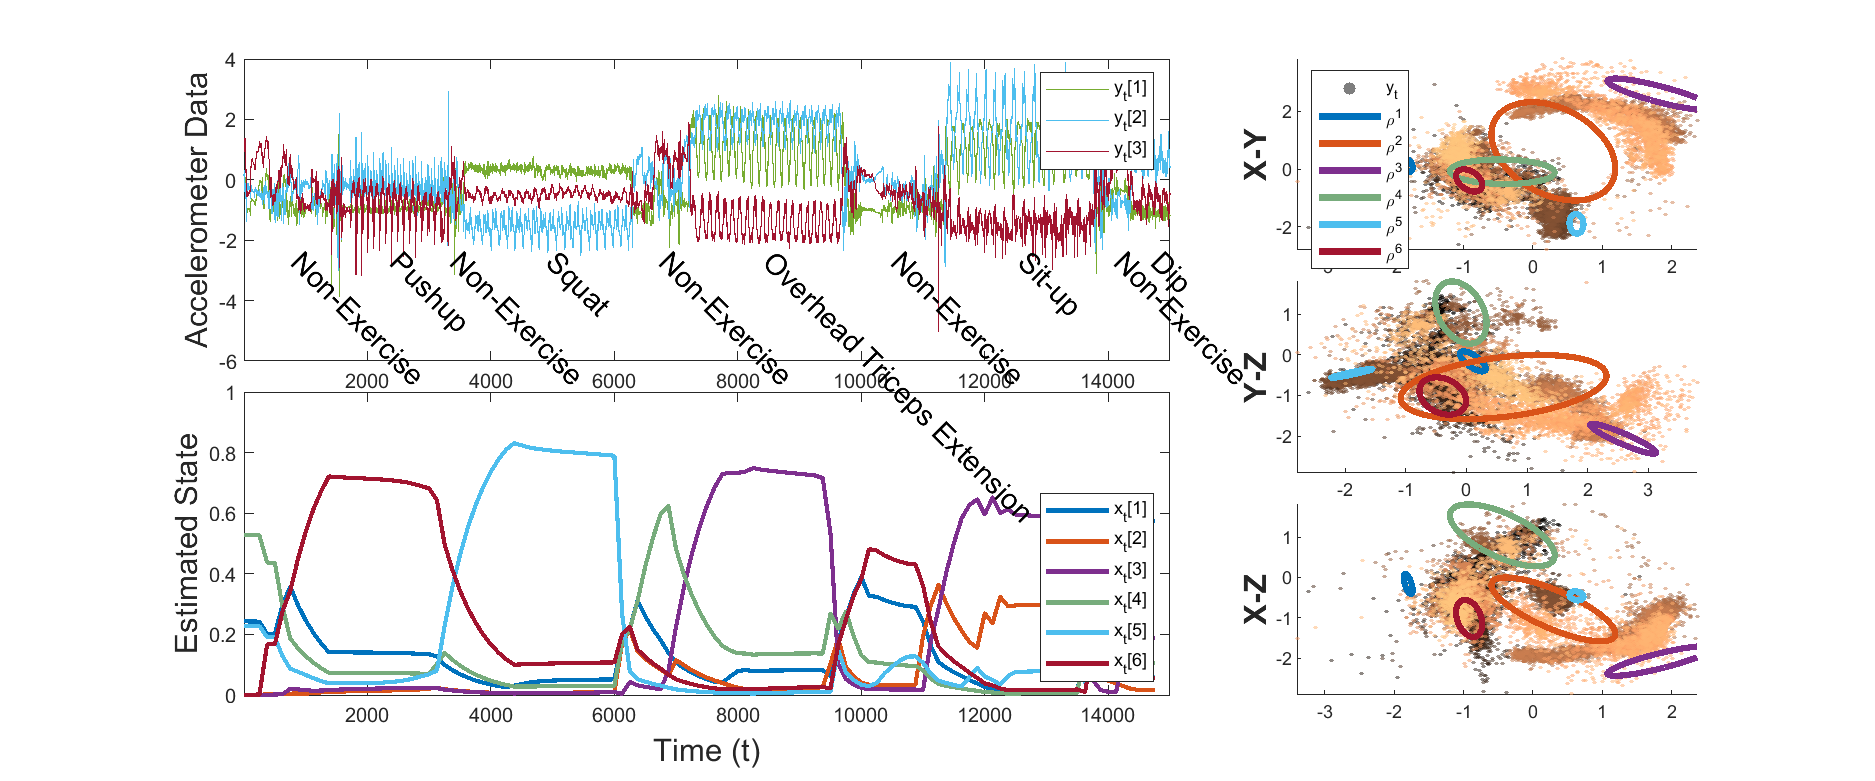

Supplement: Supplementary file 1 [file ebb71045453f38676c40deb9864f811d-Supplemental.zip › Supplement/MSR_Plots/subj044_1.png]

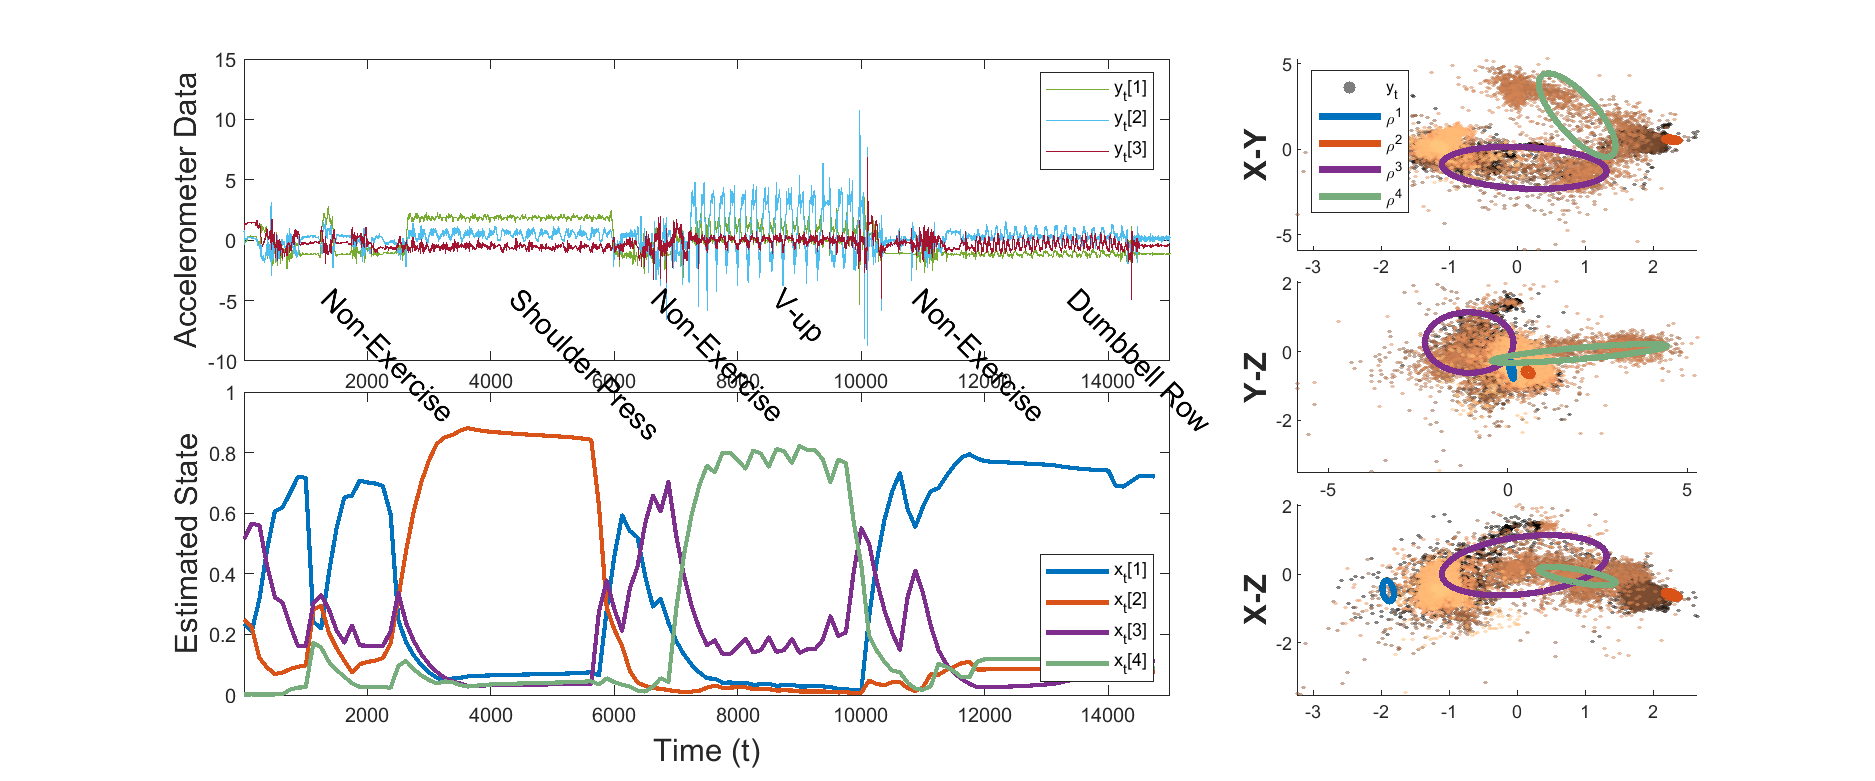

Supplement: Supplementary file 1 [file ebb71045453f38676c40deb9864f811d-Supplemental.zip › Supplement/MSR_Plots/subj045_1.png]

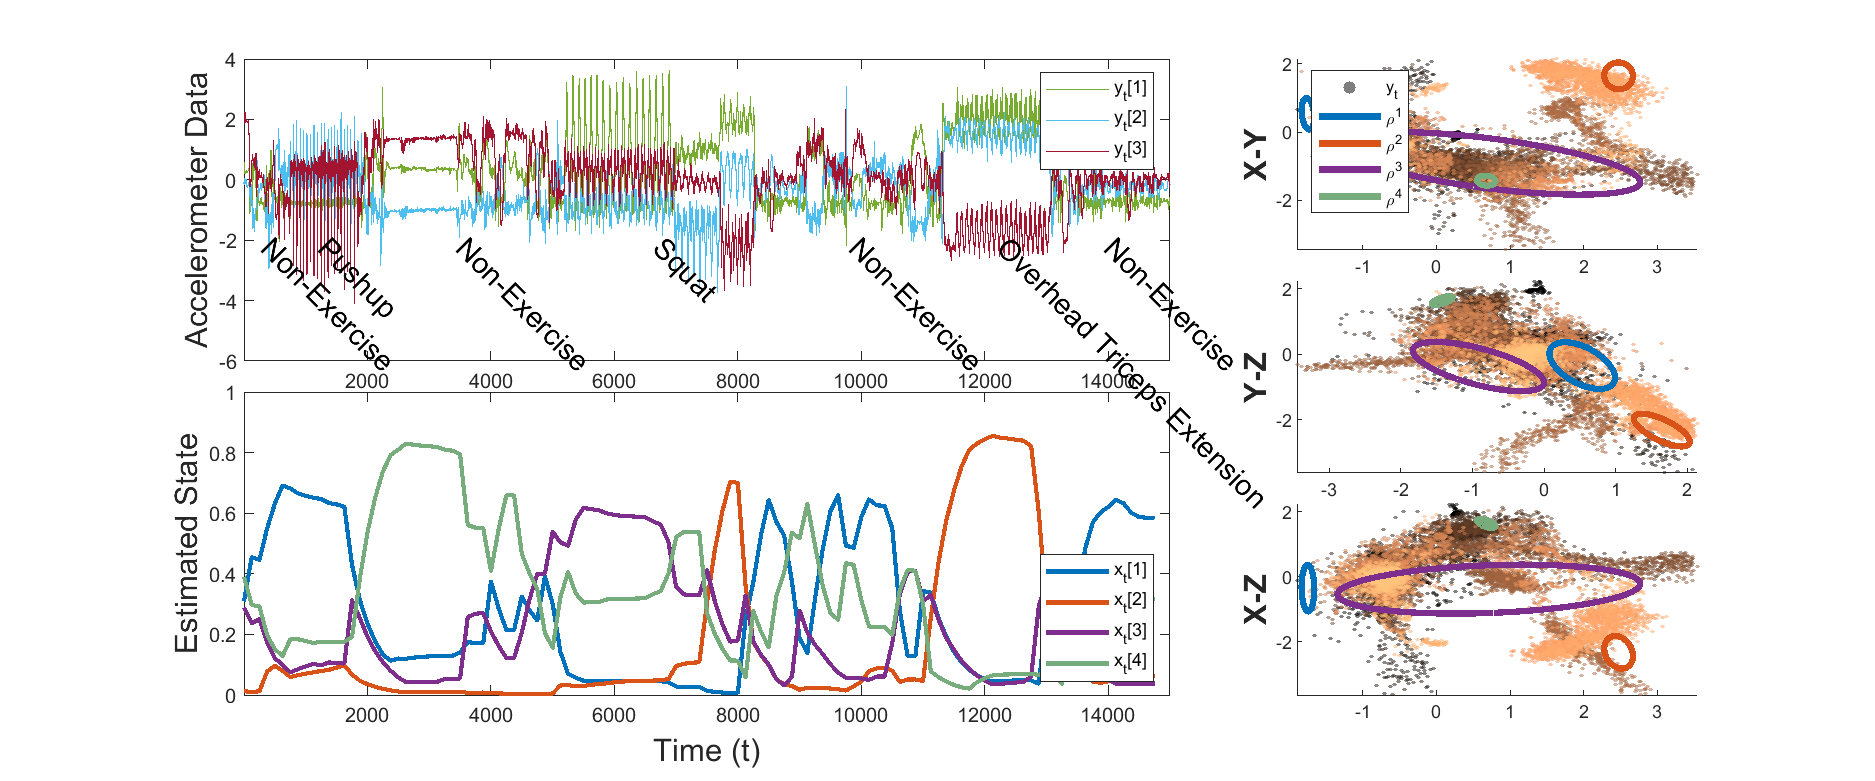

Supplement: Supplementary file 1 [file ebb71045453f38676c40deb9864f811d-Supplemental.zip › Supplement/MSR_Plots/subj046_1.png]

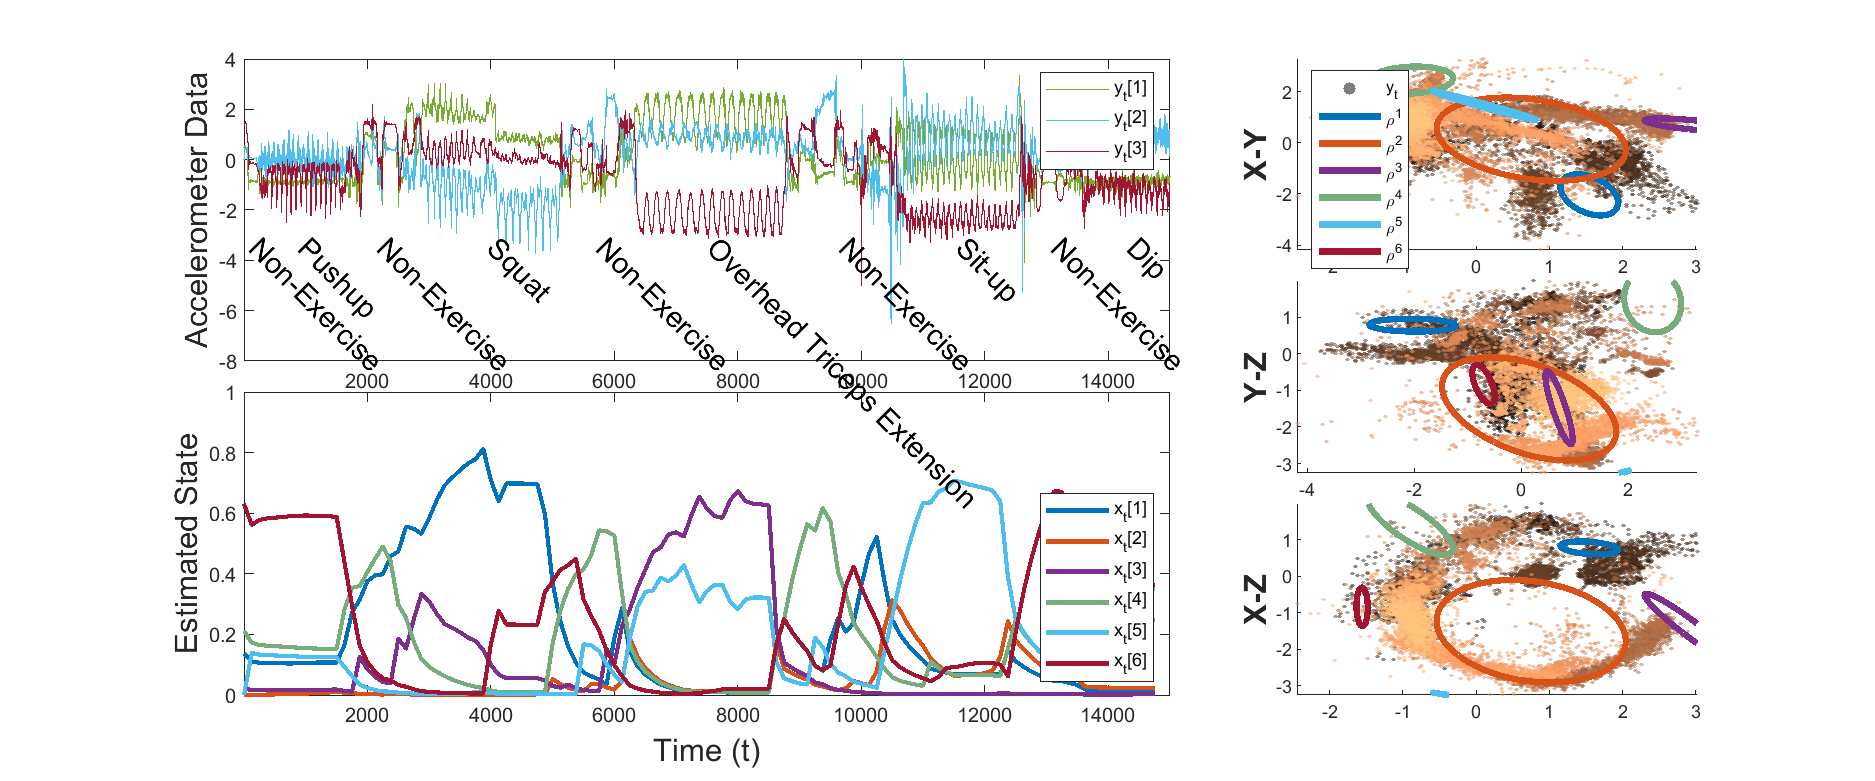

Supplement: Supplementary file 1 [file ebb71045453f38676c40deb9864f811d-Supplemental.zip › Supplement/MSR_Plots/subj047_1.png]

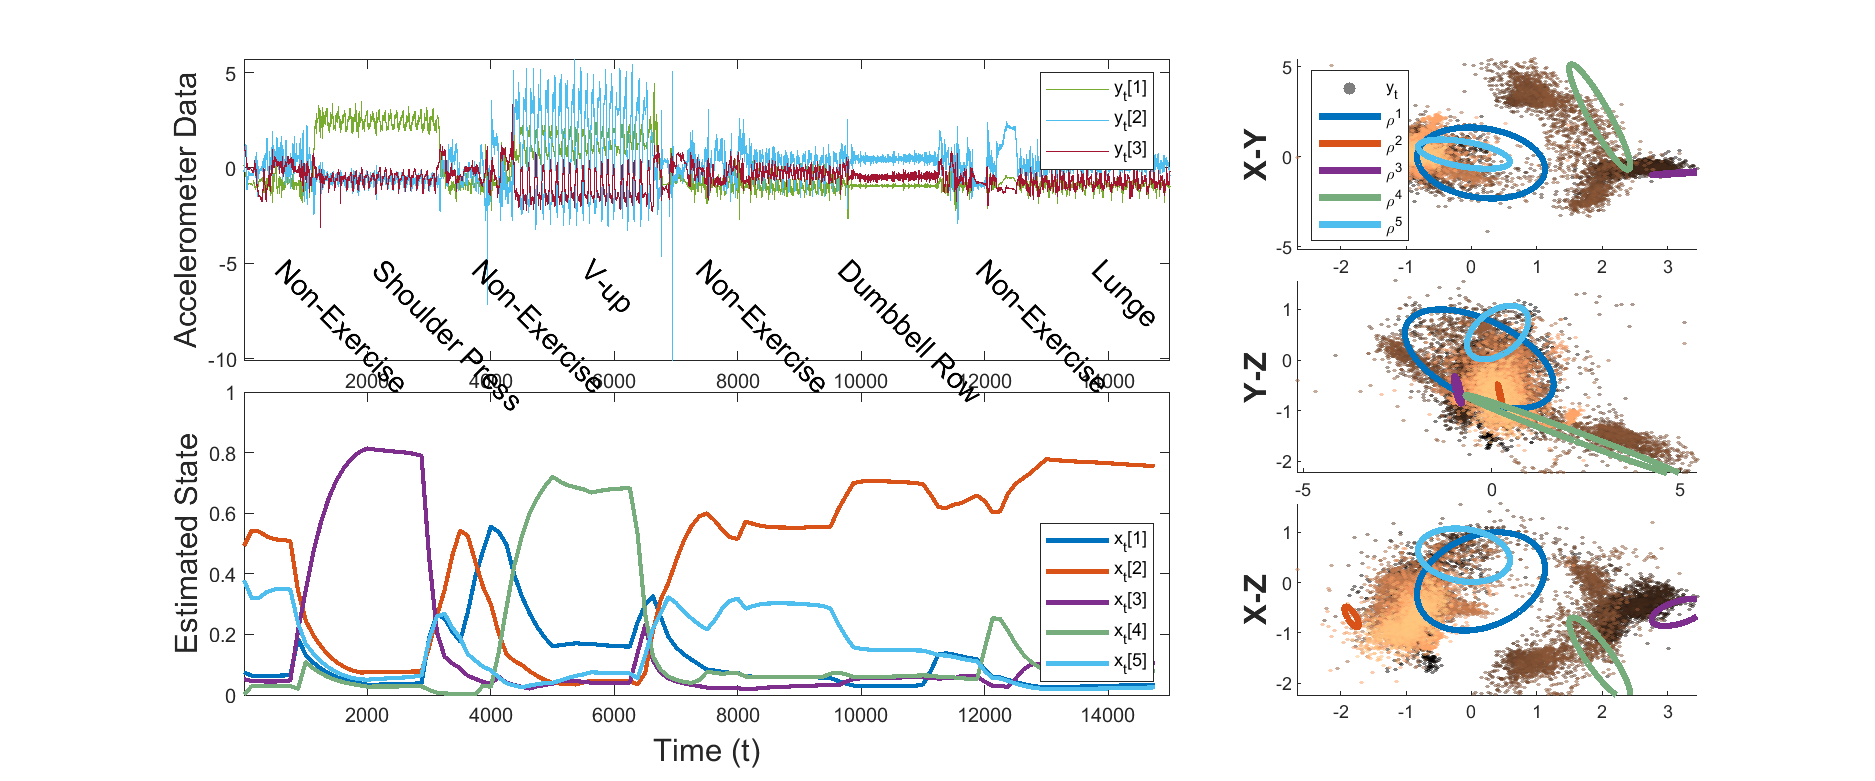

Supplement: Supplementary file 1 [file ebb71045453f38676c40deb9864f811d-Supplemental.zip › Supplement/MSR_Plots/subj048_1.png]

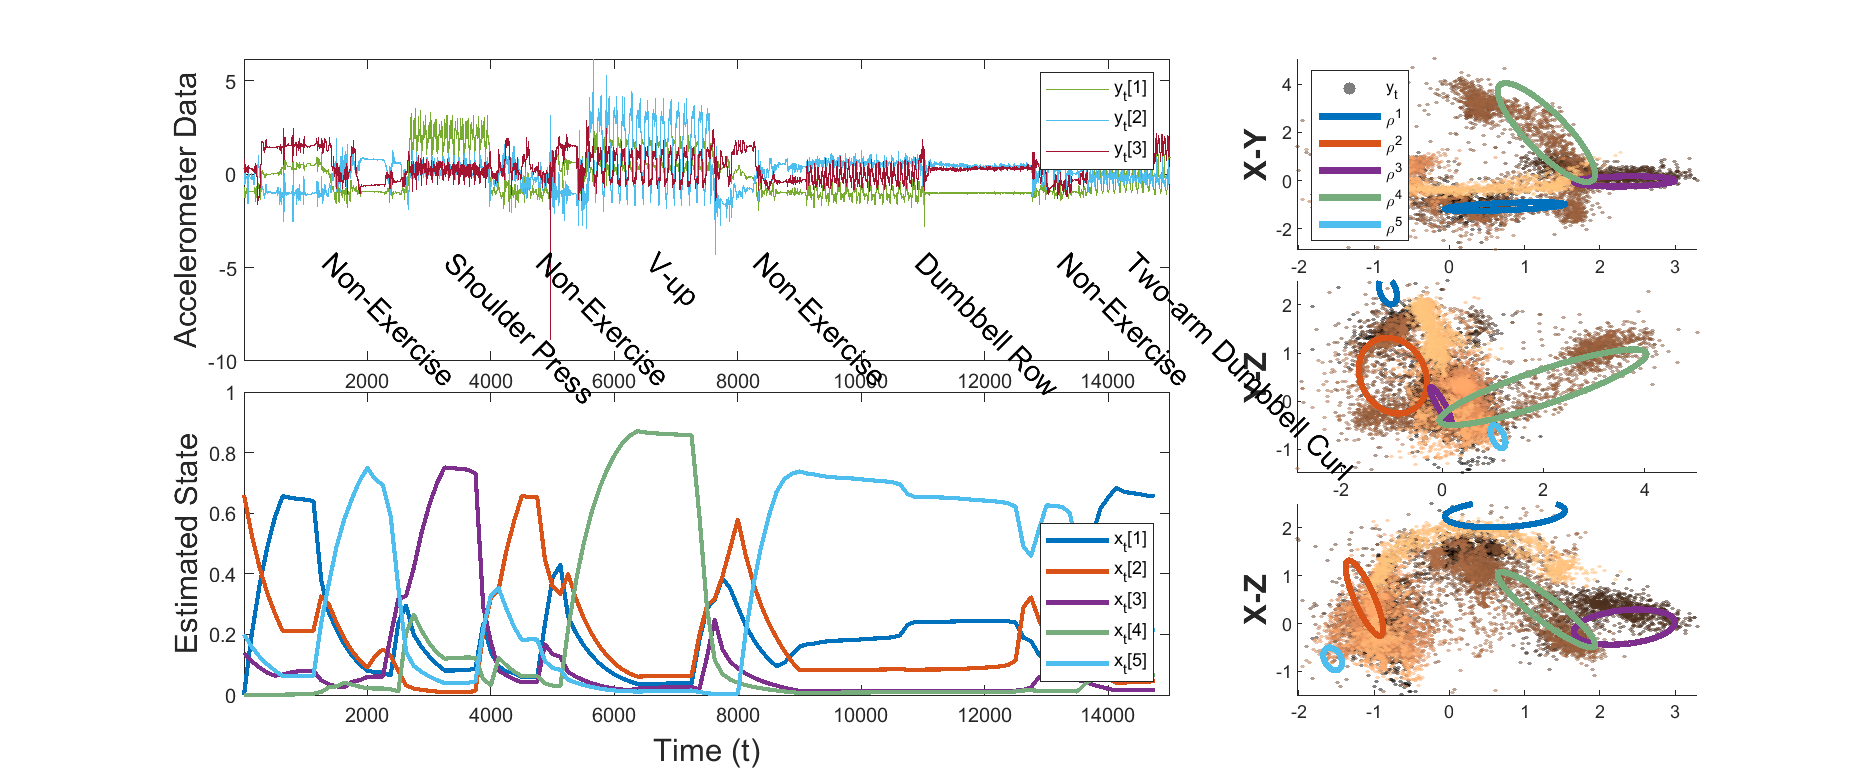

Supplement: Supplementary file 1 [file ebb71045453f38676c40deb9864f811d-Supplemental.zip › Supplement/MSR_Plots/subj049_1.png]

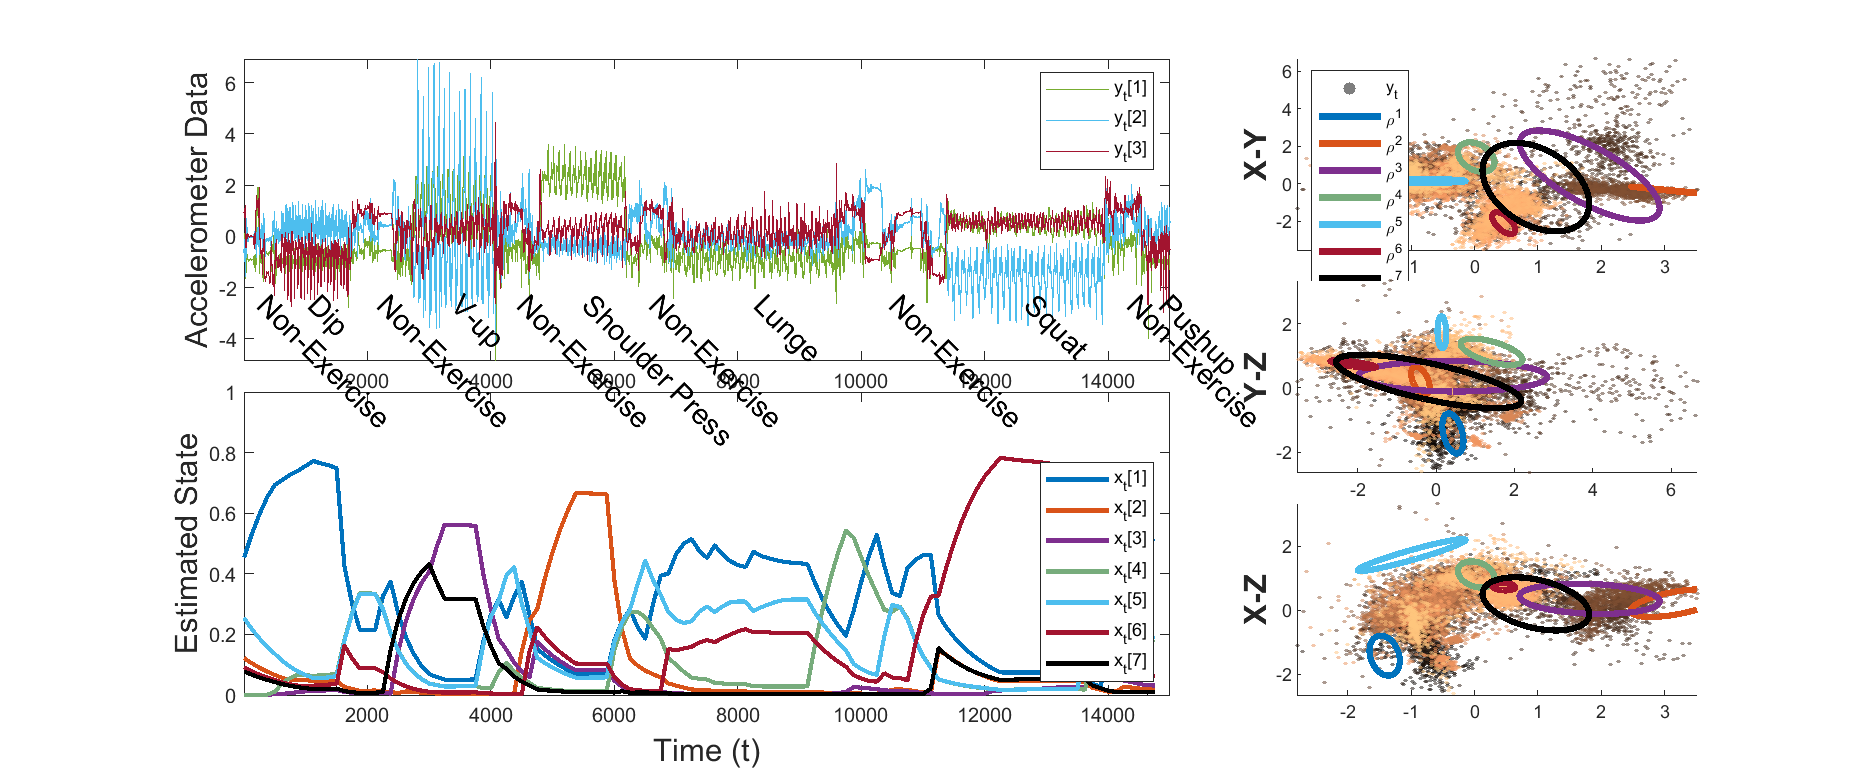

Supplement: Supplementary file 1 [file ebb71045453f38676c40deb9864f811d-Supplemental.zip › Supplement/MSR_Plots/subj050_1.png]

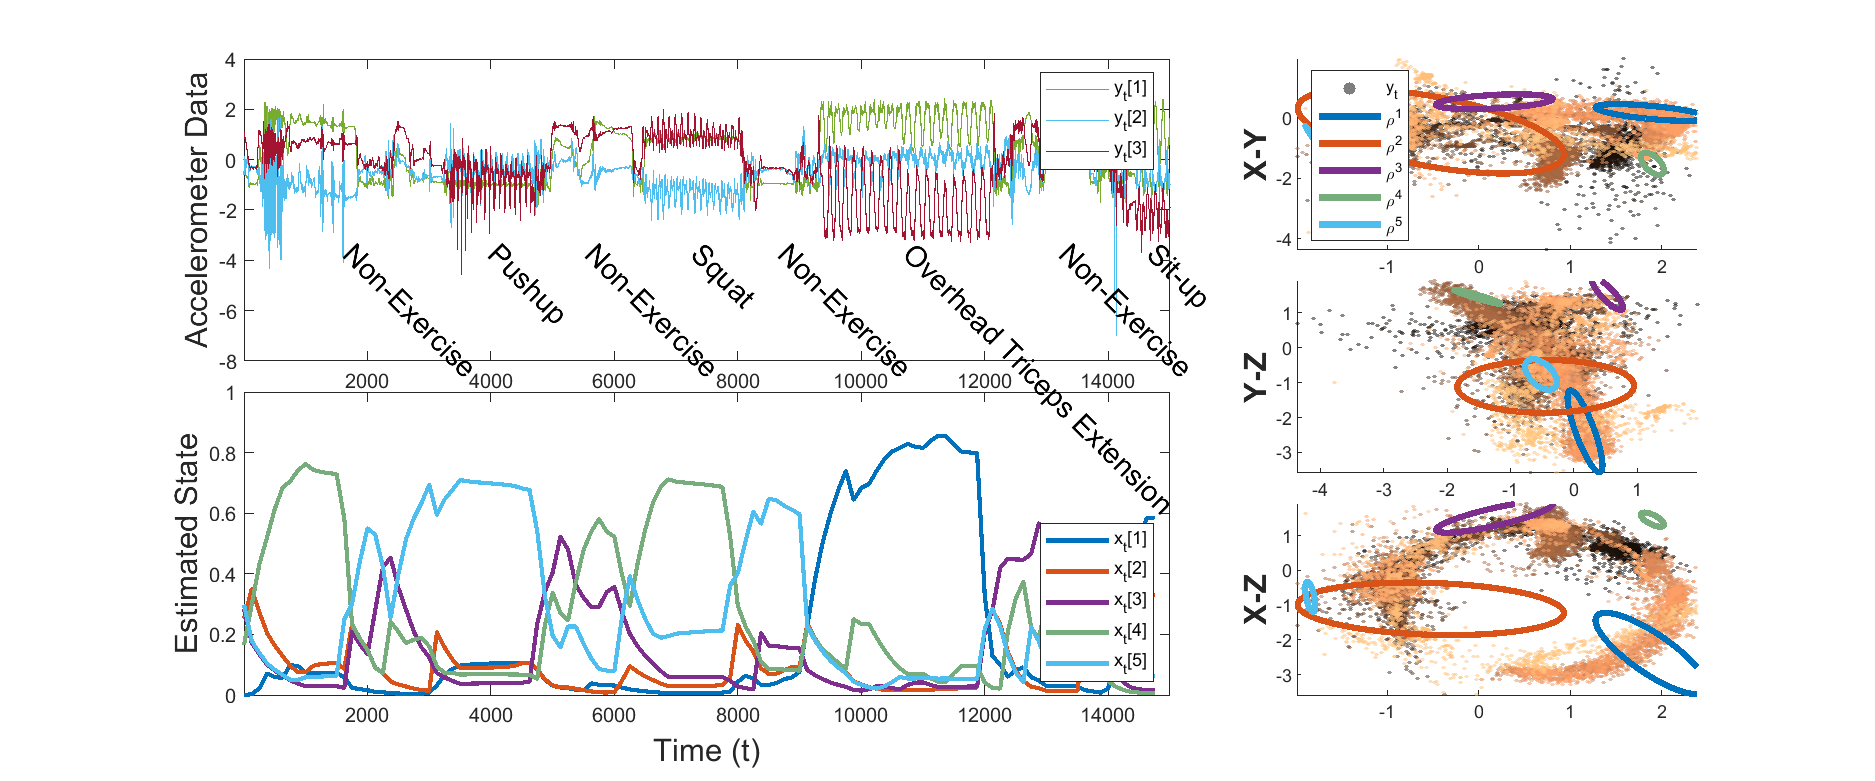

Supplement: Supplementary file 1 [file ebb71045453f38676c40deb9864f811d-Supplemental.zip › Supplement/MSR_Plots/subj051_1.png]

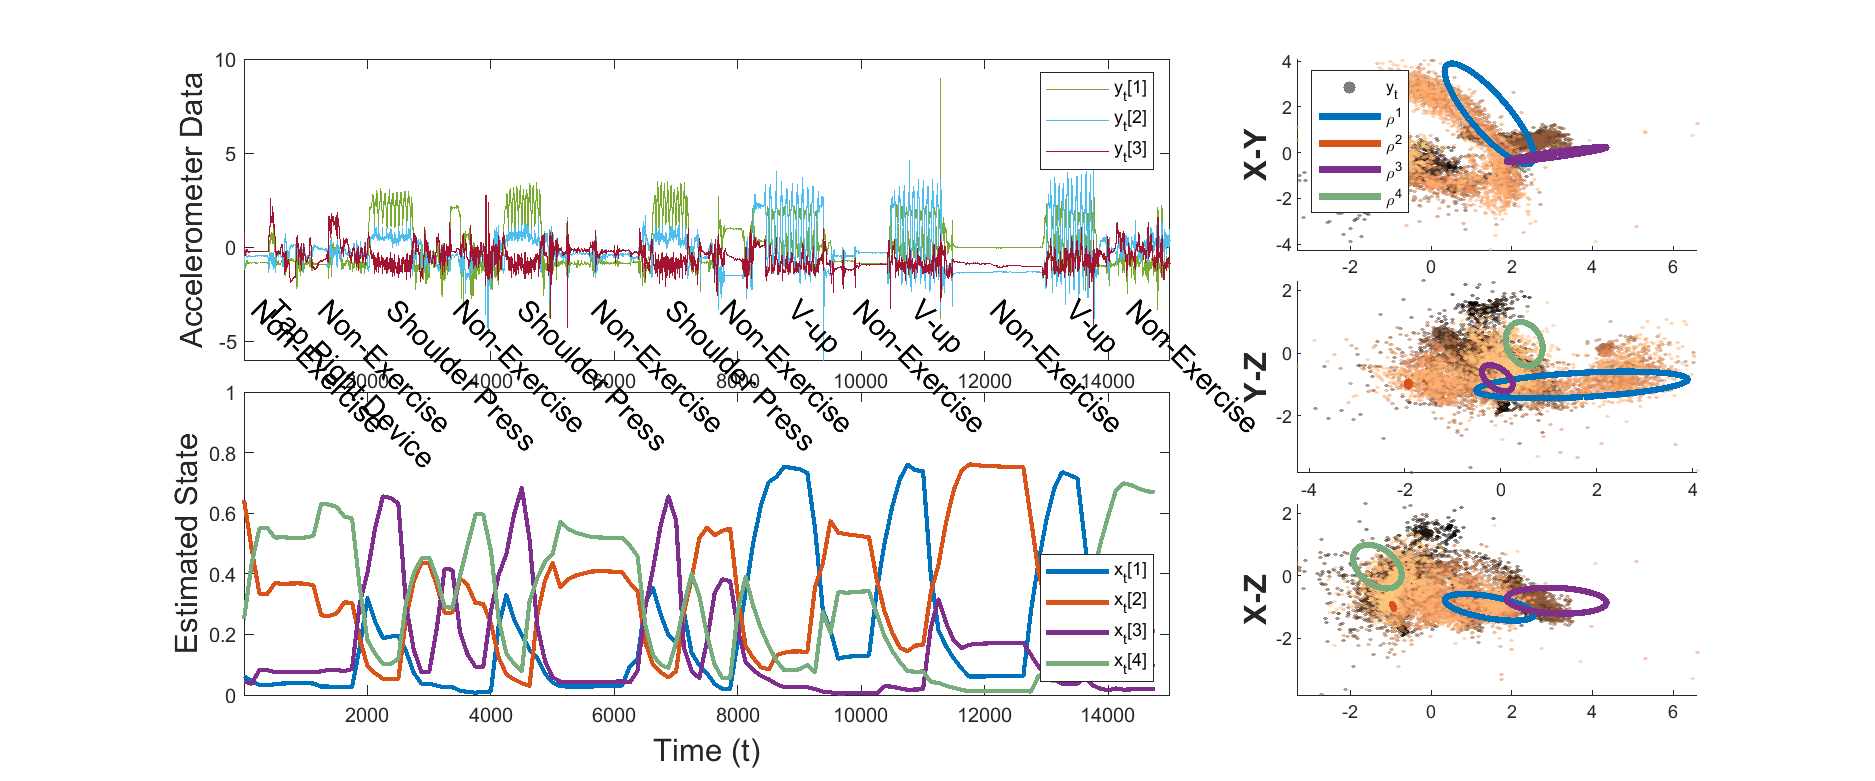

Supplement: Supplementary file 1 [file ebb71045453f38676c40deb9864f811d-Supplemental.zip › Supplement/MSR_Plots/subj052_1.png]

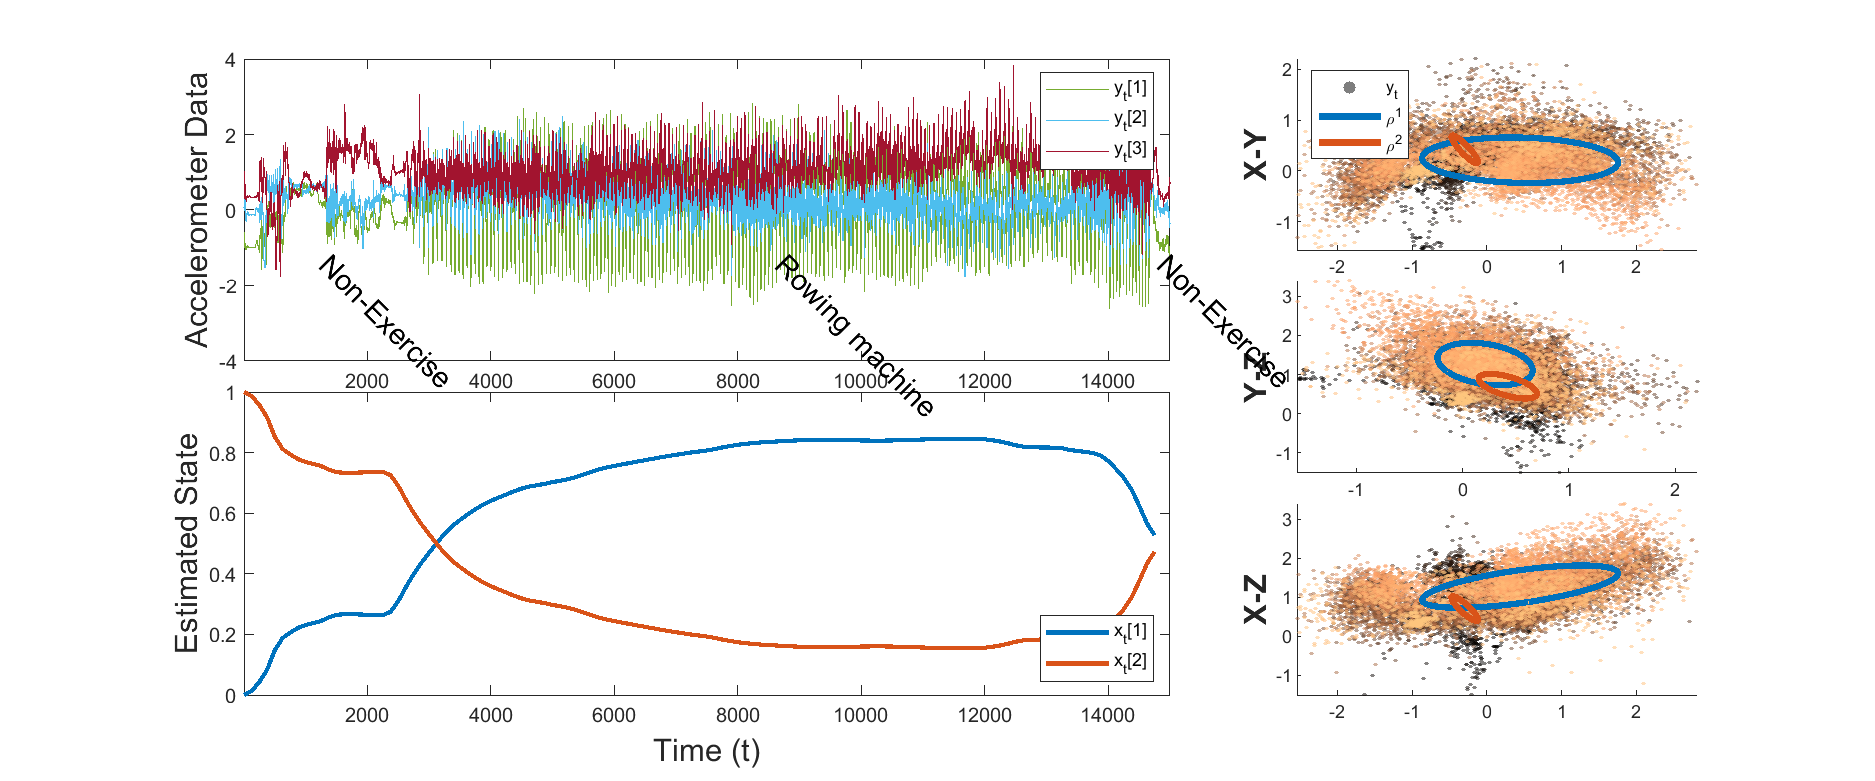

Supplement: Supplementary file 1 [file ebb71045453f38676c40deb9864f811d-Supplemental.zip › Supplement/MSR_Plots/subj052_2.png]

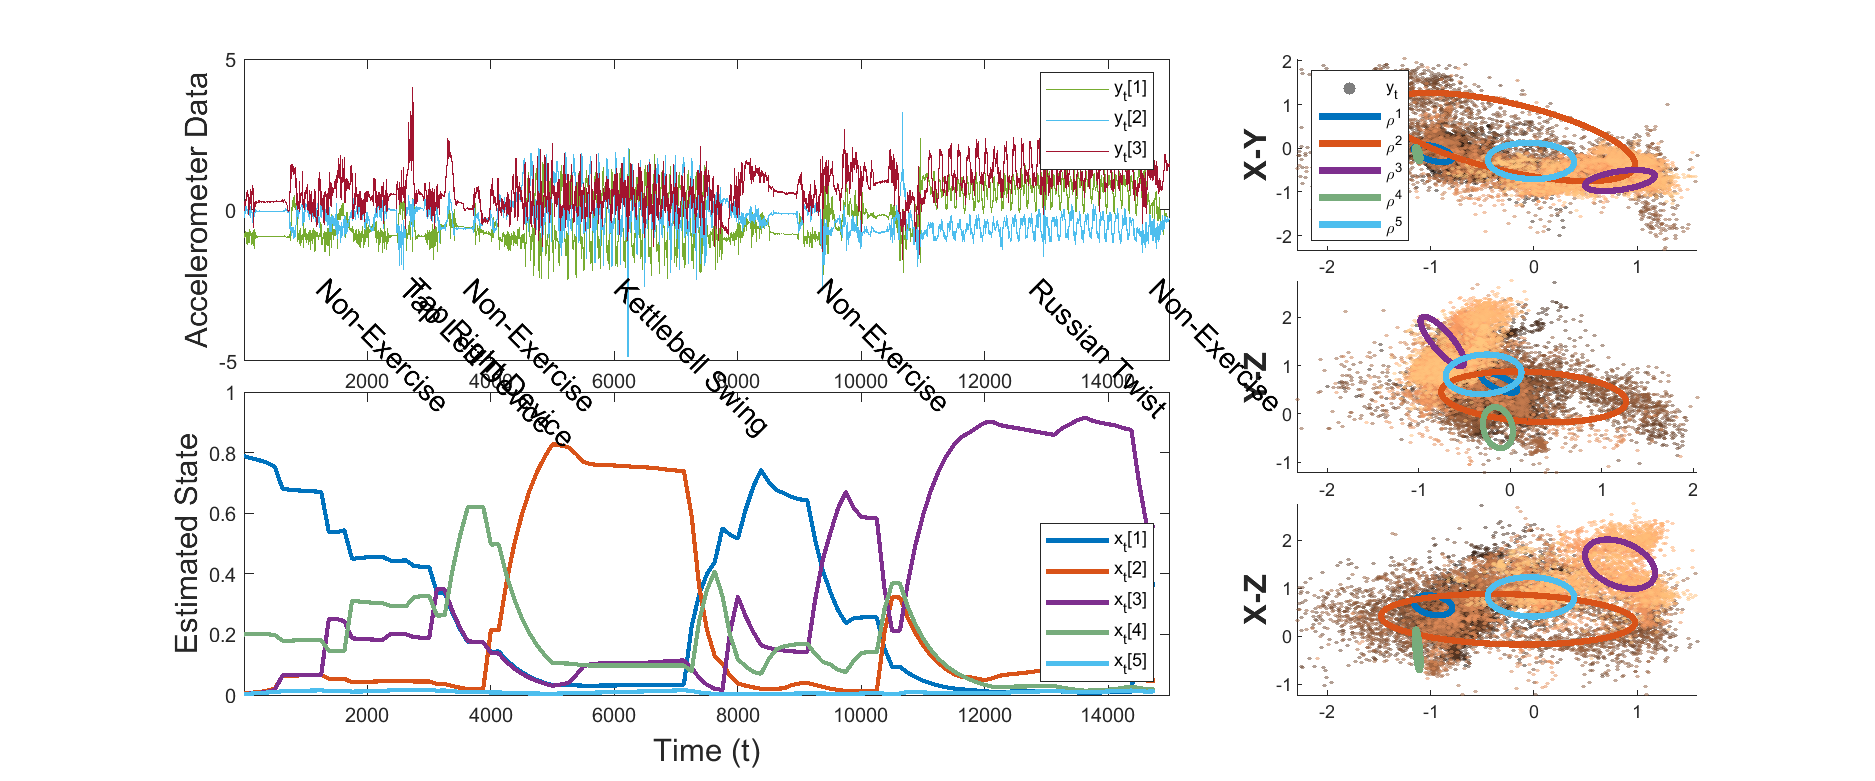

Supplement: Supplementary file 1 [file ebb71045453f38676c40deb9864f811d-Supplemental.zip › Supplement/MSR_Plots/subj053_1.png]

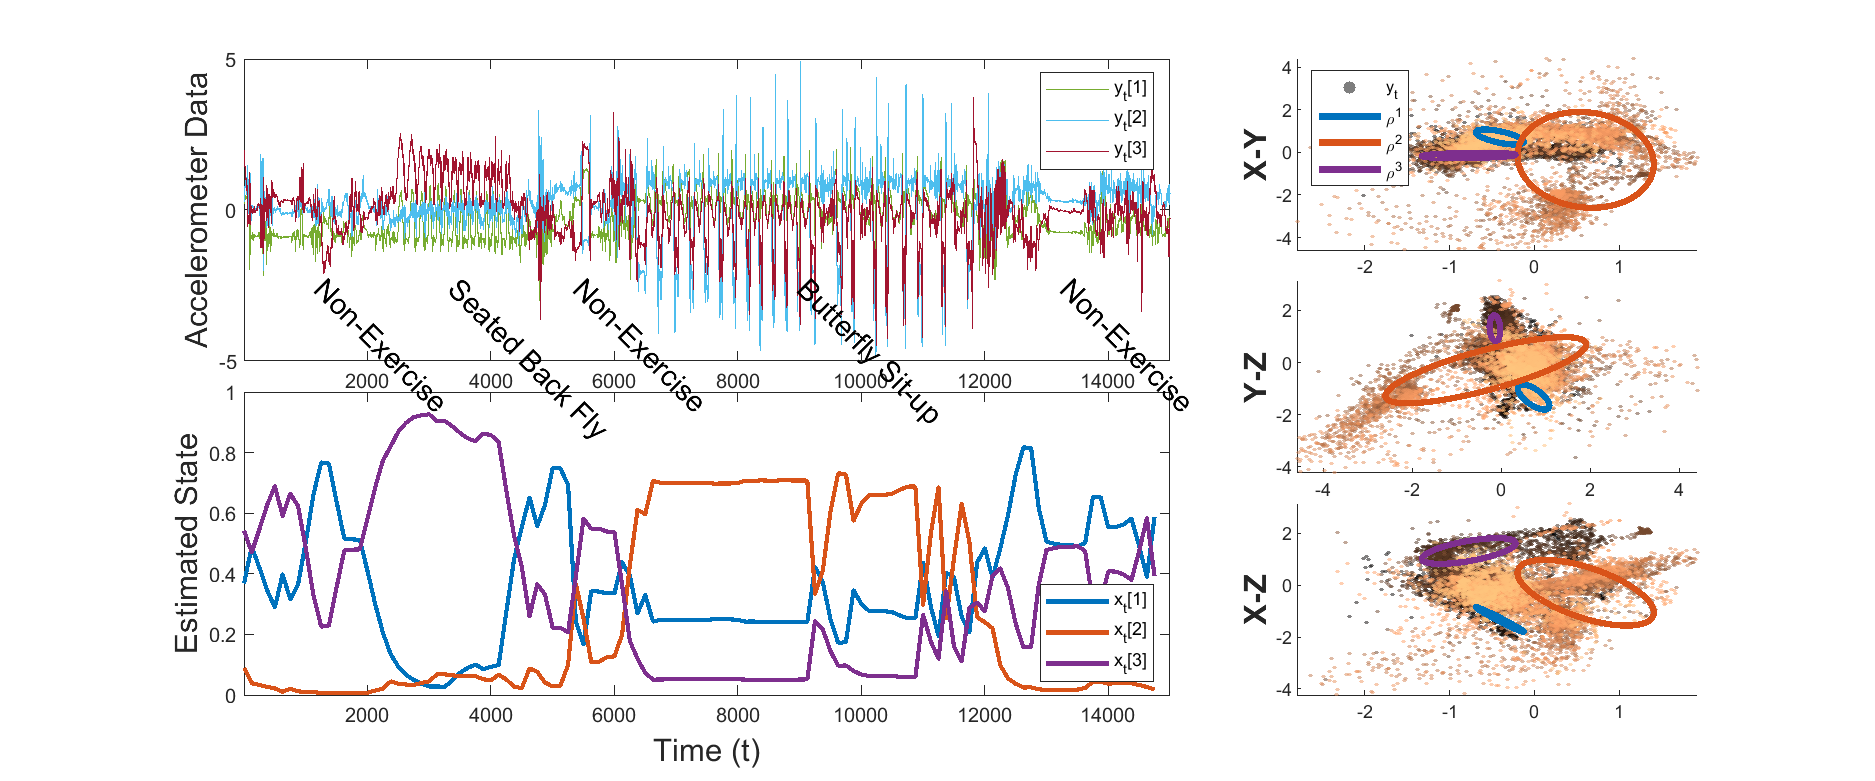

Supplement: Supplementary file 1 [file ebb71045453f38676c40deb9864f811d-Supplemental.zip › Supplement/MSR_Plots/subj054_1.png]
